# Supplementary material
Source: Royal Society of Chemistry journal article supplement (doi:10.1039/d6ob00632a)

# Supporting Information

## From one to two CO<sub>2</sub> molecules: controllable divergent synthesis of formate esters and carbonates

Qiankai You, Yubing Zhou, Yanwei Ren, Huanfeng Jiang and Chaorong Qi\*

Key Lab of Functional Molecular Engineering of Guangdong Province, School of Chemistry and  
Chemical Engineering, South China University of Technology, Guangzhou 510641, P. R. China

Emails: crqi@scut.edu.cn

### Table of Contents

|                                                                                |            |
|--------------------------------------------------------------------------------|------------|
| <b>A. General methods .....</b>                                                | <b>S2</b>  |
| <b>B. General procedure for the synthesis of formate esters 2 .....</b>        | <b>S2</b>  |
| <b>C. General procedure for the synthesis of methyl carbonate 3.....</b>       | <b>S2</b>  |
| <b>D. Optimization of the reaction conditions for the synthesis of 2a.....</b> | <b>S3</b>  |
| <b>E. Procedure for the synthesis of 2a on a 6 mmol scale .....</b>            | <b>S6</b>  |
| <b>F. Procedure for the synthesis of 3a on a 1 mmol scale.....</b>             | <b>S6</b>  |
| <b>G. Mechanistic studies .....</b>                                            | <b>S7</b>  |
| <b>H. Analytical data.....</b>                                                 | <b>S11</b> |
| <b>I. Reference .....</b>                                                      | <b>S26</b> |
| <b>J. NMR spectra of products .....</b>                                        | <b>S28</b> |

## A. General methods

$^1\text{H}$  and  $^{13}\text{C}$  NMR spectra were recorded by using a 400 MHz NMR spectrometer using  $\text{CDCl}_3$  or  $\text{DMSO-}d_6$  as solvent and TMS as an internal standard. The data of HRMS was carried out on a high-resolution mass spectrometer (LCMS-IT-TOF). GC-Mass analyses were conducted on a gas chromatograph-mass spectrometer (Trace 1300 ISQ) at an ionization voltage of 70 eV and equipped with a DB-WAX capillary column (internal diameter: 0.25 mm, length: 30 m). Melting points were determined with a digital melting point measuring instrument and are uncorrected. All the reaction temperatures reported are oil bath temperatures. All substrates and reagents were purchased from commercial sources and used directly without further treatment.

## B. General procedure for the synthesis of formate esters **2**

An oven-dried Schlenk tube (25 mL) was charged with a mixture of **1** (0.2 mmol, 1 equiv),  $\text{K}_2\text{CO}_3$  (0.1 mmol, 0.5 equiv), anhydrous NMP (1.0 mL), and a magnetic stir bar. The tube was capped with a rubber septum, evacuated, and refilled with  $\text{CO}_2$  (1 atm) three times. Then,  $\text{PhSiH}_3$  (0.12 mmol, 0.6 equiv) in anhydrous NMP (1.0 mL) was added dropwise, and the mixture was stirred at 28 °C for 3 h. After the reaction was complete, the mixture was quenched with saturated brine (5 mL) and extracted with ethyl acetate ( $3 \times 10$  mL). The combined organic layers were dried over anhydrous  $\text{Na}_2\text{SO}_4$ , filtered, and concentrated under reduced pressure. The crude residue was purified by column chromatography on silica gel using petroleum ether/ethyl acetate as eluent to afford the desired product **2**.

## C. General procedure for the synthesis of methyl carbonate **3**

An oven-dried Schlenk tube (25 mL) was charged with  $\text{Cs}_2\text{CO}_3$  (0.7 mmol, 3.5 equiv), TBAI (0.02 mmol, 0.1 equiv), and a magnetic stir bar. The tube was capped with a rubber septum, evacuated, and refilled with  $\text{CO}_2$  (1 atm) three times. Then,  $\text{PhSiH}_3$  (0.9 mmol, 4.5 equiv) in anhydrous DMF (0.5 mL) was added dropwise, and the mixture was stirred at 90 °C for 3 h. Subsequently, **1** (0.2 mmol, 1 equiv) in anhydrous PhMe (1.5 mL) was added dropwise, and the mixture was stirred at 90 °C for 2 h. After the reaction was complete, the mixture was quenched with saturated brine (5 mL) and extracted with ethyl acetate ( $3 \times 10$  mL). The combined organic layers were dried over

anhydrous Na<sub>2</sub>SO<sub>4</sub>, filtered, and concentrated under reduced pressure. The crude residue was purified by column chromatography on silica gel using petroleum ether/ethyl acetate as eluent to afford the desired product **3**.

## D. Optimization of the reaction conditions for the synthesis of **2a**

**Table S1.** The effect of silane on the reaction<sup>[a]</sup>

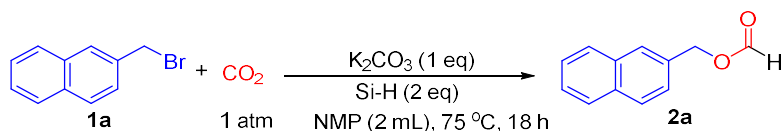

| Entry | Si-H                                  | Conversion of <b>1a</b> [%] <sup>[b]</sup> | Yield of <b>2a</b> [%] <sup>[b]</sup> |
|-------|---------------------------------------|--------------------------------------------|---------------------------------------|
| 1     | None                                  | 67                                         | 0                                     |
| 2     | PhSiH <sub>3</sub>                    | >99                                        | 97                                    |
| 3     | Ph <sub>2</sub> SiH <sub>2</sub>      | >99                                        | 90                                    |
| 4     | Ph <sub>3</sub> SiH                   | 69                                         | 0                                     |
| 5     | (CH <sub>3</sub> O) <sub>3</sub> SiH  | 70                                         | 0                                     |
| 6     | Ph(CH <sub>3</sub> ) <sub>2</sub> SiH | 71                                         | 0                                     |

<sup>[a]</sup>Reaction conditions: **1a** (0.2 mmol), K<sub>2</sub>CO<sub>3</sub> (1.0 eq), silane (2.0 eq), CO<sub>2</sub> (1 atm), NMP (2 mL), 75 °C, 18 h. <sup>[b]</sup>Determined by <sup>1</sup>H NMR with CH<sub>2</sub>Br<sub>2</sub> as internal standard.

**Table S2.** The effect of bases on the reaction<sup>[a]</sup>

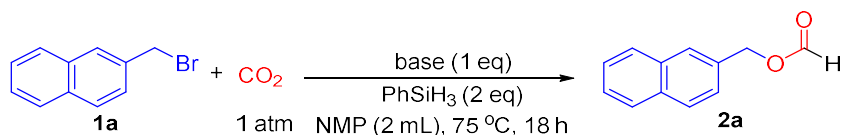

| Entry | Base                            | Conversion of <b>1a</b> [%] <sup>[b]</sup> | Yield of <b>2a</b> [%] <sup>[b]</sup> |
|-------|---------------------------------|--------------------------------------------|---------------------------------------|
| 1     | none                            | <5                                         | 0                                     |
| 2     | NEt <sub>3</sub>                | 54                                         | 26                                    |
| 3     | DBU                             | 85                                         | 63                                    |
| 4     | <sup>t</sup> BuOK               | 43                                         | 7                                     |
| 5     | NaHCO <sub>3</sub>              | >99                                        | 90                                    |
| 6     | Cs <sub>2</sub> CO <sub>3</sub> | >99                                        | 93                                    |
| 7     | KOH                             | >99                                        | 95                                    |
| 8     | K <sub>2</sub> CO <sub>3</sub>  | >99                                        | 97                                    |

<sup>[a]</sup>Reaction conditions: **1a** (0.2 mmol), base (1.0 equiv.), PhSiH<sub>3</sub> (2.0 equiv.), CO<sub>2</sub> (1 atm), NMP (2 mL), 75 °C, 18 h. <sup>[b]</sup>Determined by <sup>1</sup>H NMR with CH<sub>2</sub>Br<sub>2</sub> as internal standard.

**Table S3.** The effect of solvents on the reaction<sup>[a]</sup>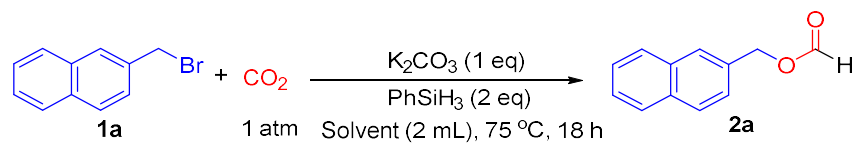

| Entry | Solvent                | Conversion of <b>1a</b> [%] <sup>[b]</sup> | Yield of <b>2a</b> [%] <sup>[b]</sup> |
|-------|------------------------|--------------------------------------------|---------------------------------------|
| 1     | NMP                    | >99                                        | 97                                    |
| 2     | THF                    | >99                                        | 0                                     |
| 3     | $\text{CH}_3\text{CN}$ | >99                                        | 0                                     |
| 4     | DMA                    | >99                                        | 95                                    |
| 5     | DMF                    | >99                                        | 82                                    |
| 6     | DMSO                   | >99                                        | 83                                    |

<sup>[a]</sup>Reaction conditions: **1a** (0.2 mmol),  $\text{K}_2\text{CO}_3$  (1.0 eq),  $\text{PhSiH}_3$  (2.0 eq),  $\text{CO}_2$  (1 atm), solvent (2 mL), 75 °C, 18 h. <sup>[b]</sup>Determined by  $^1\text{H}$  NMR with  $\text{CH}_2\text{Br}_2$  as internal standard.

**Table S4.** The effect of the loading of  $\text{K}_2\text{CO}_3$  on the reaction<sup>[a]</sup>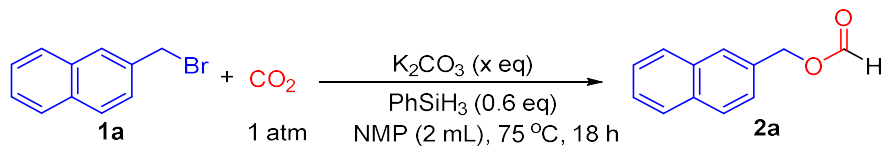

| Entry | $\text{K}_2\text{CO}_3$ | Conversion of <b>1a</b> [%] <sup>[b]</sup> | Yield of <b>2a</b> [%] <sup>[b]</sup> |
|-------|-------------------------|--------------------------------------------|---------------------------------------|
| 1     | 1 eq.                   | >99                                        | 90                                    |
| 2     | 0.5 eq.                 | >99                                        | 92                                    |
| 3     | 0.4 eq.                 | 87                                         | 84                                    |
| 4     | 0.2 eq.                 | 52                                         | Trace                                 |

<sup>[a]</sup>Reaction conditions: the mixture of **1a** (0.2 mmol),  $\text{K}_2\text{CO}_3$  (x equiv.),  $\text{PhSiH}_3$  (0.6 equiv.),  $\text{CO}_2$  (1 atm) in NMP (2 mL), 75 °C, 18 h. <sup>[b]</sup>Determined by  $^1\text{H}$  NMR with  $\text{CH}_2\text{Br}_2$  as internal standard.

**Table S5.** The effect of temperatures on the reaction<sup>[a]</sup>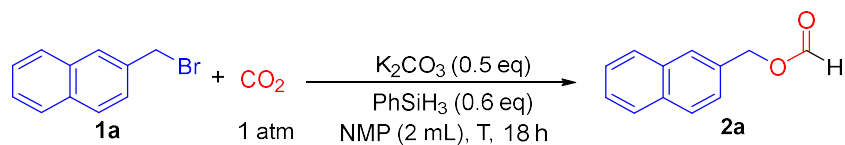

| Entry | Temp./°C | Conversion of <b>1a</b> [%] <sup>[b]</sup> | Yield of <b>2a</b> [%] <sup>[b]</sup> |
|-------|----------|--------------------------------------------|---------------------------------------|
| 1     | 90       | >99                                        | 86                                    |
| 2     | 75       | >99                                        | 88                                    |
| 3     | 60       | >99                                        | 88                                    |
| 4     | 40       | >99                                        | 89                                    |
| 5     | 28       | >99                                        | 95                                    |

<sup>[a]</sup>Reaction conditions: **1a** (0.2 mmol),  $\text{K}_2\text{CO}_3$  (0.5 eq),  $\text{PhSiH}_3$  (0.6 eq),  $\text{CO}_2$  (1 atm), NMP (2 mL), 18 h. <sup>[b]</sup>Determined by  $^1\text{H-NMR}$  with  $\text{CH}_2\text{Br}_2$  as internal standard.

**Table S6.** The effect of times on the reaction<sup>[a]</sup>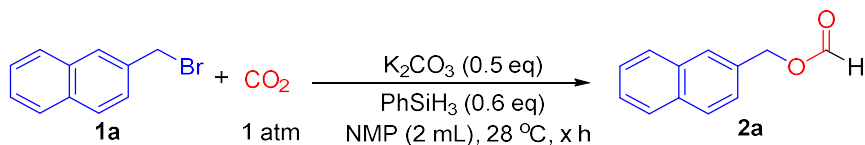

| Entry | Time/h | Conversion of <b>1a</b> [%] <sup>[b]</sup> | Yield of <b>2a</b> [%] <sup>[b]</sup> |
|-------|--------|--------------------------------------------|---------------------------------------|
| 1     | 18     | >99                                        | 95                                    |
| 2     | 12     | >99                                        | 96                                    |
| 3     | 3      | >99                                        | 97 (93) <sup>[c]</sup>                |
| 4     | 2      | >99                                        | 88                                    |
| 5     | 1      | >99                                        | 72                                    |

<sup>[a]</sup>Reaction conditions: **1a** (0.2 mmol),  $\text{K}_2\text{CO}_3$  (0.5 eq),  $\text{PhSiH}_3$  (0.6 eq),  $\text{CO}_2$  (1 atm), NMP (2 mL), 28 °C. <sup>[b]</sup>Determined by  $^1\text{H NMR}$  with  $\text{CH}_2\text{Br}_2$  as internal standard. <sup>[c]</sup>Isolated yields.

## E. Procedure for the synthesis of **2a** on a 6 mmol scale

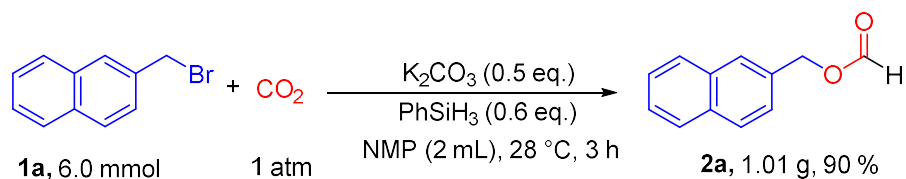

An oven-dried Schlenk tube (125 mL) was charged with a mixture of **1a** (6.0 mmol, 1 equiv),  $\text{K}_2\text{CO}_3$  (3.0 mmol, 0.5 equiv), anhydrous NMP (10.0 mL), and a magnetic stir bar. The tube was capped with a rubber septum, evacuated, and refilled with  $\text{CO}_2$  (1 atm) three times. Then,  $\text{PhSiH}_3$  (3.6 mmol, 0.6 equiv) in anhydrous NMP (10.0 mL) was added dropwise, and the mixture was stirred at 28 °C for 3 h. After the reaction was complete, the mixture was quenched with saturated brine (10 mL) and extracted with ethyl acetate ( $3 \times 10$  mL). The combined organic layers were dried over anhydrous  $\text{Na}_2\text{SO}_4$ , filtered, and concentrated under reduced pressure. The crude residue was purified by column chromatography on silica gel using petroleum ether/ethyl acetate as eluent to afford the desired product **2a** (1.01 g, 90% yield).

## F. Procedure for the synthesis of **3a** on a 1 mmol scale

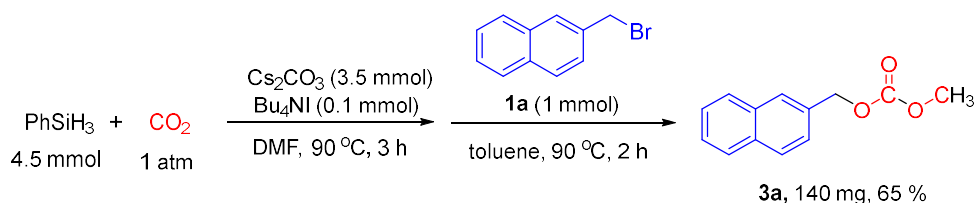

An oven-dried Schlenk tube (125 mL) was charged with  $\text{Cs}_2\text{CO}_3$  (3.5 mmol, 3.5 equiv), TBAI (0.1 mmol, 0.1 equiv), and a magnetic stir bar. The tube was capped with a rubber septum, evacuated, and refilled with  $\text{CO}_2$  (1 atm) three times. Then,  $\text{PhSiH}_3$  (4.5 mmol, 4.5 equiv) in anhydrous DMF (2.5 mL) was added dropwise, and the mixture was stirred at 90 °C for 3 h. Subsequently, **1a** (1.0 mmol, 1 equiv) in anhydrous PhMe (7.5 mL) was added dropwise, and the mixture was stirred at 90 °C for 2 h. After the reaction was complete, the mixture was quenched with saturated brine (10 mL) and extracted with ethyl acetate ( $3 \times 10$  mL). The combined organic layers were dried over anhydrous  $\text{Na}_2\text{SO}_4$ , filtered, and concentrated under reduced pressure. The crude residue was purified by column chromatography on silica gel using petroleum ether/ethyl acetate as eluent to afford the desired product **3a** (140 mg, 65% yield).

## G. Mechanistic studies

### (1) For the synthesis of formate esters 2

#### i) <sup>13</sup>C-labeling experiment

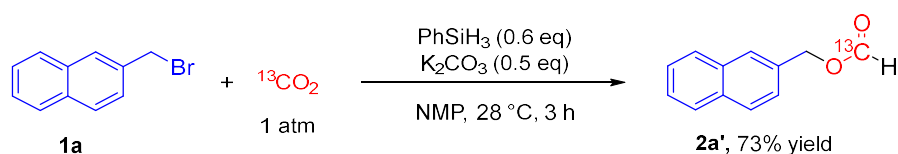

An oven dried Schlenk tube (25 mL) was charged with the mixture of **1a** (0.2 mmol, 1 equiv), K<sub>2</sub>CO<sub>3</sub> (0.1 mmol, 0.5 equiv), anhydrous NMP (1.0 mL), and a magnetic stirring bar. The tube was capped with a rubber septum, the tube was then evacuated, refilled with <sup>13</sup>CO<sub>2</sub> (1 atm) three times. Then PhSiH<sub>3</sub> (0.6 equiv) in the solvent of anhydrous NMP (1.0 mL) was added dropwise and stirred at 28 °C for 3 h. After the reaction was completed, the reaction mixture was quenched with saturated brine water (5 mL) and extracted with ethyl acetate (3×10 mL) three times. The organic layer was dried over anhydrous Na<sub>2</sub>SO<sub>4</sub>, and then filtered and concentrated under reduced pressure. The crude residue was separated by column chromatography on a silica gel column using petroleum ether/ethyl acetate (10:1) as eluent to give the desired product **2a'** (27.3 mg, 73% yield). <sup>1</sup>H NMR (400 MHz, CDCl<sub>3</sub>) δ 8.20 (d, *J* = 226.4 Hz, 1H), 7.89 – 7.80 (m, 4H), 7.55 – 7.47 (m, 3H), 5.38 (d, *J* = 3.2 Hz, 2H); <sup>13</sup>C NMR (100 MHz, CDCl<sub>3</sub>) δ 160.8, 133.1, 133.1, 132.5 (d, *J* = 2.1 Hz), 128.5, 128.0, 127.7, 127.5, 126.4, 126.4, 125.7, 65.8 (d, *J* = 2.8 Hz); HRMS (ESI): *m/z* [M-H]<sup>+</sup> calcd for C<sub>11</sub><sup>13</sup>CH<sub>9</sub>O<sub>2</sub><sup>+</sup>: 186.0642; found: 186.0635.

#### ii) Deuterium-labeling experiment

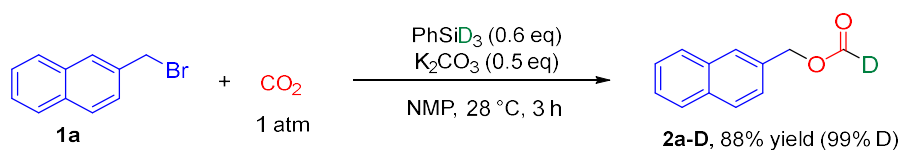

An oven dried Schlenk tube (25 mL) was charged with the mixture of **1a** (0.2 mmol, 1 equiv), K<sub>2</sub>CO<sub>3</sub> (0.1 mmol, 0.5 equiv), anhydrous NMP (1.0 mL), and a magnetic stirring bar. The tube was capped with a rubber septum, the tube was then evacuated, refilled with CO<sub>2</sub> (1 atm) three times. Then PhSiD<sub>3</sub> (0.12 mmol, 0.6 equiv) in the solvent of anhydrous NMP (1.0 mL) was added dropwise and stirred at 28 °C for 3 h. After the reaction was completed, the reaction mixture was quenched with saturated brine water (5 mL) and extracted with ethyl acetate (3×10 mL) three times. The organic layer was dried over anhydrous Na<sub>2</sub>SO<sub>4</sub>, and then filtered and concentrated

under reduced pressure. The crude residue was separated by column chromatography on a silica gel column using petroleum ether/ethyl acetate (10:1) as eluent to give the desired product **2a-D** (32.9 mg, 88% yield).  $^1\text{H}$  NMR (400 MHz,  $\text{DMSO-}d_6$ )  $\delta$  7.96 – 7.89 (m, 4H), 7.56 – 7.48 (m, 3H), 5.34 (s, 2H);  $^{13}\text{C}$  NMR (100 MHz,  $\text{DMSO-}d_6$ )  $\delta$  162.3 (t,  $J = 34.6$  Hz), 133.8, 133.2, 133.1, 128.6, 128.3, 128.1, 127.4, 126.9, 126.8, 126.4, 65.4.

iii) Control experiment

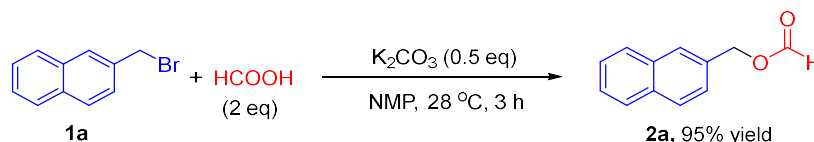

An oven-dried Schlenk tube (25 mL) was charged with a mixture of **1a** (0.2 mmol, 1 equiv),  $\text{K}_2\text{CO}_3$  (0.1 mmol, 0.5 equiv),  $\text{HCOOH}$  (0.4 mmol, 2.0 equiv), anhydrous NMP (2.0 mL), and a magnetic stir bar. The tube was capped with a rubber septum, and the mixture was stirred at 28 °C for 3 h. After the reaction was complete, the mixture was quenched with saturated brine (5 mL) and extracted with ethyl acetate ( $3 \times 10$  mL). The combined organic layers were dried over anhydrous  $\text{Na}_2\text{SO}_4$ , filtered, and concentrated under reduced pressure. The crude residue was purified by column chromatography on silica gel using petroleum ether/ethyl acetate (10:1) as eluent to afford the desired product **2a** in 95% yield.

## (2) For the synthesis of carbonates 3

i)  $^{13}\text{C}$  labeling experiment

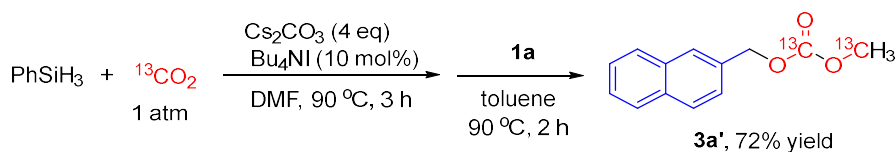

An oven-dried Schlenk tube (25 mL) was charged with  $\text{Cs}_2\text{CO}_3$  (0.7 mmol, 3.5 equiv), TBAI (0.02 mmol, 0.1 equiv), and a magnetic stir bar. The tube was capped with a rubber septum, evacuated, and refilled with  $^{13}\text{CO}_2$  (1 atm) three times. Then,  $\text{PhSiH}_3$  (0.9 mmol, 4.5 equiv) in anhydrous DMF (0.5 mL) was added dropwise, and the mixture was stirred at 90 °C for 3 h. Subsequently, **1a** (0.2 mmol, 1 equiv) in anhydrous PhMe (1.5 mL) was added dropwise, and the mixture was stirred at 90 °C for 2 h. After the reaction was complete, the mixture was quenched with saturated brine (5 mL) and extracted with ethyl acetate ( $3 \times 10$  mL). The combined organic layers were dried over anhydrous  $\text{Na}_2\text{SO}_4$ , filtered, and concentrated under reduced pressure. The crude

residue was purified by column chromatography on silica gel using petroleum ether/ethyl acetate (10:1) as eluent to afford the desired product **3a'** (31.4 mg, 72% yield). <sup>1</sup>H NMR (400 MHz, CDCl<sub>3</sub>) δ 7.90 – 7.81 (m, 4H), 7.55 – 7.45 (m, 3H), 5.38 – 5.25 (m, 2H), 4.02 – 3.59 (m, 3H); <sup>13</sup>C NMR (100 MHz, CDCl<sub>3</sub>) δ 155.7 (d, *J* = 1.6 Hz), 133.2, 133.1, 132.6, 128.4, 128.0, 127.7, 127.5, 126.3(9), 126.3(7), 125.7, 69.7, 54.8 (d, *J* = 1.5 Hz); HRMS (ESI): *m/z* [M+H]<sup>+</sup> calcd for C<sub>11</sub><sup>13</sup>C<sub>2</sub>H<sub>12</sub>O<sub>3</sub><sup>+</sup>: 218.0854; found: 218.0845.

ii) Deuterium-labeling experiment

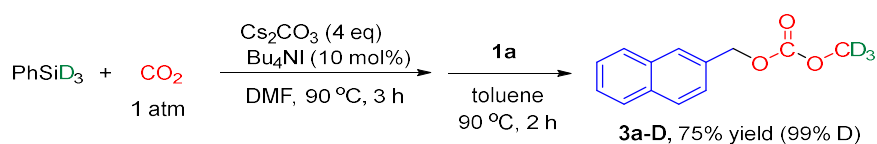

An oven-dried Schlenk tube (25 mL) was charged with Cs<sub>2</sub>CO<sub>3</sub> (0.7 mmol, 3.5 equiv), TBAI (0.02 mmol, 0.1 equiv), and a magnetic stir bar. The tube was capped with a rubber septum, evacuated, and refilled with CO<sub>2</sub> (1 atm) three times. Then, PhSiD<sub>3</sub> (0.9 mmol, 4.5 equiv) in anhydrous DMF (0.5 mL) was added dropwise, and the mixture was stirred at 90 °C for 3 h. Subsequently, **1a** (0.2 mmol, 1 equiv) in anhydrous PhMe (1.5 mL) was added dropwise, and the mixture was stirred at 90 °C for 2 h. After the reaction was complete, the mixture was quenched with saturated brine (5 mL) and extracted with ethyl acetate (3 × 10 mL). The combined organic layers were dried over anhydrous Na<sub>2</sub>SO<sub>4</sub>, filtered, and concentrated under reduced pressure. The crude residue was purified by column chromatography on silica gel using petroleum ether/ethyl acetate (10:1) as eluent to afford the desired product **3a-D** (32.8 mg, 75% yield). <sup>1</sup>H NMR (400 MHz, CDCl<sub>3</sub>) δ 7.86 (d, *J* = 8.0 Hz, 4H), 7.50 (m, 3H), 5.34 (s, 2H); <sup>13</sup>C NMR (100 MHz, CDCl<sub>3</sub>) δ 155.7, 133.2, 133.1, 132.6, 128.4, 128.0, 127.7, 127.4, 126.3(4), 126.2(9), 125.7, 69.7.

iii) Control experiment

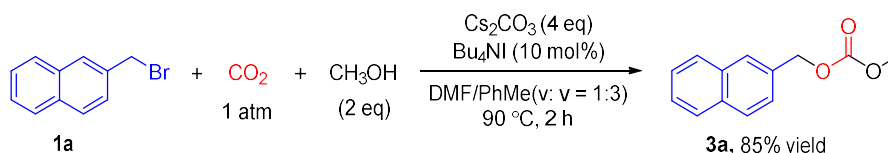

An oven-dried Schlenk tube (25 mL) was charged with a mixture of **1a** (0.2 mmol, 1 equiv), Cs<sub>2</sub>CO<sub>3</sub> (0.7 mmol, 3.5 equiv), TBAI (0.02 mmol, 0.1 equiv), and a magnetic stir bar. The tube was capped with a rubber septum, evacuated, and refilled with CO<sub>2</sub> (1 atm) three times. Then, CH<sub>3</sub>OH (0.4 mmol, 2.0 equiv) in a mixed solvent of anhydrous DMF (0.5 mL) and PhMe (1.5 mL) was added dropwise, and the mixture was stirred at 90 °C for 2 h. After the reaction was complete,

the mixture was quenched with saturated brine (5 mL) and extracted with ethyl acetate (3 × 10 mL). The combined organic layers were dried over anhydrous Na<sub>2</sub>SO<sub>4</sub>, filtered, and concentrated under reduced pressure. The crude residue was purified by column chromatography on silica gel using petroleum ether/ethyl acetate (10:1) as eluent to afford the desired product **3a** in 85% yield.

## H. Analytical data

### Naphthalen-2-ylmethyl formate (2a)<sup>[1]</sup>

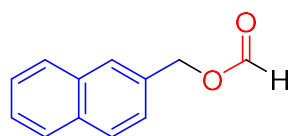

Eluent: PE : EA = 10:1; White solid, 34.6 mg, 93% yield. m.p. 83-84 °C; <sup>1</sup>H NMR (400 MHz, CDCl<sub>3</sub>) δ 8.20 (s, 1H), 7.92 – 7.81 (m, 4H), 7.57 – 7.45 (m, 3H), 5.38 (s, 2H); <sup>13</sup>C NMR (100 MHz, CDCl<sub>3</sub>) δ 160.8, 133.1(4), 133.1(1), 132.5, 128.5, 128.0, 127.7, 127.5, 126.4, 126.4, 125.7, 65.8.

### Benzyl formate (2b)<sup>[2]</sup>

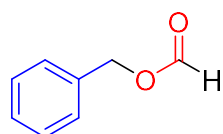

Eluent: PE : EA = 20:1; Colorless oil, 23.1 mg, 85% yield. <sup>1</sup>H NMR (400 MHz, CDCl<sub>3</sub>) δ 8.15 (s, 1H), 7.41 – 7.35 (m, 5H), 5.22 (s, 2H); <sup>13</sup>C NMR (100 MHz, CDCl<sub>3</sub>) δ 160.7, 135.1, 128.6, 128.4, 128.3, 65.6.

### 4-Methylbenzyl formate (2c)<sup>[1]</sup>

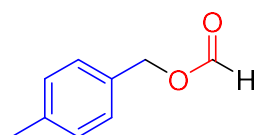

Eluent: PE : EA = 20:1; Colorless oil, 26.4 mg, 88% yield. <sup>1</sup>H NMR (400 MHz, CDCl<sub>3</sub>) δ 8.13 (s, 1H), 7.28 (d, *J* = 8.0 Hz, 2H), 7.19 (d, *J* = 7.9 Hz, 2H), 5.18 (s, 2H), 2.37 (s, 3H); <sup>13</sup>C NMR (100 MHz, CDCl<sub>3</sub>) δ 160.8, 138.4, 132.2, 129.3, 128.5, 65.6, 21.2.

### 4-Tertbutylbenzyl formate (2d)<sup>[3]</sup>

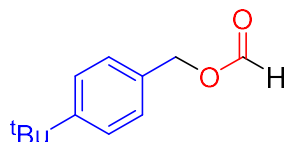

Eluent: PE : EA = 20:1; Yellow oil, 35.4 mg, 92% yield. <sup>1</sup>H NMR (400 MHz, CDCl<sub>3</sub>) δ 8.15 (s, 1H), 7.43 (d, *J* = 8.3 Hz, 2H), 7.34 (d, *J* = 8.3 Hz, 2H), 5.20 (s, 2H), 1.35 (s, 9H); <sup>13</sup>C NMR (100 MHz, CDCl<sub>3</sub>) δ 160.8, 151.6, 132.2, 128.3, 125.5, 65.5, 34.6, 31.2.

### 4-Bromobenzyl formate (2e)<sup>[2]</sup>

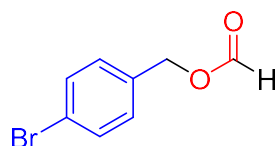

Eluent: PE : EA = 20:1; Colorless oil, 36.8 mg, 86% yield. <sup>1</sup>H NMR (400 MHz, CDCl<sub>3</sub>) δ 8.15 (s, 1H), 7.53 (d, *J* = 8.4 Hz, 2H), 7.27 (d, *J* = 8.5 Hz, 2H), 5.17 (s, 2H); <sup>13</sup>C NMR (100 MHz, CDCl<sub>3</sub>) δ 160.6, 134.2, 131.8, 130.0, 122.5, 64.8.

### 4-Fluorobenzyl formate (2f)<sup>[3]</sup>

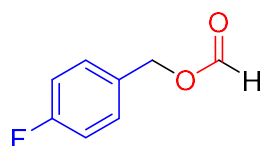

Eluent: PE : EA = 10:1; Colorless oil, 26.2 mg, 85% yield. <sup>1</sup>H NMR (400 MHz, CDCl<sub>3</sub>) δ 8.12 (s, 1H), 7.36 (dd, *J* = 8.3, 5.5 Hz, 2H), 7.06 (t, *J* = 8.6 Hz, 2H), 5.17 (s, 2H); <sup>13</sup>C NMR (100 MHz, CDCl<sub>3</sub>) δ 162.8 (d, *J*

= 247.4 Hz), 160.7, 131.0 (d,  $J = 3.4$  Hz), 130.4 (d,  $J = 8.3$  Hz), 115.6 (d,  $J = 21.6$  Hz), 65.0.

#### 4-(Trifluoromethyl)benzyl formate (2g)<sup>[4]</sup>

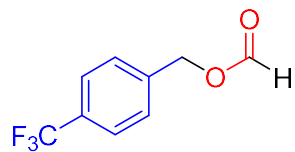

Eluent: PE : EA = 10:1; Colorless oil, 37.1 mg, 91% yield. <sup>1</sup>H NMR (400 MHz, CDCl<sub>3</sub>)  $\delta$  8.16 (s, 1H), 7.64 (d,  $J = 8.1$  Hz, 2H), 7.49 (d,  $J = 8.0$  Hz, 2H), 5.26 (s, 2H); <sup>13</sup>C NMR (100 MHz, CDCl<sub>3</sub>)  $\delta$  160.5, 139.1, 130.8, 128.2, 125.59 (q,  $J = 3.8$  Hz), 122.6, 64.6.

#### 4-Acetylbenzyl formate (2h)

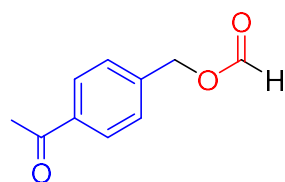

Eluent: PE : EA = 5:1; Yellow solid, 32.8 mg, 92% yield. m.p. 51 - 53 °C; <sup>1</sup>H NMR (400 MHz, CDCl<sub>3</sub>)  $\delta$  8.16 (s, 1H), 7.95 (d, 2H), 7.45 (d,  $J = 8.4$  Hz, 2H), 5.25 (s, 2H), 2.60 (s, 3H); <sup>13</sup>C NMR (100 MHz, CDCl<sub>3</sub>)  $\delta$  197.5, 160.5, 140.3, 137.0, 128.6, 128.0, 64.8, 26.6; HRMS (ESI):  $m/z$  [M+H]<sup>+</sup> calcd for C<sub>10</sub>H<sub>11</sub>O<sub>3</sub><sup>+</sup>: 179.0703; found: 179.0698.

#### 4-Nitrobenzyl formate (2i)<sup>[4]</sup>

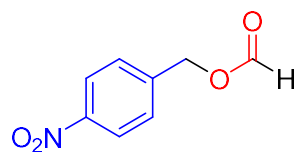

Eluent: PE : EA = 5:1; Yellow oil, 31.8 mg, 88% yield. <sup>1</sup>H NMR (400 MHz, CDCl<sub>3</sub>)  $\delta$  8.24 (d,  $J = 8.6$  Hz, 2H), 8.18 (s, 1H), 7.54 (d,  $J = 8.6$  Hz, 2H), 5.30 (s, 2H); <sup>13</sup>C NMR (100 MHz, CDCl<sub>3</sub>)  $\delta$  160.3, 147.7, 142.3, 128.4, 123.7, 64.0.

#### [1,1'-Biphenyl]-4-methyl formate (2j)<sup>[4]</sup>

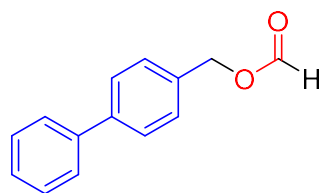

Eluent: PE : EA = 10:1; White solid, 40.3 mg, 95% yield. m.p. 54 - 55 °C; <sup>1</sup>H NMR (400 MHz, CDCl<sub>3</sub>)  $\delta$  8.18 (s, 1H), 7.63 - 7.59 (m, 4H), 7.48 - 7.44 (m, 4H), 7.39 - 7.35 (m, 1H), 5.26 (s, 2H); <sup>13</sup>C NMR (100 MHz, CDCl<sub>3</sub>)  $\delta$  160.8, 141.5, 140.5, 134.1, 128.8(4), 128.8(0), 127.5, 127.4, 127.1, 65.4.

#### [1,1'-Biphenyl]-2'-cyano-4-methyl formate (2k)

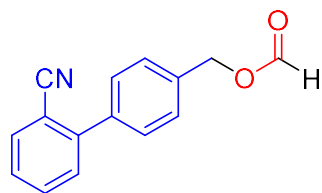

Eluent: PE : EA = 5:1; White solid, 43.6 mg, 92% yield. m.p. 115 - 117 °C; <sup>1</sup>H NMR (400 MHz, CDCl<sub>3</sub>)  $\delta$  8.17 (s, 1H), 7.76 (dd,  $J = 7.7, 1.0$  Hz, 1H), 7.67 - 7.62 (m, 1H), 7.60 - 7.56 (m, 2H), 7.50 (d,  $J = 7.9$  Hz, 3H), 7.45 (td,  $J = 7.6, 1.2$  Hz, 1H), 5.27 (s, 2H); <sup>13</sup>C

NMR (100 MHz, CDCl<sub>3</sub>)  $\delta$  160.6, 144.7, 138.2, 135.7, 133.7, 132.8, 129.9, 128.9, 128.5, 127.7, 118.5, 111.2, 65.0; HRMS (ESI):  $m/z$  [M+Na]<sup>+</sup> calcd for C<sub>15</sub>H<sub>11</sub>NO<sub>2</sub>Na<sup>+</sup>: 260.0682; found: 260.0676.

### 2-Bromobenzyl formate (2l)<sup>[5]</sup>

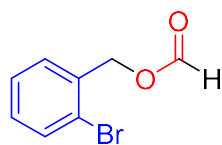

Eluent: PE : EA = 10:1; Umber oil, 37.2 mg, 87% yield. <sup>1</sup>H NMR (400 MHz, CDCl<sub>3</sub>)  $\delta$  8.20 (s, 1H), 8.14 (d,  $J$  = 8.3 Hz, 1H), 7.71 – 7.62 (m, 2H), 7.52 (t,  $J$  = 7.6 Hz, 1H), 5.62 (s, 2H); <sup>13</sup>C NMR (100 MHz, CDCl<sub>3</sub>)  $\delta$  160.1, 133.8, 131.3, 129.2, 129.0, 125.2, 62.4.

### 2-Methylbenzyl formate (2m)<sup>[3]</sup>

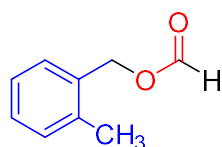

Eluent: PE : EA = 20:1; Colorless oil, 27.3 mg, 91% yield. <sup>1</sup>H NMR (400 MHz, CDCl<sub>3</sub>)  $\delta$  8.15 (s, 1H), 7.35 (d,  $J$  = 7.0 Hz, 1H), 7.28 (t,  $J$  = 7.1 Hz, 1H), 7.22 (d,  $J$  = 4.6 Hz, 2H), 5.23 (s, 2H), 2.38 (s, 3H); <sup>13</sup>C NMR (100 MHz, CDCl<sub>3</sub>)  $\delta$  160.8, 137.1, 133.1, 130.4, 129.4, 128.8, 126.1, 64.1, 18.8.

### 2-Nitrobenzyl formate (2n)<sup>[6]</sup>

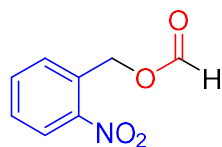

Eluent: PE : EA = 5:1; Yellow oil, 32.6 mg, 90% yield. <sup>1</sup>H NMR (400 MHz, CDCl<sub>3</sub>)  $\delta$  8.19 (s, 1H), 8.12 (d,  $J$  = 8.2 Hz, 1H), 7.69 – 7.61 (m, 2H), 7.54 – 7.48 (m, 1H), 5.61 (s, 2H); <sup>13</sup>C NMR (100 MHz, CDCl<sub>3</sub>)  $\delta$  160.1, 147.4, 133.8, 131.2, 129.1, 129.0, 125.1, 62.3.

### Methyl 2-((formyloxy)methyl)benzoate (2o)

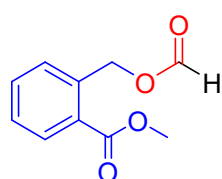

Eluent: PE : EA = 5:1; Colorless oil, 29.1 mg, 75% yield. <sup>1</sup>H NMR (400 MHz, CDCl<sub>3</sub>)  $\delta$  8.19 (s, 1H), 8.01 (d,  $J$  = 8.3 Hz, 1H), 7.57 – 7.51 (m, 2H), 7.43 – 7.37 (m, 1H), 5.63 (s, 2H), 3.91 (s, 3H); <sup>13</sup>C NMR (100 MHz, CDCl<sub>3</sub>)  $\delta$  167.0, 160.6, 136.9, 132.5, 131.0, 128.6, 128.1, 127.7, 64.0, 52.2; HRMS (ESI):  $m/z$  [M+H]<sup>+</sup> calcd for C<sub>10</sub>H<sub>11</sub>O<sub>4</sub><sup>+</sup>: 195.0652; found: 195.0647.

### 3-Chlorobenzyl formate (2p)<sup>[2]</sup>

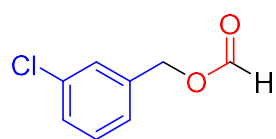

Eluent: PE : EA = 20:1; Colorless oil, 30.3 mg, 89% yield. <sup>1</sup>H NMR (400 MHz, CDCl<sub>3</sub>)  $\delta$  8.16 (s, 1H), 7.39 (s, 1H), 7.33 (d,  $J$  = 5.3 Hz, 2H), 7.27 (d, 1H), 5.19 (s, 2H); <sup>13</sup>C NMR (100 MHz, CDCl<sub>3</sub>)  $\delta$  160.5, 137.2, 134.5, 129.9, 128.6, 128.2, 126.2, 64.7.

### 3,5-Bromobenzyl formate (2q)

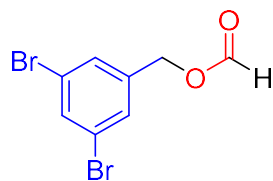

Eluent: PE : EA = 10:1; Yellow oil, 52.3 mg, 90% yield. <sup>1</sup>H NMR (400 MHz, CDCl<sub>3</sub>) δ 8.14 (s, 1H), 7.63 (t, *J* = 1.7 Hz, 1H), 7.45 (d, *J* = 1.7 Hz, 2H), 5.13 (s, 2H); <sup>13</sup>C NMR (100 MHz, CDCl<sub>3</sub>) δ 160.2, 139.0, 134.0, 129.7, 123.1, 63.7; HRMS (ESI): *m/z* [M+H]<sup>+</sup> calcd for C<sub>8</sub>H<sub>5</sub>Br<sub>2</sub>O<sub>2</sub><sup>+</sup>: 292.8641; found: 292.8643.

### Pyridin-2-ylmethyl formate (2r)<sup>[7]</sup>

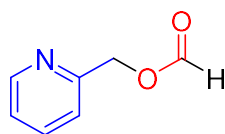

Eluent: PE : EA = 5:1; Yellow oil, 13.7 mg, 50% yield. <sup>1</sup>H NMR (400 MHz, CDCl<sub>3</sub>) δ 8.60 (d, *J* = 4.7 Hz, 1H), 8.20 (s, 1H), 7.74 – 7.68 (m, 1H), 7.36 (d, *J* = 7.8 Hz, 1H), 7.26 – 7.21 (m, 1H), 5.31 (s, 2H); <sup>13</sup>C NMR (100 MHz, CDCl<sub>3</sub>) δ 160.5, 155.0, 149.5, 136.8, 123.1, 121.9, 66.1.

### Benzhydryl formate (2s)<sup>[4]</sup>

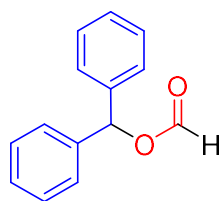

Eluent: PE : EA = 10:1; Colorless oil, 23.3 mg, 55% yield. <sup>1</sup>H NMR (400 MHz, CDCl<sub>3</sub>) δ 8.25 (s, 1H), 7.42 – 7.33 (m, 10H), 7.05 (s, 1H); <sup>13</sup>C NMR (100 MHz, CDCl<sub>3</sub>) δ 159.9, 139.5, 128.5, 128.1, 127.1, 76.5.

### 1,2-Phenylenebis(methylene) diformate (2t)

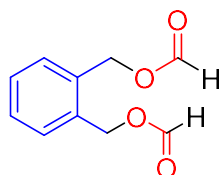

Eluent: PE : EA = 5:1; Colorless oil, 31.0 mg, 80% yield. <sup>1</sup>H NMR (400 MHz, CDCl<sub>3</sub>) δ 8.12 (s, 2H), 7.45 – 7.41 (m, 2H), 7.40 – 7.36 (m, 2H), 5.31 (s, 4H); <sup>13</sup>C NMR (100 MHz, CDCl<sub>3</sub>) δ 160.5, 133.8, 130.0, 129.0, 63.0; HRMS (ESI): *m/z* [M+Na]<sup>+</sup> calcd for C<sub>10</sub>H<sub>10</sub>O<sub>4</sub>Na<sup>+</sup>: 217.0471; found:

217.0467.

### (5-(Bromomethyl)-1,3-phenylene)bis(methylene) diformate (2u)

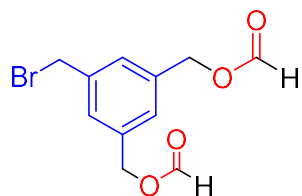

Eluent: PE : EA = 3:1; Yellow oil, 49.2 mg, 86% yield. <sup>1</sup>H NMR (400 MHz, CDCl<sub>3</sub>) δ 8.15 (s, 2H), 7.38 (s, 2H), 7.31 (s, 1H), 5.20 (s, 4H), 4.48 (s, 2H); <sup>13</sup>C NMR (100 MHz, CDCl<sub>3</sub>) δ 160.6, 138.8, 136.5, 128.8, 127.9, 64.8, 32.4; HRMS (ESI): *m/z* [M+Na]<sup>+</sup> calcd for C<sub>11</sub>H<sub>11</sub>BrO<sub>4</sub>Na<sup>+</sup>: 308.9733; found: 308.9727.

### Cinnamyl formate (2v)<sup>[1]</sup>

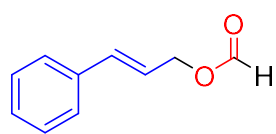

Eluent: PE : EA = 5:1; Colorless oil, 24.3 mg, 75% yield. <sup>1</sup>H NMR (400 MHz, CDCl<sub>3</sub>) δ 8.13 (s, 1H), 7.40 (d, *J* = 7.4 Hz, 2H), 7.34 (t, *J* = 7.4 Hz, 2H), 7.29 (t, *J* = 7.1 Hz, 1H), 6.70 (d, *J* = 15.9 Hz, 1H), 6.36 – 6.24 (m, 1H), 4.84 (d, *J* = 6.4 Hz, 2H); <sup>13</sup>C NMR (100 MHz, CDCl<sub>3</sub>) δ 160.7, 136.0, 134.8, 128.6, 128.2, 126.6, 122.4, 64.4.

### 2-Oxo-2-phenylethyl formate (2w)<sup>[8]</sup>

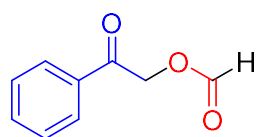

Eluent: PE : EA = 10:1; Yellow oil, 29.5 mg, 90% yield. <sup>1</sup>H NMR (400 MHz, CDCl<sub>3</sub>) δ 8.26 (s, 1H), 7.94 – 7.91 (m, 2H), 7.63 (t, *J* = 7.4 Hz, 1H), 7.50 (t, *J* = 7.7 Hz, 2H), 5.44 (s, 2H); <sup>13</sup>C NMR (100 MHz, CDCl<sub>3</sub>) δ 191.1, 160.0, 134.1, 133.9, 128.9, 127.8, 65.3.

### Phenethyl formate (2x)<sup>[9]</sup>

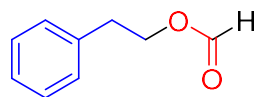

Eluent: PE : EA = 20:1; Light yellow oil, 18.3 mg, 61% yield. <sup>1</sup>H NMR (400 MHz, CDCl<sub>3</sub>) δ 8.04 (s, 1H), 7.32 (t, 2H), 7.25 (t, *J* = 7.4 Hz, 3H), 4.40 (t, *J* = 7.0 Hz, 2H), 2.99 (t, *J* = 7.0 Hz, 2H); <sup>13</sup>C NMR (100 MHz, CDCl<sub>3</sub>) δ 160.9, 137.4, 128.8, 128.6, 126.7, 64.4, 34.9.

### 4-Phenylbutyl formate (2y)<sup>[4]</sup>

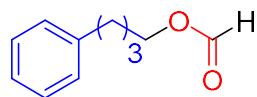

Eluent: PE : EA = 30:1; Yellow oil, 33.1 mg, 93% yield. <sup>1</sup>H NMR (400 MHz, CDCl<sub>3</sub>) δ 8.06 (s, 1H), 7.29 (t, *J* = 7.4 Hz, 2H), 7.20 (t, *J* = 7.5 Hz, 3H), 4.20 (t, 2H), 2.66 (t, 2H), 1.76 – 1.68 (m, 4H); <sup>13</sup>C NMR (100 MHz, CDCl<sub>3</sub>) δ 161.1, 141.8, 128.3(4), 128.2(7), 125.9, 35.3, 28.1, 27.6.

### 3-(4-Cyanophenyl)propyl formate (2z)

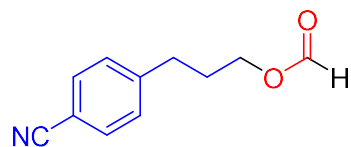

Eluent: PE : EA = 5:1; Colorless oil, 27.6 mg, 73 % yield. <sup>1</sup>H NMR (400 MHz, CDCl<sub>3</sub>) δ 8.06 (s, 1H), 7.57 (d, *J* = 8.2 Hz, 2H), 7.29 (d, *J* = 8.2 Hz, 2H), 4.17 (t, *J* = 6.4 Hz, 2H), 2.76 (t, 2H), 2.04 – 1.96 (m, 2H); <sup>13</sup>C NMR (100 MHz, CDCl<sub>3</sub>) δ 160.9, 146.5, 132.3, 129.1, 118.8, 110.1, 62.7, 32.2, 29.5; HRMS (ESI): *m/z* [M+H]<sup>+</sup> calcd for C<sub>11</sub>H<sub>12</sub>NO<sub>2</sub><sup>+</sup>: 190.0863; found: 190.0857.

### 3-Phenoxypropyl formate (2aa)

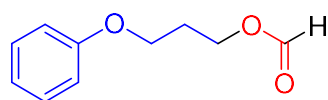

Eluent: PE : EA = 20:1; Colorless oil, 20.5 mg, 57% yield. <sup>1</sup>H NMR (400 MHz, CDCl<sub>3</sub>) δ 8.07 (s, 1H), 7.32 – 7.27 (m, 2H), 6.94 (dd, *J* = 25.1, 7.6 Hz, 3H), 4.39 (t, *J* = 6.2 Hz, 2H), 4.07 (t, *J* = 6.1 Hz, 2H), 2.16 (p, *J* = 6.2 Hz, 2H); <sup>13</sup>C NMR (100 MHz, CDCl<sub>3</sub>) δ 160.9, 158.7, 129.5, 120.9, 114.5, 63.9, 60.8, 28.5; HRMS (ESI): *m/z* [M+Na]<sup>+</sup> calcd for C<sub>10</sub>H<sub>12</sub>O<sub>3</sub>Na<sup>+</sup>: 203.0679; found: 203.0675.

### 3-(Formyloxy)propyl thiophene-2-carboxylate (2ab)

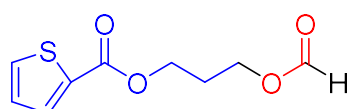

Eluent: PE : EA = 8:1; Yellow oil, 30.8 mg, 72 % yield. <sup>1</sup>H NMR (400 MHz, CDCl<sub>3</sub>) δ 8.06 (s, 1H), 7.79 (dd, *J* = 3.7, 1.2 Hz, 1H), 7.55 (dd, *J* = 5.0, 1.2 Hz, 1H), 7.09 (dd, *J* = 4.9, 3.8 Hz, 1H), 4.39 (t, *J* = 6.2 Hz, 2H), 4.31 (t, *J* = 6.2 Hz, 2H), 2.14 – 2.08 (m, 2H); <sup>13</sup>C NMR (100 MHz, CDCl<sub>3</sub>) δ 162.0, 160.8, 134.1, 133.5, 132.5, 127.7, 61.4, 60.5, 27.9; HRMS (ESI): *m/z* [M+H]<sup>+</sup> calcd for C<sub>9</sub>H<sub>11</sub>O<sub>4</sub>S<sup>+</sup>: 215.0373; found: 215.0367.

### 2-(1*H*-Indol-3-yl)ethyl formate (2ac)

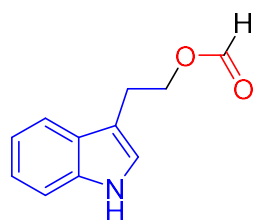

Eluent: PE : EA = 3:1; Yellow oil, 21.0 mg, 56 % yield. <sup>1</sup>H NMR (400 MHz, CDCl<sub>3</sub>) δ 8.10 (s, 1H), 7.67 (d, *J* = 7.9 Hz, 1H), 7.37 (d, *J* = 8.0 Hz, 1H), 7.26 – 7.22 (m, 1H), 7.18 (td, *J* = 7.5, 7.1, 1.1 Hz, 1H), 7.05 (d, *J* = 2.3 Hz, 1H), 4.49 (t, *J* = 7.5 Hz, 2H), 3.17 (t, *J* = 7.1 Hz, 2H); <sup>13</sup>C NMR (100 MHz, CDCl<sub>3</sub>) δ 161.1, 136.1, 127.2, 122.2, 122.1, 119.4, 118.6, 111.4, 111.2, 64.0, 24.6; HRMS (ESI): *m/z* [M+H]<sup>+</sup> calcd for C<sub>11</sub>H<sub>12</sub>NO<sub>2</sub><sup>+</sup>: 190.0863; found: 190.0857.

### 3-(1,3-Dioxoisindolin-2-yl)propyl formate (2ad)

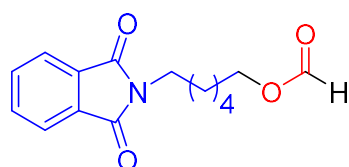

Eluent: PE : EA = 3:1; Colorless oil, 35.7 mg, 65% yield. <sup>1</sup>H NMR (400 MHz, CDCl<sub>3</sub>) δ 8.02 (s, 1H), 7.82 (dd, *J* = 5.4, 3.1 Hz, 2H), 7.69 (dd, *J* = 5.4, 3.0 Hz, 2H), 4.13 (t, *J* = 6.6 Hz, 2H), 3.67 (t, *J* = 7.2 Hz, 2H), 1.72 – 1.61 (m, 4H), 1.43 – 1.34 (m, 4H); <sup>13</sup>C NMR (100 MHz, CDCl<sub>3</sub>) δ 168.4, 161.1, 133.8, 132.1, 123.1, 63.8, 37.8, 28.4, 28.3, 26.3, 25.4; HRMS (ESI): *m/z* [M+H]<sup>+</sup> calcd for C<sub>15</sub>H<sub>18</sub>NO<sub>4</sub><sup>+</sup>: 276.1230; found: 276.1224.

### Cyclohexylmethyl Formate (2ae)<sup>[10]</sup>

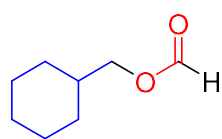

Eluent: PE : EA = 100:1; Colorless oil, 11.9 mg, 42% yield; <sup>1</sup>H

NMR (400 MHz, CDCl<sub>3</sub>) δ 8.05 (s, 1H), 3.96 (d, *J* = 6.5 Hz, 2H),  
1.76 – 1.63 (m, 6H), 1.26 – 1.12 (m, 3H), 0.96 (q, *J* = 11.5 Hz, 2H);

<sup>13</sup>C NMR (100 MHz, CDCl<sub>3</sub>) δ 161.2, 69.0, 36.9, 29.5, 26.2, 25.5.

### 4-Phenylbutan-2-yl formate (2af)

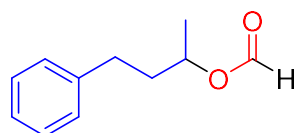

Eluent: PE : EA = 20:1; Colorless oil, 14.2 mg, 40 % yield. <sup>1</sup>H NMR

(400 MHz, CDCl<sub>3</sub>) δ 8.08 (s, 1H), 7.29 (t, *J* = 7.3 Hz, 2H), 7.22 –  
7.16 (m, 3H), 5.06 (dq, *J* = 11.8, 5.8 Hz, 1H), 2.74 – 2.58 (m, 2H),

2.01 – 1.81 (m, 2H), 1.30 (d, *J* = 6.3 Hz, 3H). <sup>13</sup>C NMR (100 MHz, CDCl<sub>3</sub>) δ 160.8, 141.2, 128.5,

128.3, 126.0, 70.5, 37.5, 31.6, 20.0; HRMS (ESI): *m/z* [M+H]<sup>+</sup> calcd for C<sub>18</sub>H<sub>19</sub>O<sub>5</sub><sup>+</sup>: 179.1067;

found: 179.1066.

### 3-(Formyloxy)propyl (S)-2-(6-methoxynaphthalen-2-yl)propanoate (2ah)

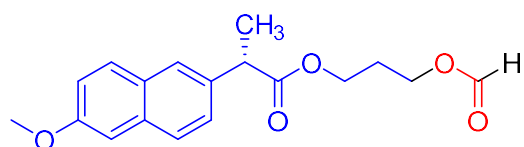

Eluent: PE : EA = 5:1; Colorless oil, 30.5 mg, 48 %

yield. <sup>1</sup>H NMR (400 MHz, CDCl<sub>3</sub>) δ 7.94 (s, 1H),

7.72 – 7.66 (m, 3H), 7.40 (dd, *J* = 8.4, 1.6 Hz,

1H), 7.17 – 7.12 (m, 2H), 4.18 (t, *J* = 6.2 Hz, 2H), 4.16 – 4.11 (m, 2H), 3.91 (s, 3H), 3.89 – 3.83

(m, 1H), 1.94 (p, *J* = 6.2 Hz, 2H), 1.59 (d, *J* = 7.2 Hz, 3H); <sup>13</sup>C NMR (100 MHz, CDCl<sub>3</sub>) δ 174.5,

160.7, 157.6, 135.5, 133.7, 129.2, 128.9, 127.1, 126.1, 125.9, 119.0, 105.6, 61.0, 60.4, 55.2, 45.4,

27.7, 18.4; HRMS (ESI): *m/z* [M+H]<sup>+</sup> calcd for C<sub>18</sub>H<sub>19</sub>O<sub>5</sub><sup>+</sup>: 315.1238; found: 315.1235.

### 4-Vinylbenzyl formate (2ai)

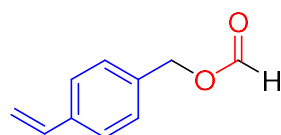

Eluent: PE : EA = 10:1; Colorless oil, 28.8 mg, 89% yield. <sup>1</sup>H NMR

(400 MHz, CDCl<sub>3</sub>) δ 8.14 (s, 1H), 7.42 (d, *J* = 8.1 Hz, 2H), 7.34 (d, *J* =

8.0 Hz, 2H), 6.72 (q, *J* = 17.6, 10.9 Hz, 1H), 5.77 (d, *J* = 17.6 Hz, 1H),

5.28 (d, *J* = 10.9 Hz, 1H), 5.19 (s, 2H); <sup>13</sup>C NMR (100 MHz, CDCl<sub>3</sub>) δ 160.7, 137.8, 136.2, 134.6,

128.6, 126.4, 114.5, 65.4; HRMS (ESI): *m/z* [M+H]<sup>+</sup> calcd for C<sub>10</sub>H<sub>11</sub>O<sub>2</sub><sup>+</sup>: 163.0754; found:

163.0752.

### 2-Iodobenzyl formate (2aj)<sup>[4]</sup>

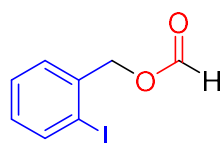

Eluent: PE : EA = 10:1; Colorless oil, 40.9 mg, 78% yield. <sup>1</sup>H NMR (400 MHz, CDCl<sub>3</sub>) δ 8.18 (s, 1H), 7.87 (d, *J* = 7.9 Hz, 1H), 7.43 – 7.34 (m, 2H), 7.04 (t, *J* = 8.2 Hz, 1H), 5.23 (s, 2H); <sup>13</sup>C NMR (100 MHz, CDCl<sub>3</sub>) δ 160.4, 139.5, 137.5, 130.1, 129.6, 128.4, 98.3, 69.4.

### 2,4,6-Trimethylbenzyl formate (2ak)

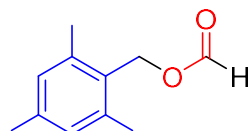

Eluent: PE : EA = 10:1; Colorless oil, 28.5 mg, 80% yield. <sup>1</sup>H NMR (400 MHz, CDCl<sub>3</sub>) δ 8.13 (s, 1H), 6.91 (s, 2H), 5.29 (s, 2H), 2.38 (s, 6H), 2.31 (s, 3H); <sup>13</sup>C NMR (100 MHz, CDCl<sub>3</sub>) δ 161.0, 138.7, 138.2, 129.1, 128.3, 60.3, 21.0, 19.4; HRMS (ESI): *m/z* [M+Na]<sup>+</sup> calcd for C<sub>11</sub>H<sub>14</sub>O<sub>2</sub>Na<sup>+</sup>: 201.0886; found: 201.0881.

### Naphthalen-1-ylmethyl formate (2al)<sup>[4]</sup>

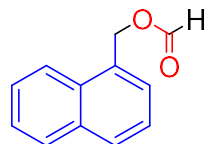

Eluent: PE : EA = 10:1; Yellow oil, 33.5 mg, 90% yield. <sup>1</sup>H NMR (400 MHz, CDCl<sub>3</sub>) δ 8.19 (s, 1H), 8.04 (d, *J* = 8.3 Hz, 1H), 7.90 (t, *J* = 8.8 Hz, 2H), 7.61 – 7.54 (m, 3H), 7.50 – 7.45 (m, 1H), 5.68 (s, 2H); <sup>13</sup>C NMR (100 MHz, CDCl<sub>3</sub>) δ 160.9, 133.8, 131.6, 130.7, 129.7, 128.8, 127.8, 126.8, 126.1, 125.3, 123.4, 64.0.

### Benzo[d]oxazol-2-ylmethyl formate (2am)

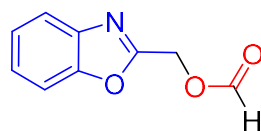

Eluent: PE : EA = 3:1; Colorless oil, 21.2 mg, 60% yield. <sup>1</sup>H NMR (400 MHz, CDCl<sub>3</sub>) δ 8.22 (s, 1H), 7.77 – 7.74 (m, 1H), 7.57 – 7.54 (m, 1H), 7.40 – 7.37 (m, 2H), 5.44 (s, 2H); <sup>13</sup>C NMR (100 MHz, CDCl<sub>3</sub>) δ 159.7, 150.9, 140.7, 134.2, 125.8, 124.8, 120.5, 110.9, 57.5; HRMS (ESI): *m/z* [M+H]<sup>+</sup> calcd for C<sub>9</sub>H<sub>8</sub>NO<sub>3</sub><sup>+</sup>: 178.0499; found: 178.0496.

### (6-(Chloromethyl)pyridin-2-yl)methyl formate (2an)

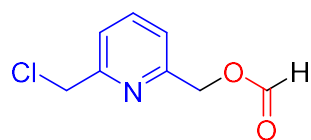

Eluent: PE : EA = 3:1; Yellow oil, 19.6 mg, 53% yield. <sup>1</sup>H NMR (400 MHz, CDCl<sub>3</sub>) δ 8.21 (s, 1H), 7.74 (t, *J* = 7.8 Hz, 1H), 7.45 (d, *J* = 7.7 Hz, 1H), 7.32 (d, *J* = 7.7 Hz, 1H), 5.30 (s, 2H), 4.66 (s, 2H); <sup>13</sup>C NMR (100 MHz, CDCl<sub>3</sub>) δ 160.4, 156.6, 154.7, 137.9, 122.1, 121.1, 65.9, 46.4; HRMS (ESI): *m/z* [M+H]<sup>+</sup> calcd for C<sub>8</sub>H<sub>9</sub>ClNO<sub>2</sub><sup>+</sup>: 186.0316; found: 186.0312.

### Bis(4-fluorophenyl)methyl formate (2a)

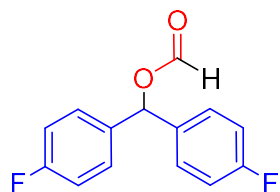

Eluent: PE : EA = 10:1; Colorless oil, 22.3 mg, 45% yield.  $^1\text{H}$  NMR (400 MHz,  $\text{CDCl}_3$ )  $\delta$  8.21 (s, 1H), 7.34 – 7.29 (m, 4H), 7.05 (t,  $J$  = 8.6 Hz, 4H), 6.97 (s, 1H);  $^{13}\text{C}$  NMR (100 MHz, Chloroform- $d$ )  $\delta$  162.5 (d,  $J$  = 247.4 Hz), 159.8, 135.1 (d,  $J$  = 3.3 Hz), 128.9 (d,  $J$  = 8.3 Hz), 115.6 (d,  $J$  = 21.7 Hz), 75.1; HRMS (ESI):  $m/z$   $[\text{M}+\text{H}]^+$  calcd for  $\text{C}_{14}\text{H}_{11}\text{F}_2\text{O}_2^+$ : 249.0722; found: 249.0725.

### Methyl (naphthalen-2-ylmethyl) carbonate (3a)<sup>[11]</sup>

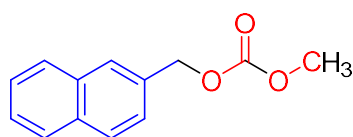

Eluent: PE : EA = 10:1; White solid, 35.8 mg, 83% yield. m.p. 49 – 51 °C;  $^1\text{H}$  NMR (400 MHz,  $\text{CDCl}_3$ )  $\delta$  7.88 – 7.83 (m, 4H), 7.52 – 7.47 (m, 3H), 5.34 (s, 2H), 3.82 (s, 3H);  $^{13}\text{C}$  NMR (100 MHz,  $\text{CDCl}_3$ )  $\delta$  155.7, 133.2, 133.1, 132.6, 128.4, 128.0, 127.7, 127.5, 126.4, 126.3, 125.7, 69.7, 54.9.

### Benzyl methyl carbonate (3b)<sup>[12]</sup>

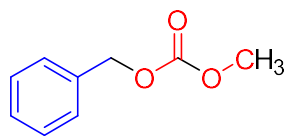

Eluent: PE : EA = 20:1; Yellow oil, 23.2 mg, 70% yield.  $^1\text{H}$  NMR (400 MHz,  $\text{CDCl}_3$ )  $\delta$  7.40 – 7.33 (m, 5H), 5.17 (s, 2H), 3.80 (s, 3H);  $^{13}\text{C}$  NMR (100 MHz,  $\text{CDCl}_3$ )  $\delta$  155.7, 135.2, 128.6, 128.5, 128.3, 69.6, 54.8.

### Methyl (4-methylbenzyl) carbonate (3c)<sup>[13]</sup>

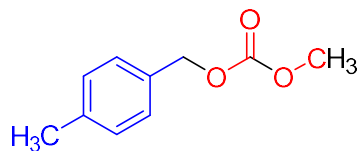

Eluent: PE : EA = 20:1; Yellow oil, 26.3 mg, 73% yield.  $^1\text{H}$  NMR (400 MHz,  $\text{CDCl}_3$ )  $\delta$  7.28 (d,  $J$  = 8.0 Hz, 2H), 7.18 (d,  $J$  = 7.9 Hz, 2H), 5.13 (s, 2H), 3.79 (s, 3H), 2.35 (s, 3H);  $^{13}\text{C}$  NMR (100 MHz,  $\text{CDCl}_3$ )  $\delta$  155.7, 138.4, 132.2, 129.2, 128.5, 69.6, 54.8, 21.2.

### 4-(Tert-butyl)benzyl methyl carbonate (3d)<sup>[14]</sup>

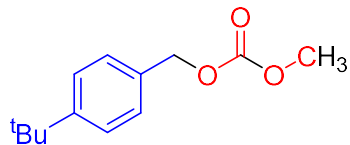

Eluent: PE : EA = 10:1; Colorless oil, 30.2 mg, 68% yield.  $^1\text{H}$  NMR (400 MHz,  $\text{CDCl}_3$ )  $\delta$  7.41 (d,  $J$  = 8.4 Hz, 2H), 7.34 (d,  $J$  = 8.3 Hz, 2H), 5.15 (s, 2H), 3.80 (s, 3H), 1.33 (s, 9H);  $^{13}\text{C}$  NMR (100 MHz,  $\text{CDCl}_3$ )  $\delta$  155.7, 151.6, 132.2, 128.2, 125.5, 69.5, 54.8, 34.6, 31.2.

### Methyl (4-(trifluoromethoxy)benzyl) carbonate (3e)

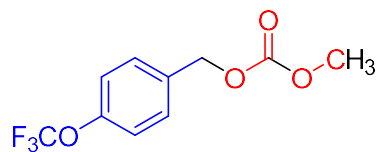

Eluent: PE : EA = 5:1; Yellow oil, 34.0 mg, 68% yield.  $^1\text{H}$  NMR (400 MHz,  $\text{CDCl}_3$ )  $\delta$  7.43 (d,  $J$  = 8.7 Hz, 2H), 7.22 (d,  $J$  = 8.1 Hz, 2H), 5.16 (s, 2H), 3.81 (s, 3H);  $^{13}\text{C}$  NMR (100 MHz,  $\text{CDCl}_3$ )  $\delta$  155.6, 149.2 (d,  $J$  = 1.9 Hz), 134.0 (d,  $J$  = 19.0 Hz), 129.8, 127.7 (d,  $J$  = 5.5 Hz), 121.1, 68.6, 55.0; HRMS (ESI):  $m/z$   $[\text{M}+\text{H}]^+$  calcd for  $\text{C}_{10}\text{H}_9\text{F}_3\text{O}_4^+$ : 250.0453; found: 250.0462.

### 4-Fluorobenzyl methyl carbonate (3f)

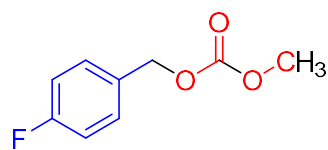

Eluent: PE : EA = 10:1; Colorless oil, 25.4 mg, 69% yield.  $^1\text{H}$  NMR (400 MHz,  $\text{CDCl}_3$ )  $\delta$  7.37 (dd,  $J$  = 8.4, 5.4 Hz, 2H), 7.05 (t,  $J$  = 8.6 Hz, 2H), 5.12 (s, 2H), 3.79 (s, 3H);  $^{13}\text{C}$  NMR (100 MHz,  $\text{CDCl}_3$ )  $\delta$  162.8 (d,  $J$  = 247.2 Hz), 155.6, 131.1 (d,  $J$  = 3.3 Hz), 130.4 (d,  $J$  = 8.4 Hz), 115.5 (d,  $J$  = 21.6 Hz), 68.9, 54.9; HRMS (ESI):  $m/z$   $[\text{M}+\text{NH}_3]^+$  calcd for  $\text{C}_9\text{H}_{13}\text{F}_1\text{O}_3\text{N}_1^+$ : 202.08714; found: 202.0871.

### 4-Chlorobenzyl methyl carbonate (3g)

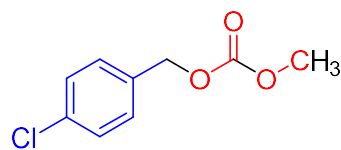

Eluent: PE : EA = 10:1; Colorless oil, 28.8 mg, 72% yield.  $^1\text{H}$  NMR (400 MHz,  $\text{CDCl}_3$ )  $\delta$  7.33 (d,  $J$  = 2.5 Hz, 4H), 5.12 (s, 2H), 3.80 (s, 3H);  $^{13}\text{C}$  NMR (100 MHz,  $\text{CDCl}_3$ )  $\delta$  155.6, 134.5, 133.7, 129.7, 128.8, 68.7, 55.0; HRMS (ESI):  $m/z$   $[\text{M}+\text{H}]^+$  calcd for  $\text{C}_9\text{H}_8\text{ClO}_3^+$ : 199.0167; found: 199.0161.

### Methyl (4-(trifluoromethyl)benzyl) carbonate (3h)

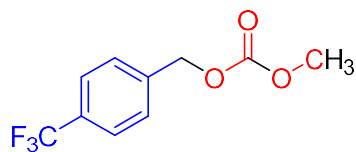

Eluent: PE : EA = 3:1; Colorless oil, 23.4 mg, 50% yield.  $^1\text{H}$  NMR (400 MHz,  $\text{CDCl}_3$ )  $\delta$  7.64 (d,  $J$  = 8.1 Hz, 2H), 7.50 (d,  $J$  = 8.0 Hz, 2H), 5.22 (s, 2H), 3.82 (s, 3H);  $^{13}\text{C}$  NMR (100 MHz,  $\text{CDCl}_3$ )  $\delta$  155.6, 139.2, 134.1, 128.1, 127.7, 125.6 (q,  $J$  = 3.8 Hz), 68.51, 55.08; HRMS (ESI):  $m/z$   $[\text{M}+\text{H}]^+$  calcd for  $\text{C}_{10}\text{H}_{10}\text{F}_3\text{O}_3^+$ : 233.0431; found: 233.0426.

### 4-Cyanobenzyl methyl carbonate (3i)<sup>[14]</sup>

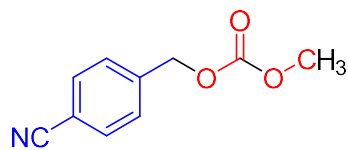

Eluent: PE : EA = 3:1; White solid, 24.9 mg, 65% yield. m.p. 95 - 97 °C;  $^1\text{H}$  NMR (400 MHz,  $\text{CDCl}_3$ )  $\delta$  7.66 (d,  $J$  = 8.3 Hz, 2H), 7.48 (d,  $J$  = 8.3 Hz, 2H), 5.20 (s, 2H), 3.81 (s, 3H);  $^{13}\text{C}$  NMR (100 MHz,  $\text{CDCl}_3$ )  $\delta$  155.4, 140.5, 132.4, 128.2, 118.5, 112.3, 68.2, 55.2.

### 4-Acetylbenzyl methyl carbonate (3j)

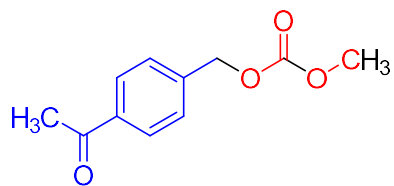

Eluent: PE : EA =5:1; Colorless oil, 20.0 mg, 48% yield. <sup>1</sup>H NMR (400 MHz, CDCl<sub>3</sub>) δ 7.96 (d, *J* = 8.2 Hz, 2H), 7.46 (d, *J* = 8.2 Hz, 2H), 5.21 (s, 2H), 3.81 (s, 3H), 2.60 (s, 3H); <sup>13</sup>C NMR (100 MHz, CDCl<sub>3</sub>) δ 197.6, 155.6, 140.4, 137.0, 128.6, 127.9, 68.7, 55.0, 26.6; HRMS (ESI): *m/z* [M+H]<sup>+</sup> calcd for C<sub>11</sub>H<sub>13</sub>O<sub>4</sub><sup>+</sup>: 209.0808; found: 209.0807.

### [1,1'-Biphenyl]-4-ylmethyl methyl carbonate (3k)

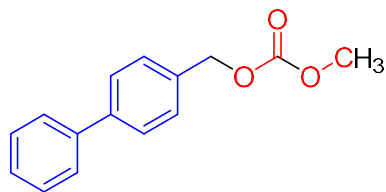

Eluent: PE : EA =5:1; Yellow solid, 34.8 mg, 72% yield. m.p. 91 - 93 °C; <sup>1</sup>H NMR (400 MHz, CDCl<sub>3</sub>) δ 7.64 – 7.61 (m, 4H), 7.49 (dd, *J* = 7.6, 5.2 Hz, 4H), 7.41 – 7.38 (m, 1H), 5.24 (s, 2H), 3.84 (s, 3H); <sup>13</sup>C NMR (100 MHz, CDCl<sub>3</sub>) δ 155.7, 141.4, 140.5, 134.2, 134.1, 128.7, 127.4, 127.3, 127.1, 69.3, 54.8; HRMS (ESI): *m/z* [M+H]<sup>+</sup> calcd for C<sub>15</sub>H<sub>13</sub>O<sub>3</sub><sup>+</sup>: 241.0870; found: 241.0869.

### (2'-Cyano-[1,1'-biphenyl]-4-yl)methyl methyl carbonate (3l)

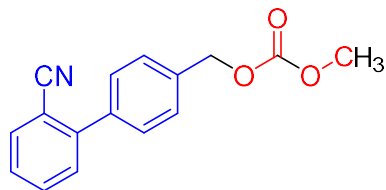

Eluent: PE : EA =5:1; Colorless oil, 31.5 mg, 59% yield. <sup>1</sup>H NMR (400 MHz, CDCl<sub>3</sub>) δ 7.78 – 7.75 (m, 1H), 7.66 – 7.62 (m, 1H), 7.57 (d, *J* = 8.3 Hz, 2H), 7.50 (dd, *J* = 8.1, 3.8 Hz, 3H), 7.47 – 7.43 (m, 1H), 5.23 (s, 2H), 3.82 (s, 3H); <sup>13</sup>C NMR (100 MHz, CDCl<sub>3</sub>) δ 155.6, 144.8, 138.2, 135.7, 133.7, 132.8, 130.0, 129.0, 128.5, 127.7, 118.5, 111.1, 69.0, 54.9; HRMS (ESI): *m/z* [M+H]<sup>+</sup> calcd for C<sub>16</sub>H<sub>12</sub>NO<sub>3</sub><sup>+</sup>: 266.0823; found: 266.0822.

### Methyl 4'-(((methoxycarbonyloxy)methyl)-[1,1'-biphenyl]-2-carboxylate (3m)

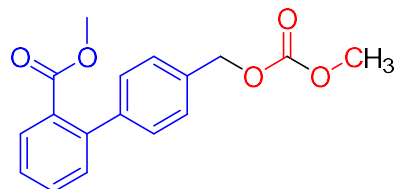

Eluent: PE : EA =5:1; Colorless oil, 21.2 mg, 55% yield. <sup>1</sup>H NMR (400 MHz, CDCl<sub>3</sub>) δ 7.85 (dd, *J* = 7.7, 1.1 Hz, 1H), 7.52 (td, *J* = 7.6, 1.4 Hz, 1H), 7.42 (d, *J* = 8.0 Hz, 3H), 7.36 – 7.31 (m, 3H), 5.22 (s, 2H), 3.81 (s, 3H), 3.65 (s, 3H); <sup>13</sup>C NMR (100 MHz, CDCl<sub>3</sub>) δ 168.7, 155.6, 141.9, 141.5, 134.1, 131.3, 130.6(4), 130.5(5), 129.8, 128.5, 127.9, 127.2, 69.3, 54.8, 51.9; HRMS (ESI): *m/z* [M+H]<sup>+</sup> calcd for C<sub>17</sub>H<sub>15</sub>O<sub>5</sub><sup>+</sup>: 299.0925; found: 299.0922.

### Methyl (2-methylbenzyl) carbonate (3n)<sup>[15]</sup>

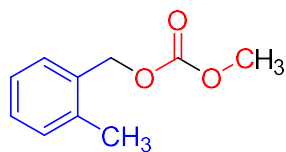

Eluent: PE : EA = 15:1; Colorless oil, 28.8 mg, 80% yield. <sup>1</sup>H NMR (400 MHz, CDCl<sub>3</sub>) δ 7.38 – 7.34 (m, 1H), 7.29 – 7.24 (m, 1H), 7.21 (t, *J* = 5.5 Hz, 2H), 5.20 (s, 2H), 3.80 (s, 3H), 2.38 (s, 3H); <sup>13</sup>C NMR (100 MHz, CDCl<sub>3</sub>) δ 155.7, 137.0, 133.2, 130.3, 129.3, 128.8, 126.0, 68.0, 54.8, 18.8.

### 2-Chlorobenzyl methyl carbonate (3o)

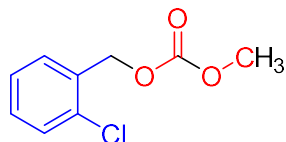

Eluent: PE : EA = 10:1; Yellow oil, 23.3 mg, 58% yield. <sup>1</sup>H NMR (400 MHz, CDCl<sub>3</sub>) δ 7.47 – 7.43 (m, 1H), 7.41 – 7.38 (m, 1H), 7.30 – 7.26 (m, 2H), 5.29 (s, 2H), 3.82 (s, 3H); <sup>13</sup>C NMR (100 MHz, CDCl<sub>3</sub>) δ 155.5, 133.6, 133.0, 129.8, 129.7, 129.6, 126.9, 66.8, 55.0; HRMS (ESI): *m/z* [M+H]<sup>+</sup> calcd for C<sub>9</sub>H<sub>10</sub>ClO<sub>3</sub><sup>+</sup>: 201.0313; found: 201.0311.

### 2-Bromobenzyl methyl carbonate (3p)

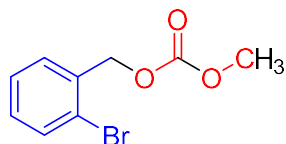

Eluent: PE : EA = 10:1; Brown oil, 31.7 mg, 65% yield. <sup>1</sup>H NMR (400 MHz, CDCl<sub>3</sub>) δ 7.58 (d, *J* = 8.0 Hz, 1H), 7.44 (d, *J* = 7.4 Hz, 1H), 7.32 (t, *J* = 7.5 Hz, 1H), 7.20 (t, *J* = 7.7 Hz, 1H), 5.26 (s, 2H), 3.82 (s, 3H); <sup>13</sup>C NMR (100 MHz, CDCl<sub>3</sub>) δ 155.5, 134.6, 132.8, 129.9, 129.7, 127.5, 123.2, 68.9, 55.0; HRMS (ESI): *m/z* [M+H]<sup>+</sup> calcd for C<sub>9</sub>H<sub>10</sub>BrO<sub>3</sub><sup>+</sup>: 244.9808; found: 244.9806.

### 2-Iodobenzyl methyl carbonate (3q)

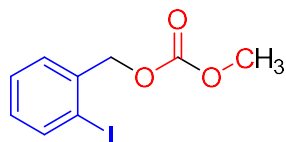

Eluent: PE : EA = 8:1; Colorless oil, 36.2 mg, 58% yield. <sup>1</sup>H NMR (400 MHz, CDCl<sub>3</sub>) δ 7.85 (d, *J* = 7.7 Hz, 1H), 7.41 (d, *J* = 7.5 Hz, 1H), 7.35 (t, *J* = 7.4 Hz, 1H), 7.03 (t, *J* = 7.6 Hz, 1H), 5.19 (s, 2H), 3.83 (s, 3H); <sup>13</sup>C NMR (100 MHz, CDCl<sub>3</sub>) δ 155.4, 139.5, 137.7, 130.0, 129.3, 128.4, 98.0, 73.1, 55.0; HRMS (ESI): *m/z* [M+H]<sup>+</sup> calcd for C<sub>9</sub>H<sub>10</sub>IO<sub>3</sub><sup>+</sup>: 292.9669; found: 292.9668.

### 2-Cyano-5-fluorobenzyl methyl carbonate (3r)

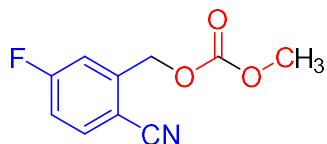

Eluent: PE : EA = 5:1; Colorless oil, 27.6 mg, 66% yield. <sup>1</sup>H NMR (400 MHz, CDCl<sub>3</sub>) δ 7.70 (dd, *J* = 8.6, 5.3 Hz, 1H), 7.29 (dd, *J* = 8.9, 2.5 Hz, 1H), 7.14 (td, *J* = 8.2, 2.5 Hz, 1H), 5.34 (s, 2H), 3.84 (s, 3H); <sup>13</sup>C NMR (100 MHz, CDCl<sub>3</sub>) δ 165.0 (d, *J* = 257.4 Hz), 155.1, 142.2 (d, *J* = 9.0 Hz), 135.3 (d, *J* = 9.5 Hz), 116.5 (d, *J* = 3.2 Hz), 116.3 (d, *J* = 4.4 Hz), 116.0, 107.5 (d, *J* = 3.6 Hz), 66.1 (d, *J* = 1.4 Hz), 55.4; HRMS (ESI): *m/z* [M+H]<sup>+</sup> calcd for C<sub>10</sub>H<sub>9</sub>FNO<sub>3</sub><sup>+</sup>: 210.0561; found: 210.0560.

### 3,5-Bromobenzyl methyl carbonate (3s)

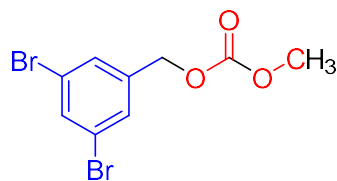

Eluent: PE : EA = 5:1; White solid, 32.8 mg, 51% yield. m.p. 69 - 71 °C; <sup>1</sup>H NMR (400 MHz, CDCl<sub>3</sub>) δ 7.63 (t, *J* = 1.7 Hz, 1H), 7.46 (d, *J* = 1.6 Hz, 2H), 5.08 (s, 2H), 3.82 (s, 3H); <sup>13</sup>C NMR (100 MHz, CDCl<sub>3</sub>) δ 155.4, 139.0, 134.2, 134.1, 129.8, 129.6, 123.1, 67.6, 55.2; HRMS (ESI): *m/z* [M+H]<sup>+</sup> calcd for C<sub>9</sub>H<sub>7</sub>Br<sub>2</sub>O<sub>3</sub><sup>+</sup>: 322.8747; found: 322.8745.

### Anthracen-9-ylmethyl methyl carbonate (3t)

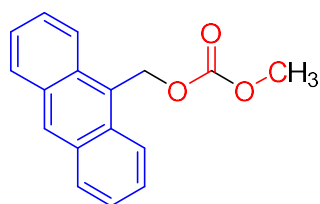

Eluent: PE : EA = 5:1; Yellow solid, 15.9 mg, 30% yield. m.p. 88 - 90 °C; <sup>1</sup>H NMR (400 MHz, CDCl<sub>3</sub>) δ 8.51 (s, 1H), 8.40 (d, *J* = 8.9 Hz, 2H), 8.02 (d, *J* = 8.4 Hz, 2H), 7.62 – 7.57 (m, 2H), 7.53 – 7.47 (m, 2H), 6.23 (s, 2H), 3.81 (s, 3H); <sup>13</sup>C NMR (100 MHz, CDCl<sub>3</sub>) δ 156.0, 131.3, 131.1, 129.5, 129.0, 126.8, 125.3, 125.1, 123.8, 62.3, 54.9; HRMS (ESI): *m/z* [M+H]<sup>+</sup> calcd for C<sub>17</sub>H<sub>14</sub>O<sub>3</sub><sup>+</sup>: 266.0943; found: 266.0937.

### 1,3-Phenylenebis(methylene) dimethyl bis(carbonate) (3u)

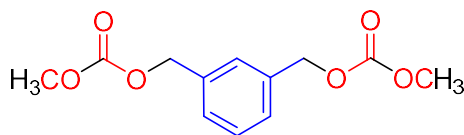

Eluent: PE : EA = 5:1; Yellow oil, 27.9 mg, 55% yield. <sup>1</sup>H NMR (400 MHz, CDCl<sub>3</sub>) δ 7.40 (s, 1H), 7.37 (d, *J* = 4.0 Hz, 3H), 5.16 (s, 4H), 3.80 (s, 6H); <sup>13</sup>C NMR (100 MHz, CDCl<sub>3</sub>) δ 155.6, 135.7, 128.9, 128.3, 128.0, 69.2, 54.9; HRMS (ESI): *m/z* [M+H]<sup>+</sup> calcd for C<sub>12</sub>H<sub>15</sub>O<sub>6</sub><sup>+</sup>: 255.0863; found: 255.0862.

### Cinnamyl methyl carbonate (3v)<sup>[16]</sup>

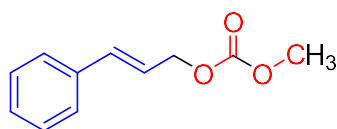

Eluent: PE : EA = 5:1; Colorless oil, 21.2 mg, 55% yield. <sup>1</sup>H NMR (400 MHz, CDCl<sub>3</sub>) δ 7.40 (d, *J* = 7.1 Hz, 2H), 7.33 (t, *J* = 7.3 Hz, 2H), 7.29 – 7.26 (m, 1H), 6.70 (d, *J* = 15.9 Hz, 1H), 6.34 – 6.27 (m, 1H), 4.80 (d, *J* = 7.7 Hz, 2H), 3.81 (s, 3H); <sup>13</sup>C NMR (100 MHz, CDCl<sub>3</sub>) δ 155.6, 136.0, 134.8, 128.6, 128.2, 126.7, 122.4, 68.4, 54.8.

### 4-Bromobenzyl methyl carbonate (3w)

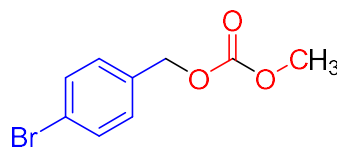

Eluent: PE : EA = 10:1; White solid, 23.9 mg, 49% yield. m.p. 49 - 52 °C; <sup>1</sup>H NMR (400 MHz, CDCl<sub>3</sub>) δ 7.49 (d, *J* = 8.3 Hz, 2H), 7.27 (s, 1H), 7.24 (d, *J* = 4.9 Hz, 1H), 5.10 (s, 2H), 3.80 (s, 3H);

$^{13}\text{C}$  NMR (100 MHz,  $\text{CDCl}_3$ )  $\delta$  155.6, 134.2, 131.7, 129.9, 122.6, 68.7, 55.0; HRMS (ESI):  $m/z$   $[\text{M}+\text{H}]^+$  calcd for  $\text{C}_9\text{H}_8\text{BrO}_3^+$ : 242.9662; found: 242.9655.

#### Methyl (4-vinylbenzyl) carbonate (3x)

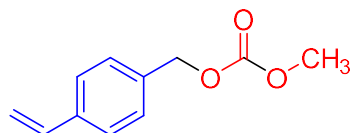

Eluent: PE : EA =5:1; Colorless oil, 17.3 mg, 45% yield.  $^1\text{H}$  NMR (400 MHz,  $\text{CDCl}_3$ )  $\delta$  7.41 (d,  $J$  = 8.1 Hz, 2H), 7.35 (d,  $J$  = 8.1 Hz, 2H), 6.72 (dd,  $J$  = 17.6, 10.9 Hz, 1H), 5.77 (d,  $J$  = 17.6

Hz, 1H), 5.27 (d,  $J$  = 10.9 Hz, 1H), 5.15 (s, 2H), 3.80 (s, 3H);  $^{13}\text{C}$  NMR (100 MHz,  $\text{CDCl}_3$ )  $\delta$  155.8, 137.9, 136.3, 134.7, 128.6, 126.4, 114.5, 69.4, 54.9; HRMS (ESI):  $m/z$   $[\text{M}+\text{H}]^+$  calcd for  $\text{C}_{11}\text{H}_{13}\text{O}_3^+$ : 193.0859; found: 193.0858.

#### 3-Fluorobenzyl methyl carbonate (3y)<sup>[17]</sup>

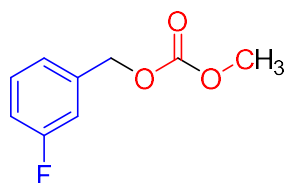

Eluent: PE : EA =10:1; Yellow oil, 18.4 mg, 50% yield.  $^1\text{H}$  NMR (400 MHz,  $\text{CDCl}_3$ )  $\delta$  7.35 – 7.32 (m, 1H), 7.15 (d,  $J$  = 7.7 Hz, 1H), 7.10 (d,  $J$  = 9.5 Hz, 1H), 7.05 – 7.01 (m, 1H), 5.15 (s, 2H), 3.81 (s, 3H);  $^{13}\text{C}$  NMR (100 MHz,  $\text{CDCl}_3$ )  $\delta$  162.8 (d,  $J$  = 246.6 Hz), 155.6, 137.7 (d,  $J$  = 7.5 Hz), 130.2 (dd,  $J$  = 8.2, 3.2 Hz), 123.6 (dd,  $J$  = 5.9, 3.1 Hz), 115.4 (d,  $J$  = 21.1 Hz), 115.0 (d,  $J$  = 22.0 Hz), 68.7 (d,  $J$  = 2.0 Hz), 55.0.

#### 2-Cyanobenzyl methyl carbonate (3z)

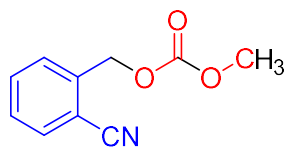

Eluent: PE : EA =5:1; Colorless oil, 23.9 mg, 60% yield.  $^1\text{H}$  NMR (400 MHz,  $\text{CDCl}_3$ )  $\delta$  7.69 (d,  $J$  = 7.7 Hz, 1H), 7.62 (t,  $J$  = 7.6 Hz, 1H), 7.57 (t,  $J$  = 7.1 Hz, 1H), 7.45 (t,  $J$  = 8.1 Hz, 1H), 5.35 (s, 2H), 3.83 (s,

3H);  $^{13}\text{C}$  NMR (100 MHz,  $\text{CDCl}_3$ )  $\delta$  155.3, 138.6, 134.1, 133.0 (d,  $J$  = 1.8 Hz), 129.1 (d,  $J$  = 22.4 Hz), 127.7, 116.8, 112.0, 66.8, 55.2; HRMS (ESI):  $m/z$   $[\text{M}+\text{H}]^+$  calcd for  $\text{C}_{10}\text{H}_{10}\text{NO}_3^+$ : 192.0655; found: 192.0654.

#### Methyl (2,4,6-trimethylbenzyl) carbonate (3aa)

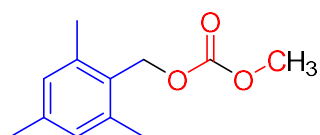

Eluent: PE : EA =10:1; Yellow oil, 29.9 mg, 72% yield.  $^1\text{H}$  NMR (400 MHz,  $\text{CDCl}_3$ )  $\delta$  6.88 (s, 2H), 5.25 (s, 2H), 3.78 (s, 3H), 2.38 (s, 6H), 2.27 (s, 3H);  $^{13}\text{C}$  NMR (100 MHz,  $\text{CDCl}_3$ )  $\delta$  155.9, 138.7,

138.3, 129.0, 128.3, 64.5, 54.7, 21.0, 19.5; HRMS (ESI):  $m/z$   $[\text{M}+\text{H}]^+$  calcd for  $\text{C}_{12}\text{H}_{15}\text{O}_3^+$ : 207.1027; found: 207.1022.

**Methyl (naphthalen-1-ylmethyl) carbonate (3ab)**

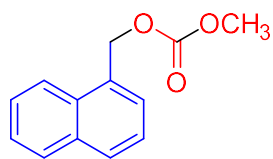

Eluent: PE : EA =10:1; Yellow oil, 31.1 mg, 72% yield.  $^1\text{H}$  NMR (400 MHz,  $\text{CDCl}_3$ )  $\delta$  8.07 (d,  $J$  = 8.3 Hz, 1H), 7.90 (t,  $J$  = 8.1 Hz, 2H), 7.61 – 7.53 (m, 3H), 7.47 (t, 1H), 5.66 (s, 2H), 3.82 (s, 3H);  $^{13}\text{C}$  NMR (100 MHz,  $\text{CDCl}_3$ )  $\delta$  155.8, 133.8, 131.6, 130.8, 129.7, 128.8, 127.8, 126.8, 126.1, 125.3, 123.5, 68.0, 55.0; HRMS (ESI):  $m/z$   $[\text{M}+\text{H}]^+$  calcd for  $\text{C}_{13}\text{H}_{12}\text{O}_3^+$ : 216.0786; found: 216.0781.

## I. Reference

- [1] B. Zhang, G. Du, W. Hang, S. Wang, C. Xi, Lewis Base Promoted Reduction of CO<sub>2</sub> with BH<sub>3</sub>NH<sub>3</sub> into Boryl Formates: CO<sub>2</sub> as a Carbon Source in Organic Synthesis Under Mild Conditions [J]. *Eur. J. Org. Chem.*, 2018, 1739–1743.
- [2] K. Niknam, M. A. Zolfigol, D. Saberi, M. Khonbazi, 1-Butyl-3-methylimidazolium Hydrogen Sulfate [bmim]HSO<sub>4</sub>: An Efficient Reusable Acidic Ionic Liquid for the Formylation of Alcohols [J]. *Chin. J. Chem.*, 2009, **27**, 1548–1552.
- [3] Z. Li, J. Chu, D. Meng, Y. Li, Photocatalytic Chemical CO<sub>2</sub> Fixation by Cu-BDC Nanosheet@Macroporous–Mesoporous-TiO<sub>2</sub> under Mild Conditions [J]. *ACS Catal.*, 2019, **9**, 8659–8668.
- [4] W.-Y. Fang, G.-F. Zha, H.-L. Qin, Making Carbonyls of Amides Nucleophilic and Hydroxyls of Alcohols Electrophilic Mediated by SO<sub>2</sub>F<sub>2</sub> for Synthesis of Esters from Amides [J]. *Org. Lett.*, 2019, **21**, 8657–8661.
- [5] R. S. L. Chapman, M. Francis, R. Lawrence, J. D. Tibbetts, S. D. Bull, Formyloxyacetoxypheylmethane and 1,1-diacylals as Versatile O-formylating and O-acylating Reagents for Alcohols [J]. *Tetrahedron*, 2018, **74**, 6442–6452.
- [6] J.-H. Liu, Photoacid Generators, Photoresists Containing the Same, and Method of Undergoing a Photoacid-Catalyzed Reaction in a Resin Syste. US20000621632. 2002-8-13.
- [7] H. W. Lee, A. S. C. Chan, F. Y. Kwong, Formate as a CO Surrogate for Cascade Processes: Rh-Catalyzed Cooperative Decarbonylation and Asymmetric Pauson–Khand-type Cyclization Reactions. *Chem. Commun.*, 2007, 2633–2635.
- [8] S. Kumar, A. Kumar, R. K. Gupta, D. Kumar, One-Pot Synthesis of α-Formyloxy Ketones from Enolizable Ketones. *Synth. Commun.*, 2008, **38**, 338–345.
- [9] J.-Q. Wang, L.-N. He, C.-X, Polyethylene Glycol Radical-Initiated Oxidation of Benzylic Alcohols in Compressed Carbon Dioxide. *Green Chem.*, 2009, **11**, 1013–1017.
- [10] A. Richard, A. J. Shellhammer, Formate Esters by Cannizzaro-Tishchenko Reaction of Grignard and Sodium Alkoxides with Formaldehyde. *Org. Prep. Proced. Int.*, 1987, **19**, 161–166.

- [11] X.-B. Yan, C.-L. Li, W.-J. Jin, Reductive Coupling of Benzyl Oxalates with Highly Functionalized Alkyl Bromides by Nickel Catalysis. *Chem. Sci.*, 2018, **9**, 4529–4534.
- [12] Q.-W. Gu, J. Fang, Z.-C. Xu, CO<sub>2</sub> Promoted Synthesis of Unsymmetrical Organic Carbonate Using Switchable Agents Based on DBU and Alcohols. *New J. Chem.*, 2018, **42**, 13054–13064.
- [13] C.-M. Yu, B.-C. Zhou, W.-K. Su, Chemoselective Synthesis of Asymmetrical Carbonate from Alcohol and Dimethyl Carbonate Catalyzed by Ytterbium(III) Triflate. *Synth. Commun.*, 2007, **37**, 645–651.
- [14] M. Ohkoshi, J. Michinishi, S. Hara, H. Senboku, Electrochemical Carboxylation of Benzylic Carbonates: Alternative Method for Efficient Synthesis of Arylacetic Acids. *Tetrahedron*, 2010, **66**, 7732–7737.
- [15] T. Mukai, K. Hirano, T. Satoh, Palladium-Catalyzed Direct Benzylolation of Azoles with Benzyl Carbonates. *Org. Lett.*, 2010, **12**, 1360–1363.
- [16] T. Song, S. Arseniyadis, J. Cossy, Asymmetric Synthesis of  $\alpha$ -Quaternary  $\gamma$ -Lactams through Palladium-Catalyzed Asymmetric Allylic Alkylation. *Org. Lett.*, 2019, **21**, 603–607.
- [17] Y. Zhu, V. H. Rawal, V. H. Palladium-Catalyzed C3-Benzylolation of Indoles. *J. Am. Chem. Soc.*, 2012, **134**, 111–114.

## J. NMR spectra of products

### $^1\text{H}$ NMR (400 MHz, $\text{CDCl}_3$ ) spectrum of 2a

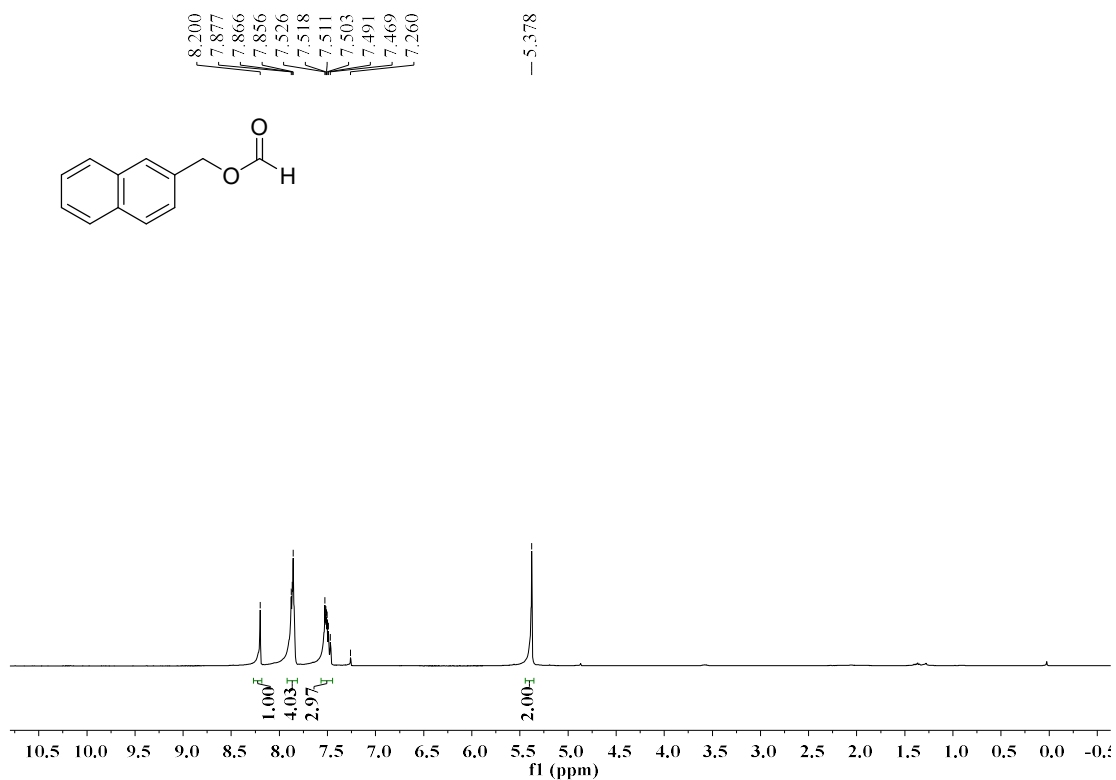

### $^{13}\text{C}$ NMR (100 MHz, $\text{CDCl}_3$ ) spectrum of 2a

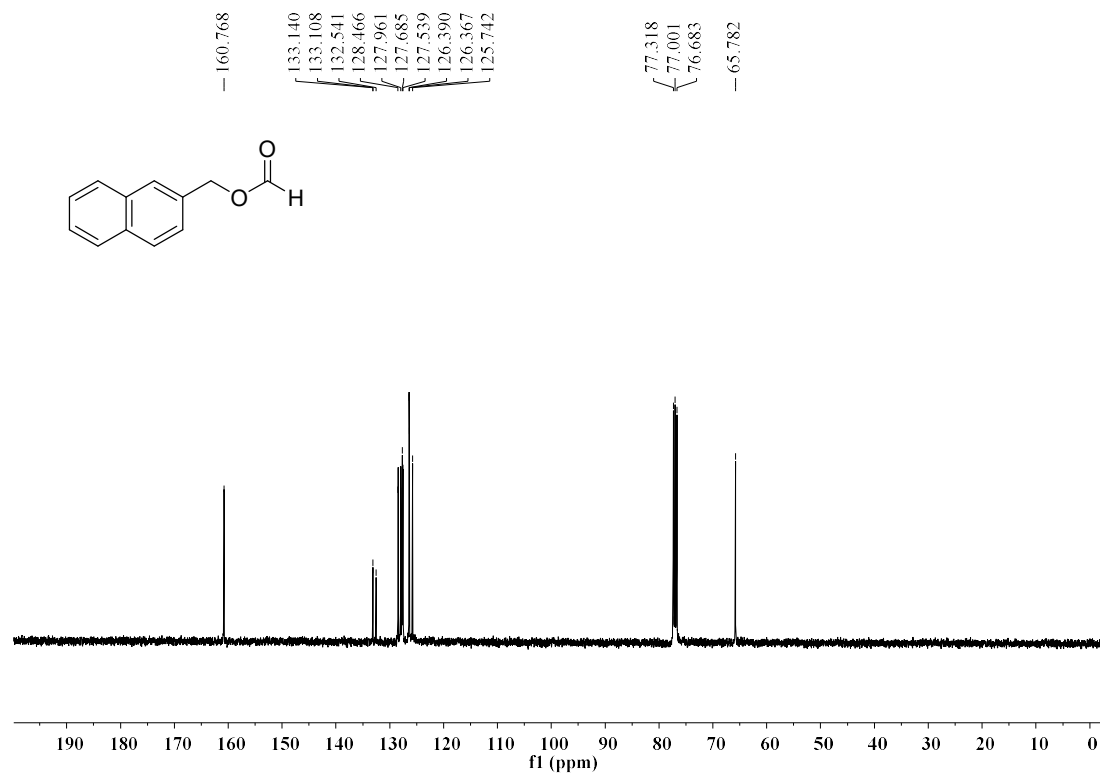

### <sup>1</sup>H NMR (400 MHz, CDCl<sub>3</sub>) spectrum of 2b

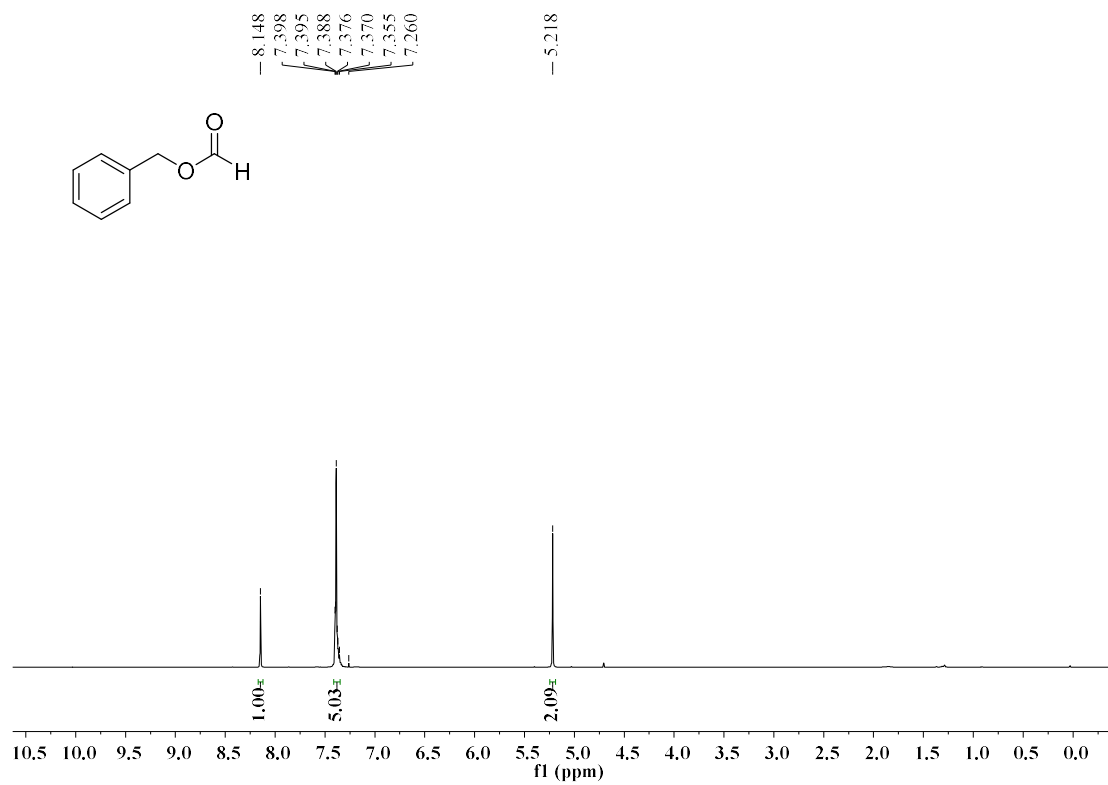

### <sup>13</sup>C NMR (100 MHz, CDCl<sub>3</sub>) spectrum of 2b

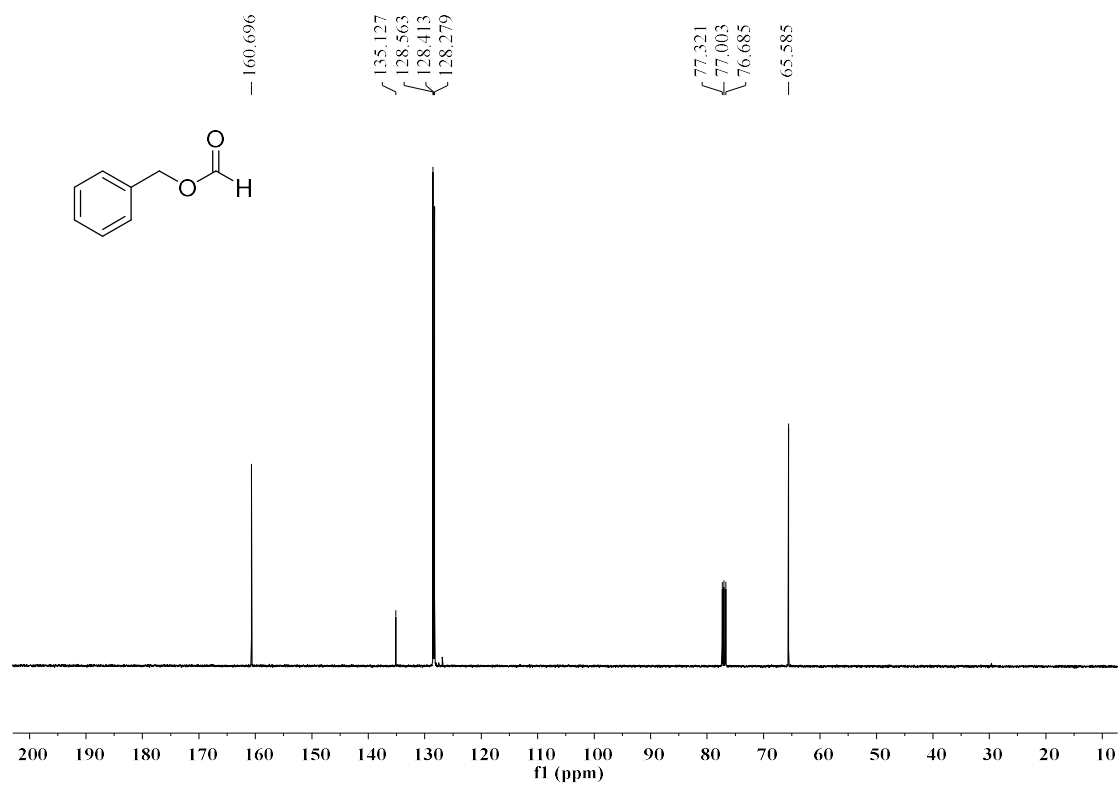

### <sup>1</sup>H NMR (400 MHz, CDCl<sub>3</sub>) spectrum of 2c

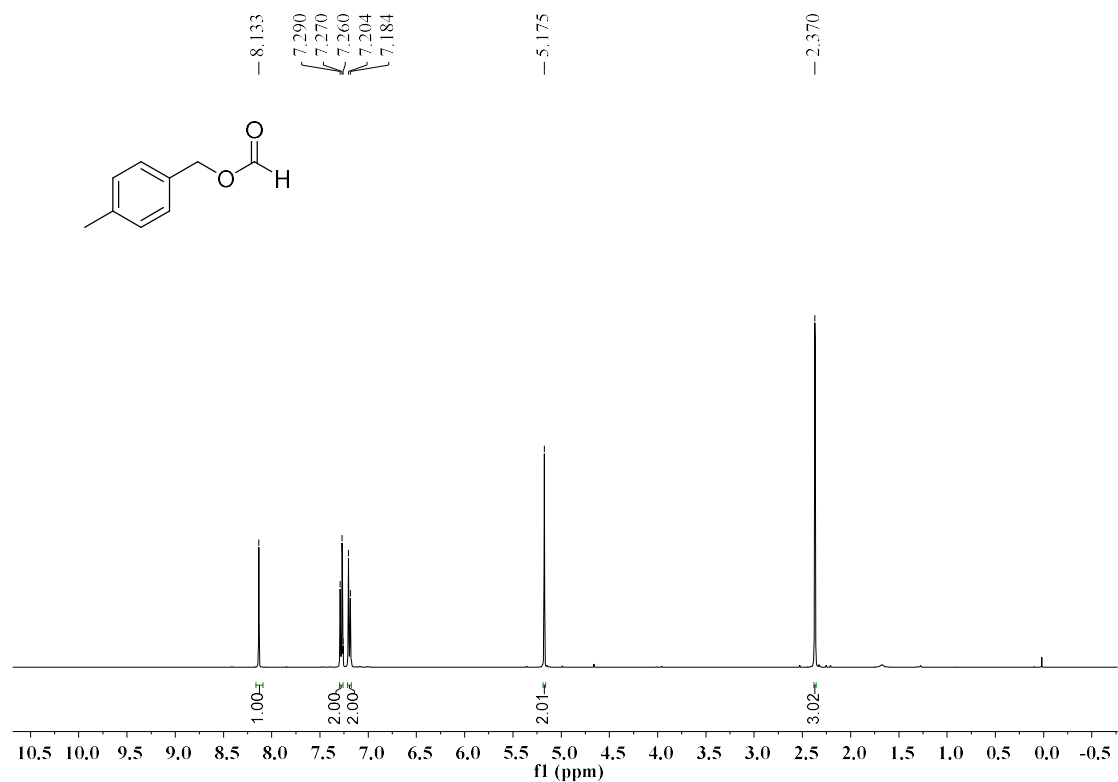

### <sup>13</sup>C NMR (100 MHz, CDCl<sub>3</sub>) spectrum of 2c

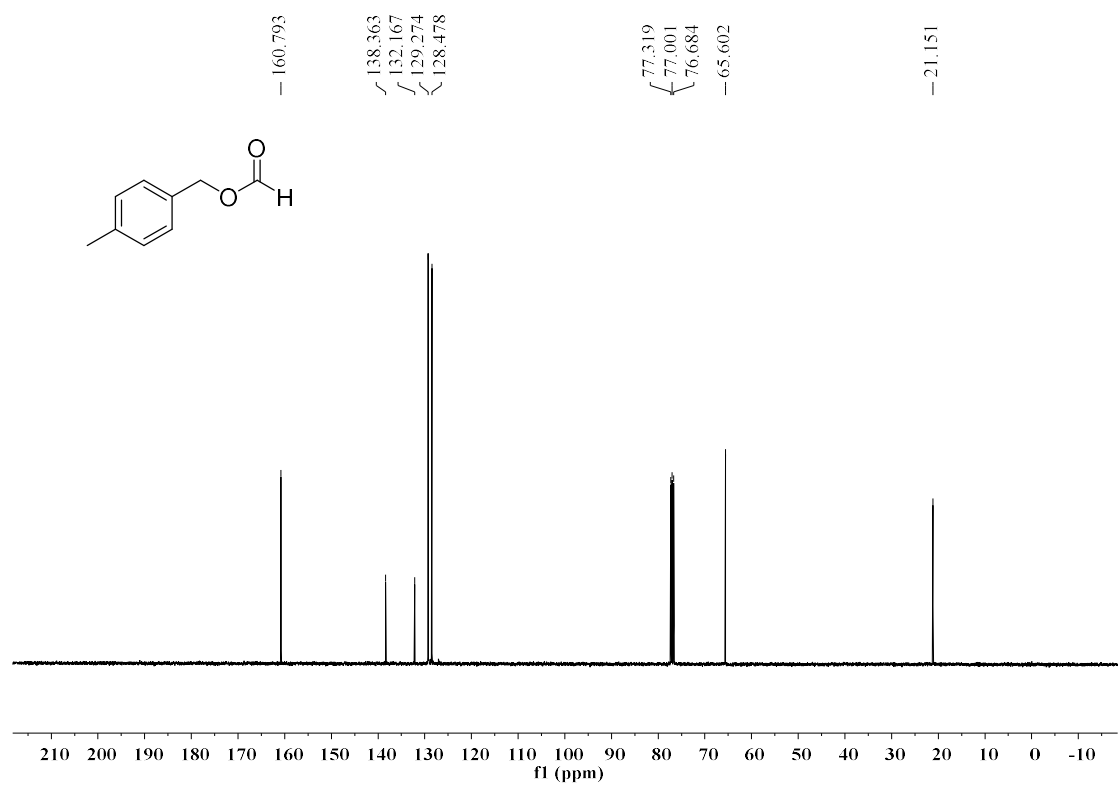

### <sup>1</sup>H NMR (400 MHz, CDCl<sub>3</sub>) spectrum of 2d

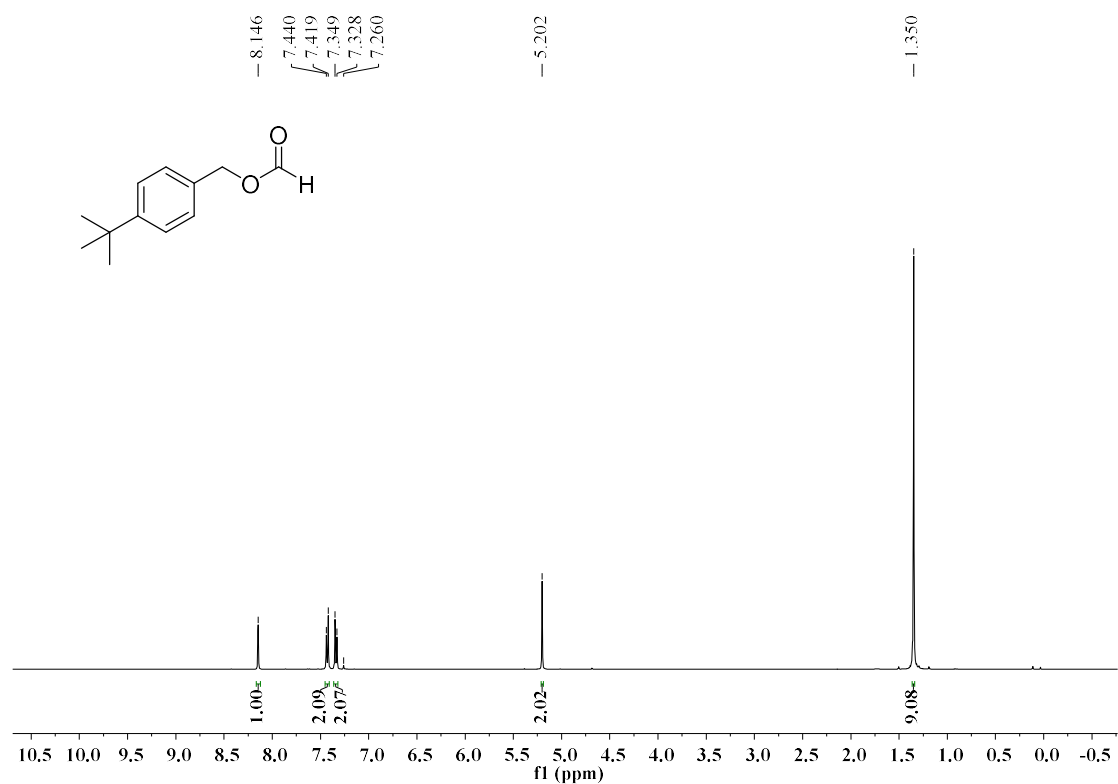

### <sup>13</sup>C NMR (100 MHz, CDCl<sub>3</sub>) spectrum of 2d

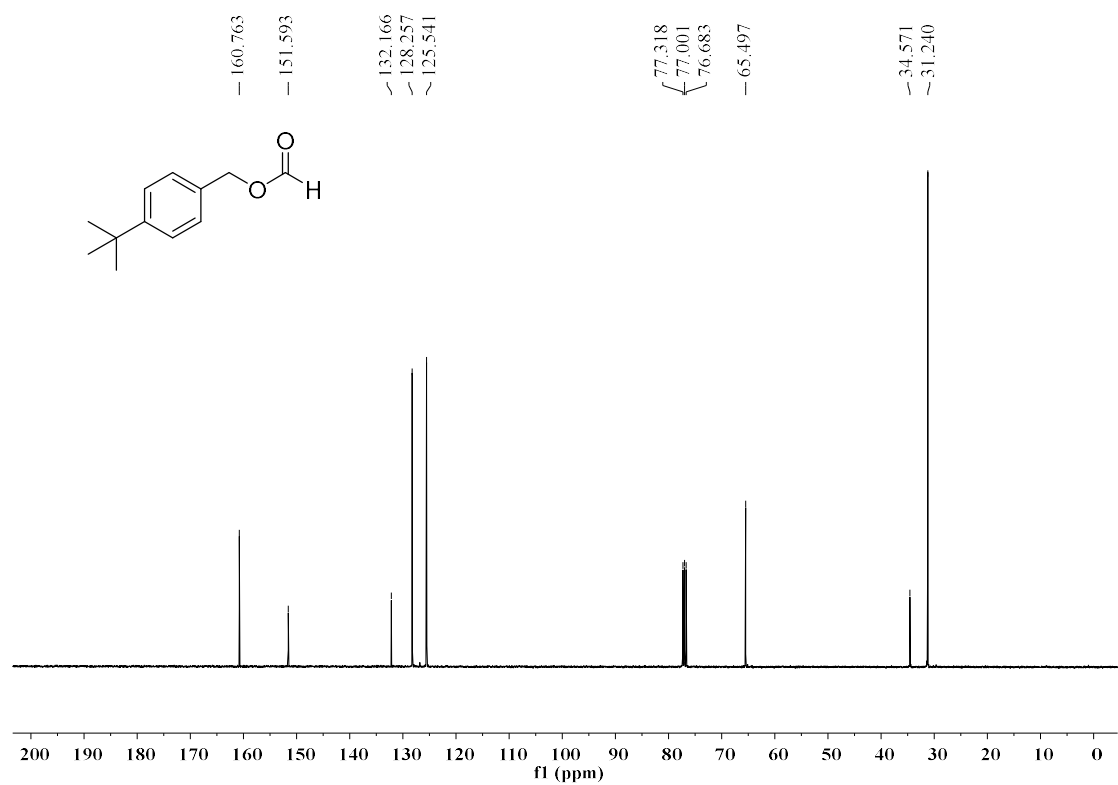

### <sup>1</sup>H NMR (400 MHz, CDCl<sub>3</sub>) spectrum of 2e

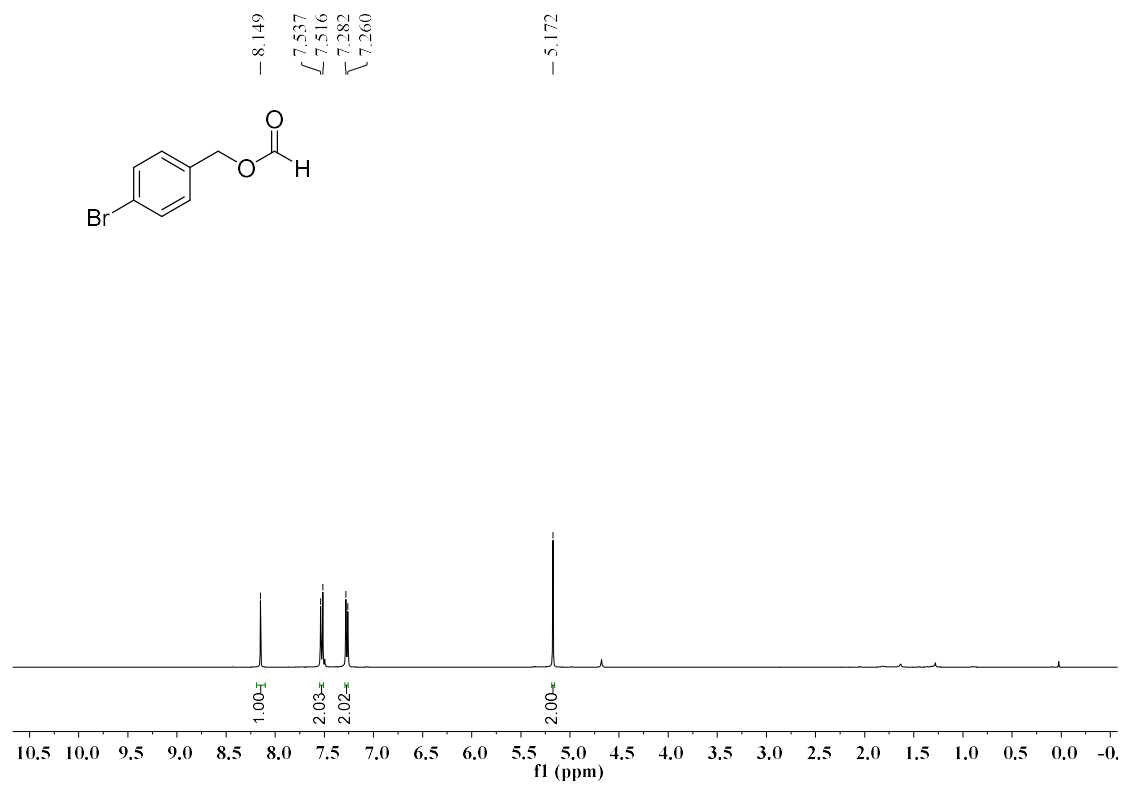

### <sup>13</sup>C NMR (100 MHz, CDCl<sub>3</sub>) spectrum of 2e

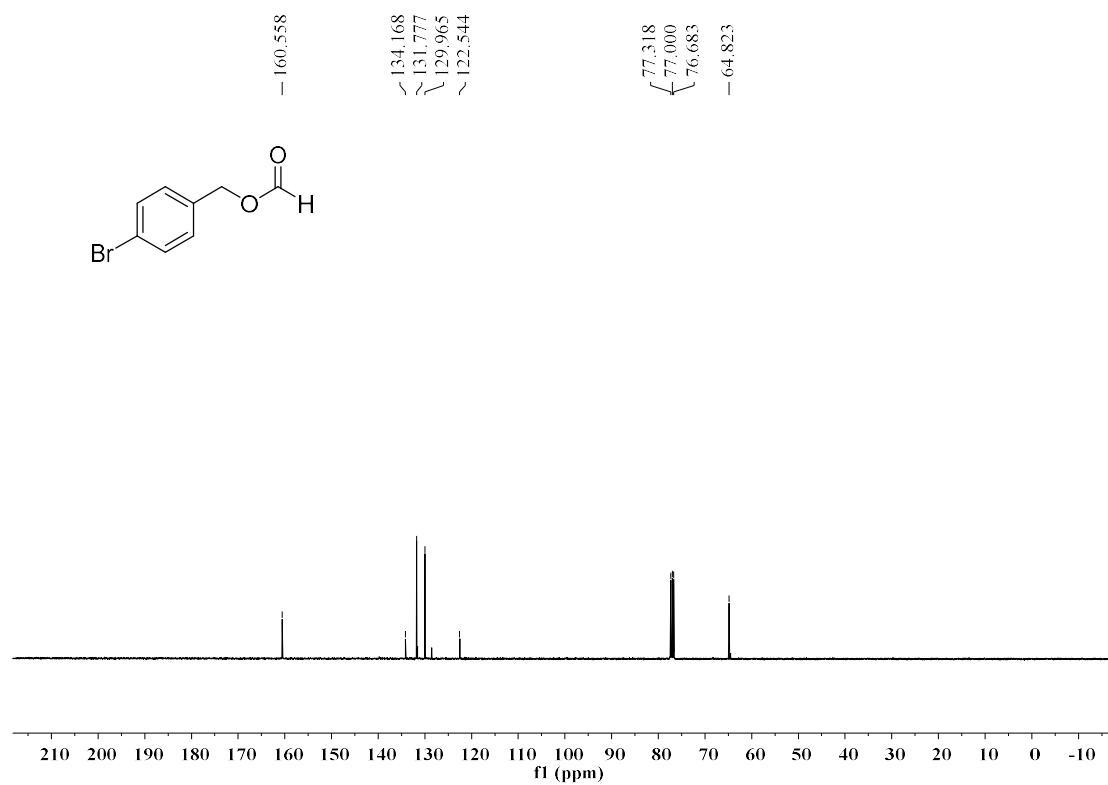

### <sup>1</sup>H NMR (400 MHz, CDCl<sub>3</sub>) spectrum of 2f

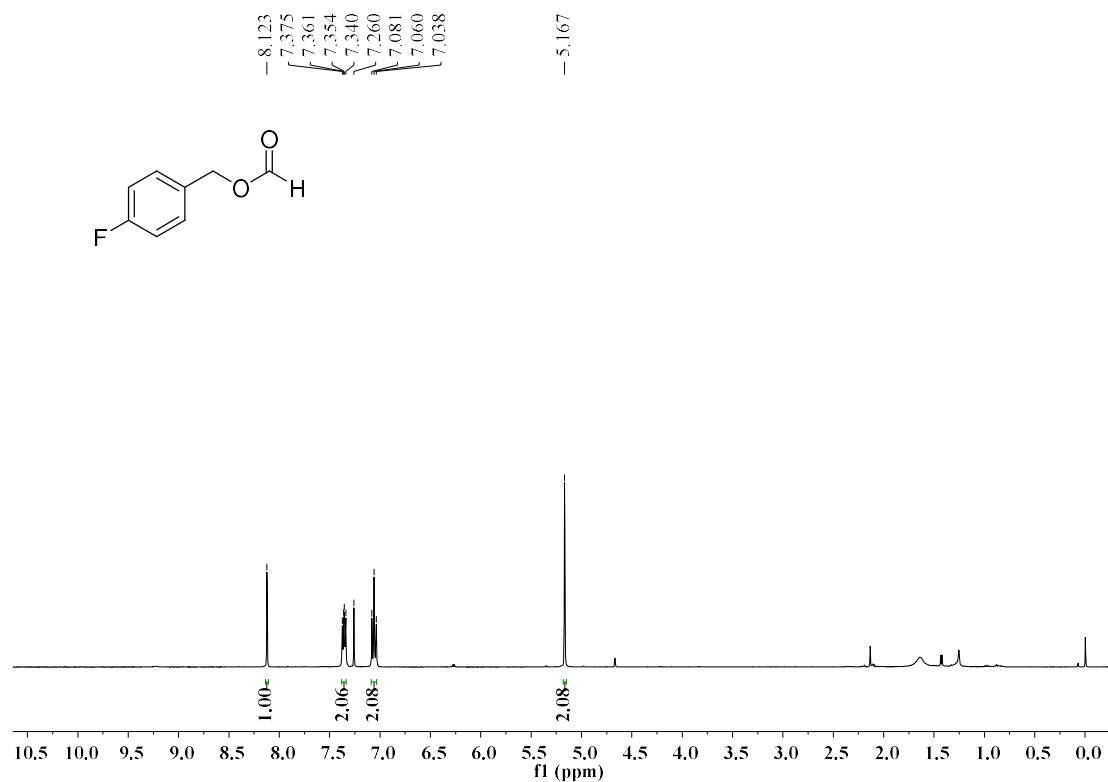

### <sup>13</sup>C NMR (100 MHz, CDCl<sub>3</sub>) spectrum of 2f

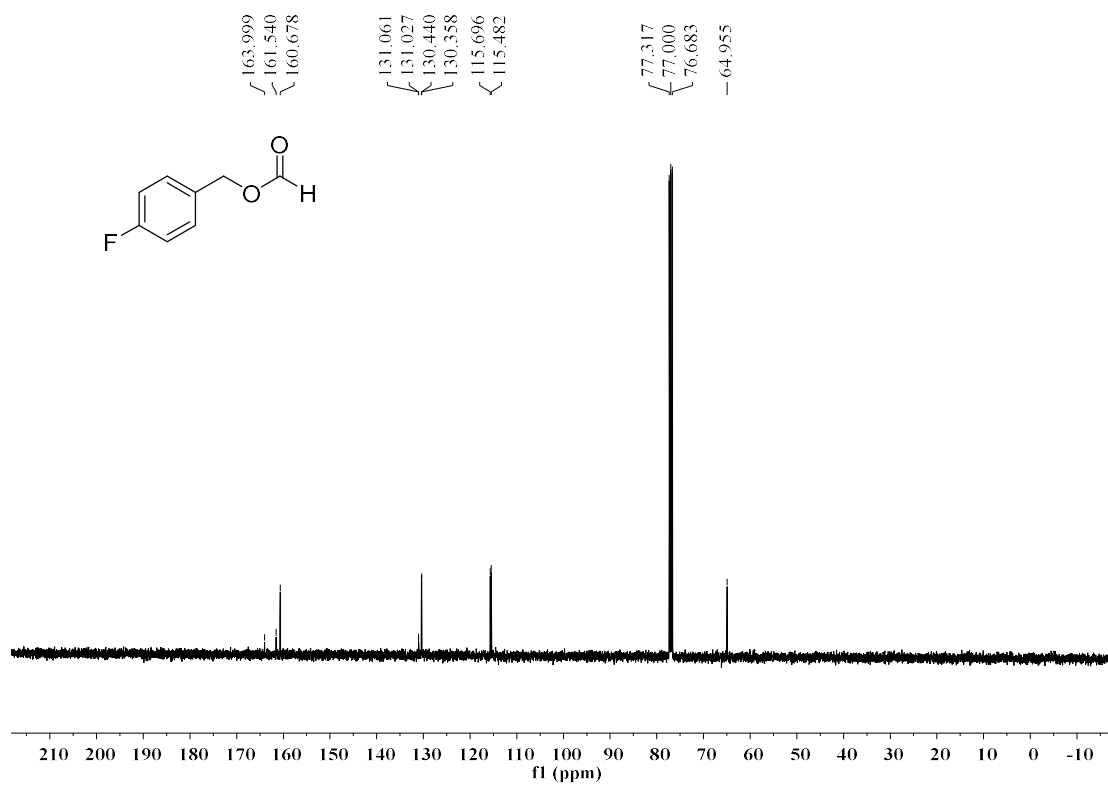

### <sup>1</sup>H NMR (400 MHz, CDCl<sub>3</sub>) spectrum of 2g

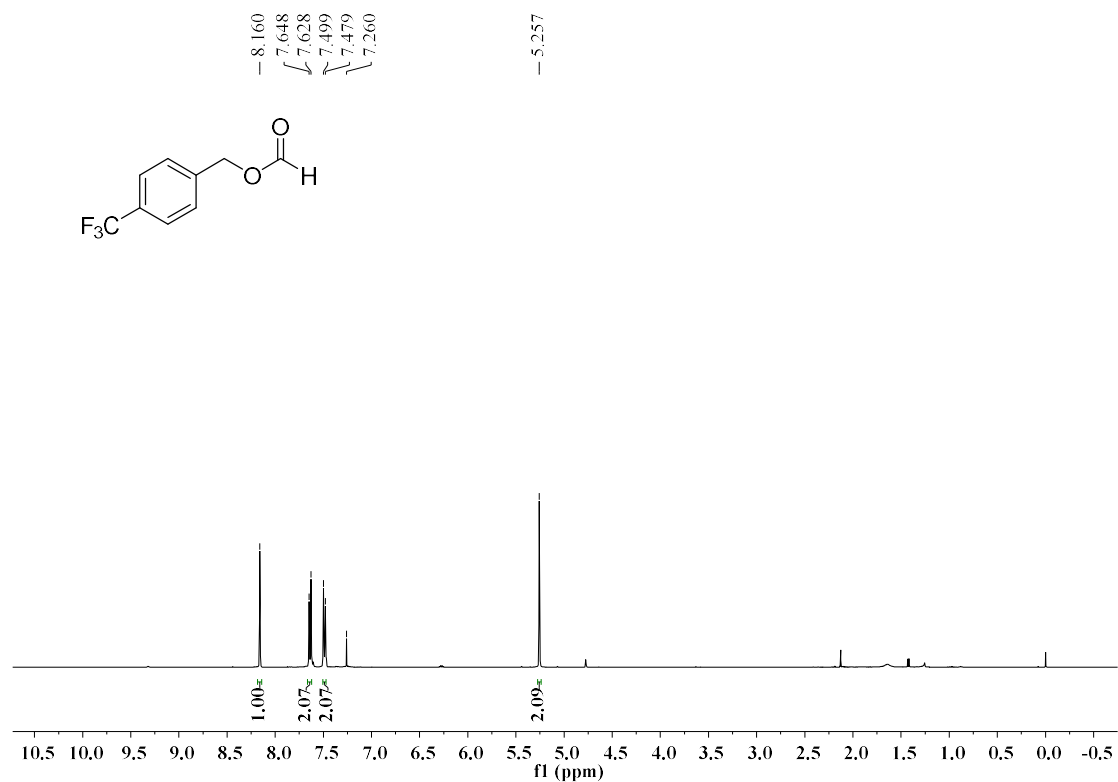

### <sup>13</sup>C NMR (100 MHz, CDCl<sub>3</sub>) spectrum of 2g

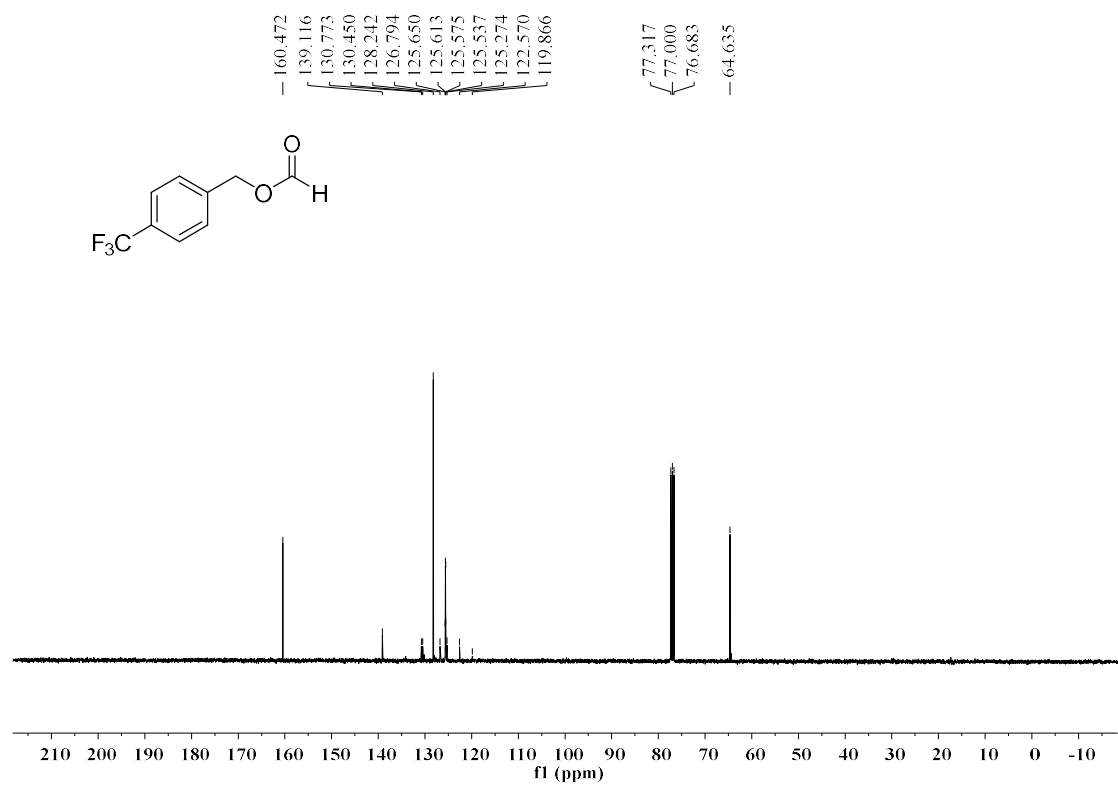

### <sup>1</sup>H NMR (400 MHz, CDCl<sub>3</sub>) spectrum of 2h

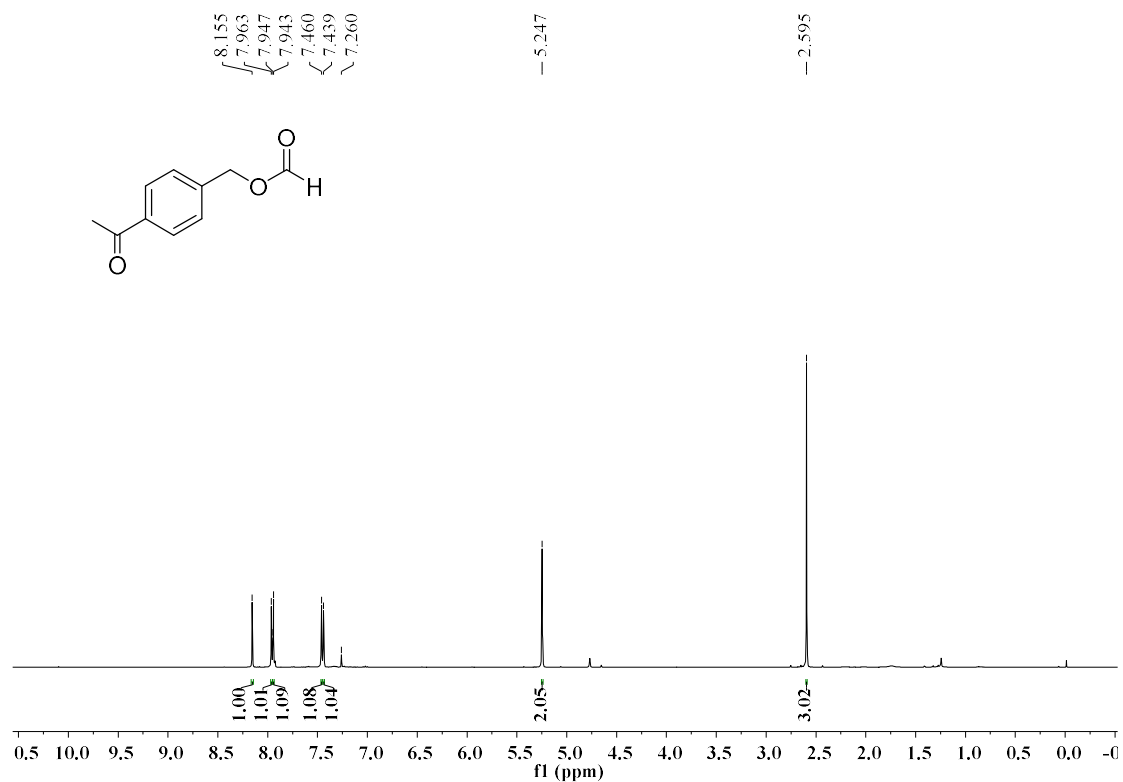

### <sup>13</sup>C NMR (100 MHz, CDCl<sub>3</sub>) spectrum of 2h

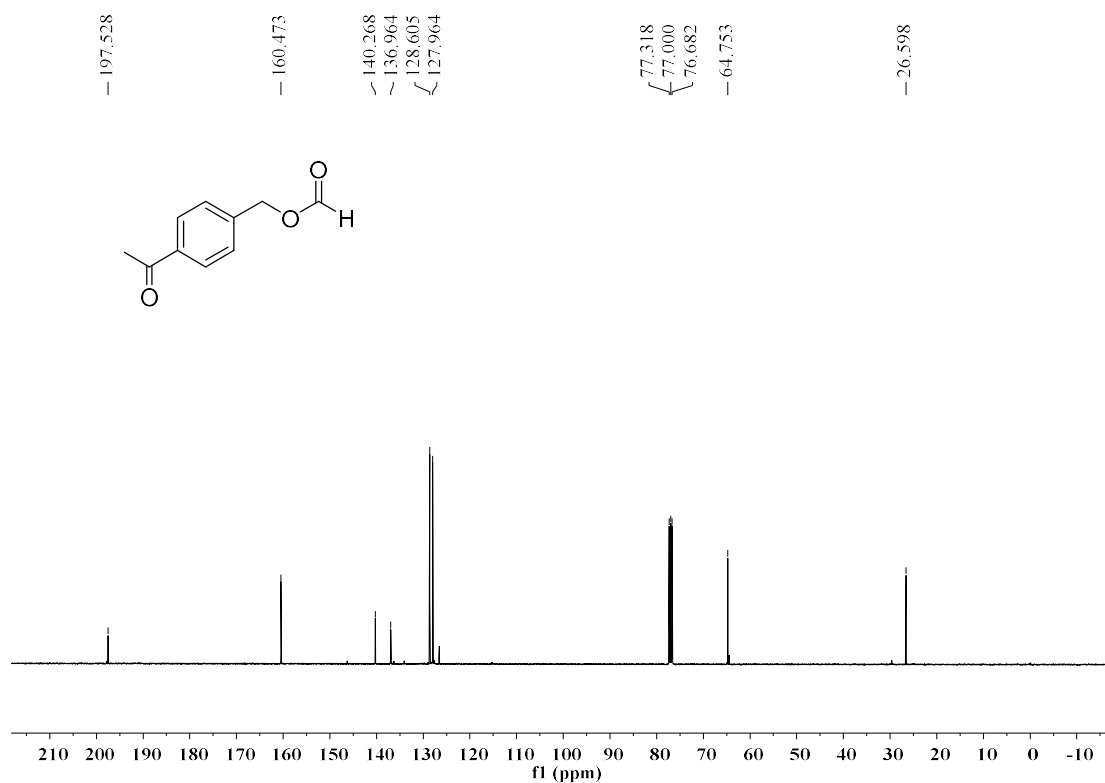

### <sup>1</sup>H NMR (400 MHz, CDCl<sub>3</sub>) spectrum of 2i

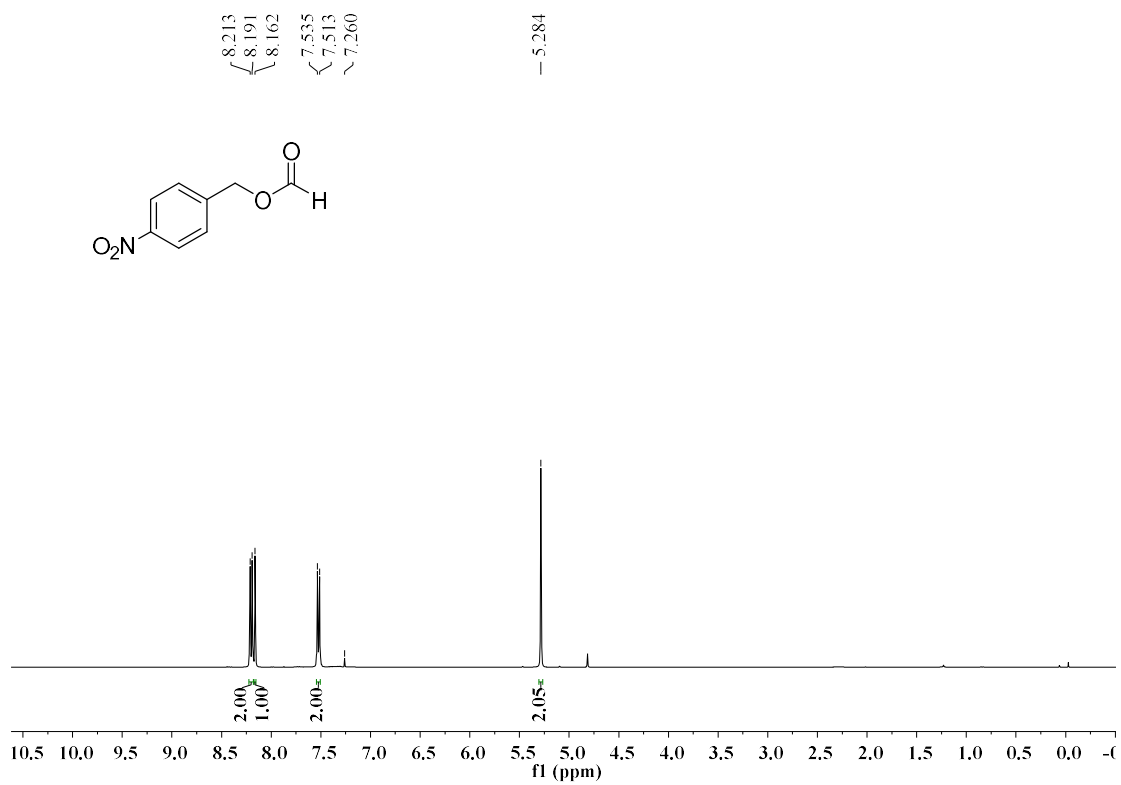

### <sup>13</sup>C NMR (100 MHz, CDCl<sub>3</sub>) spectrum of 2i

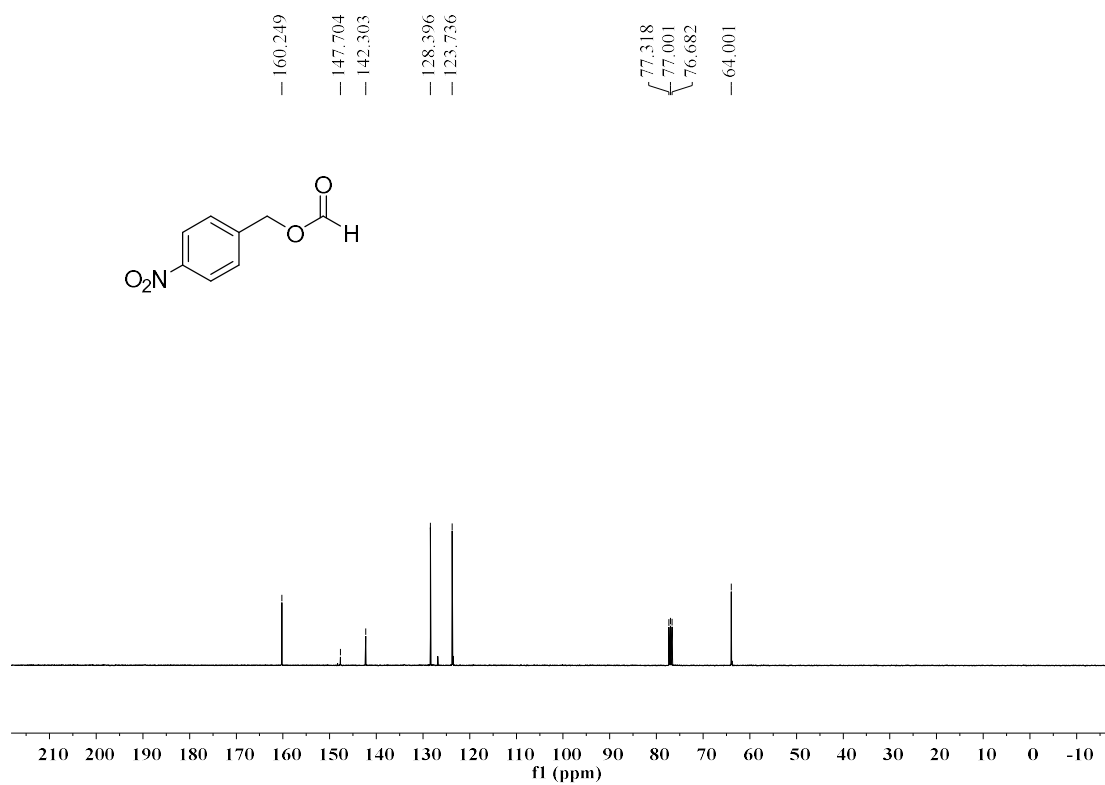

### <sup>1</sup>H NMR (400 MHz, CDCl<sub>3</sub>) spectrum of 2j

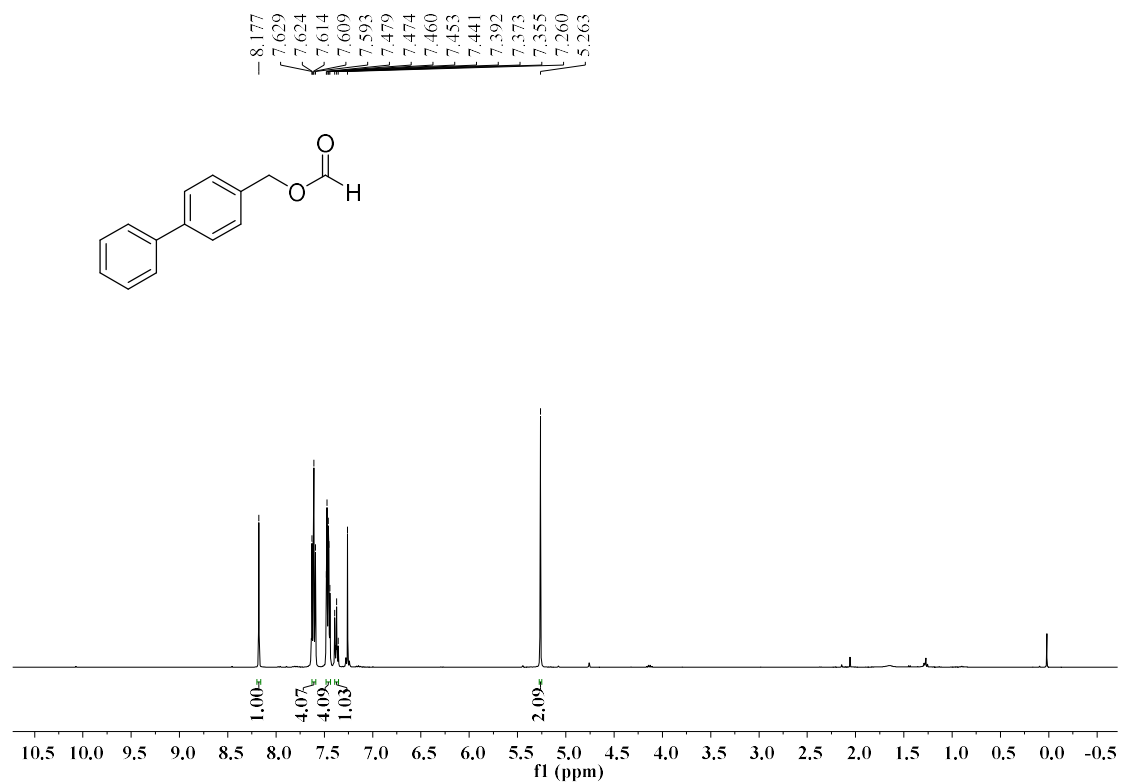

### <sup>13</sup>C NMR (100 MHz, CDCl<sub>3</sub>) spectrum of 2j

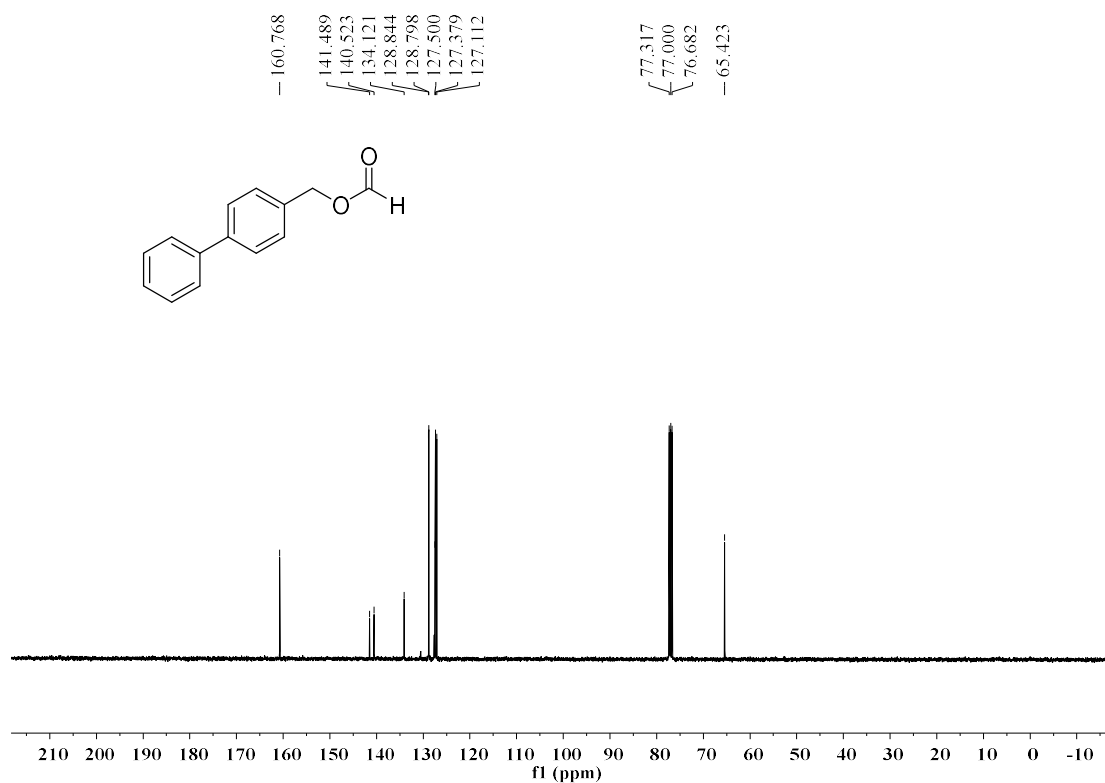

### <sup>1</sup>H NMR (400 MHz, CDCl<sub>3</sub>) spectrum of 2k

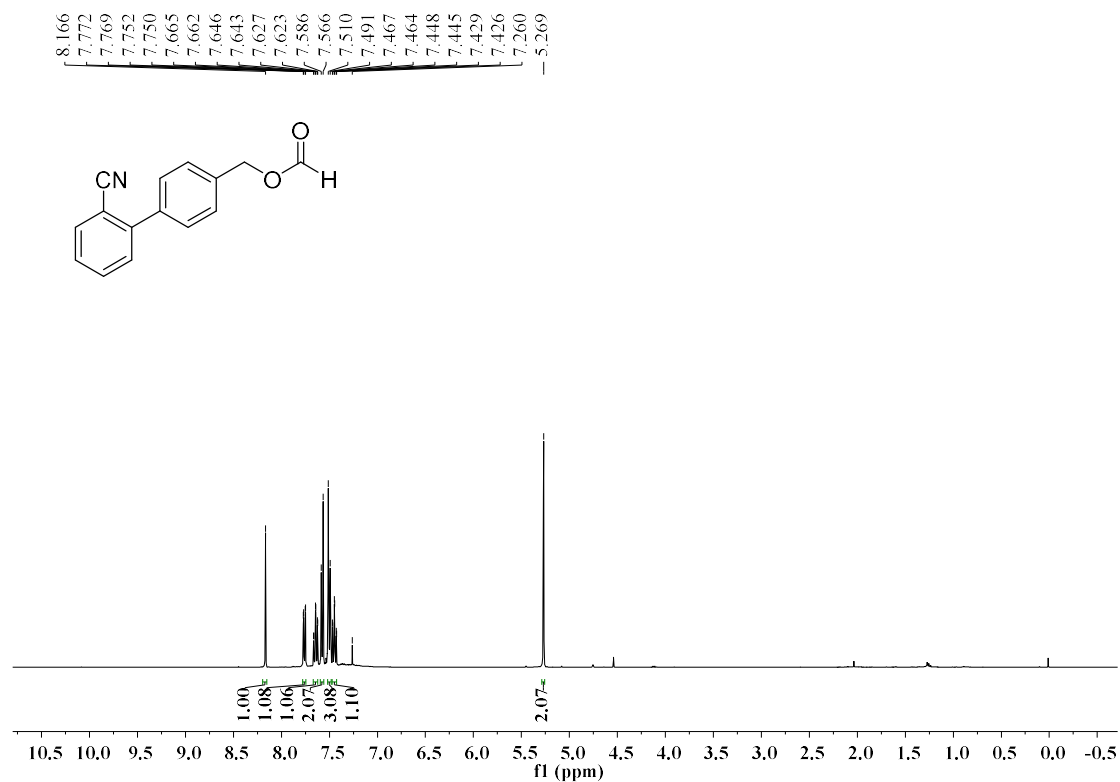

### <sup>13</sup>C NMR (100 MHz, CDCl<sub>3</sub>) spectrum of 2k

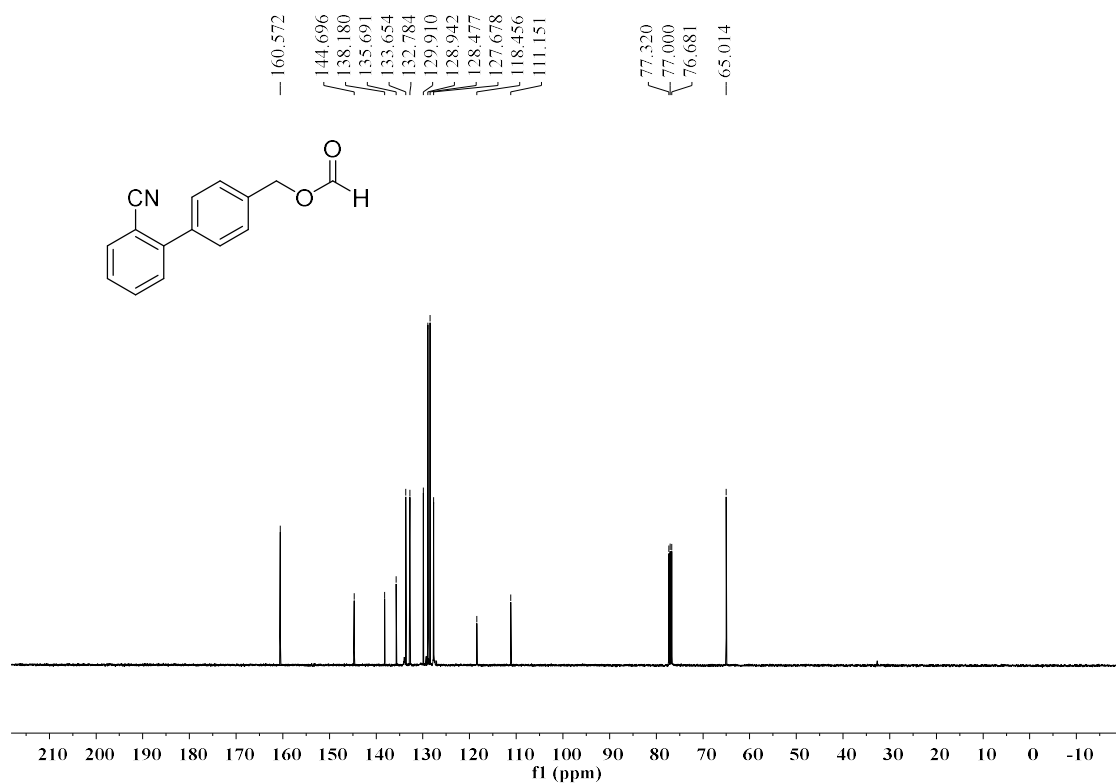

### <sup>1</sup>H NMR (400 MHz, CDCl<sub>3</sub>) spectrum of 21

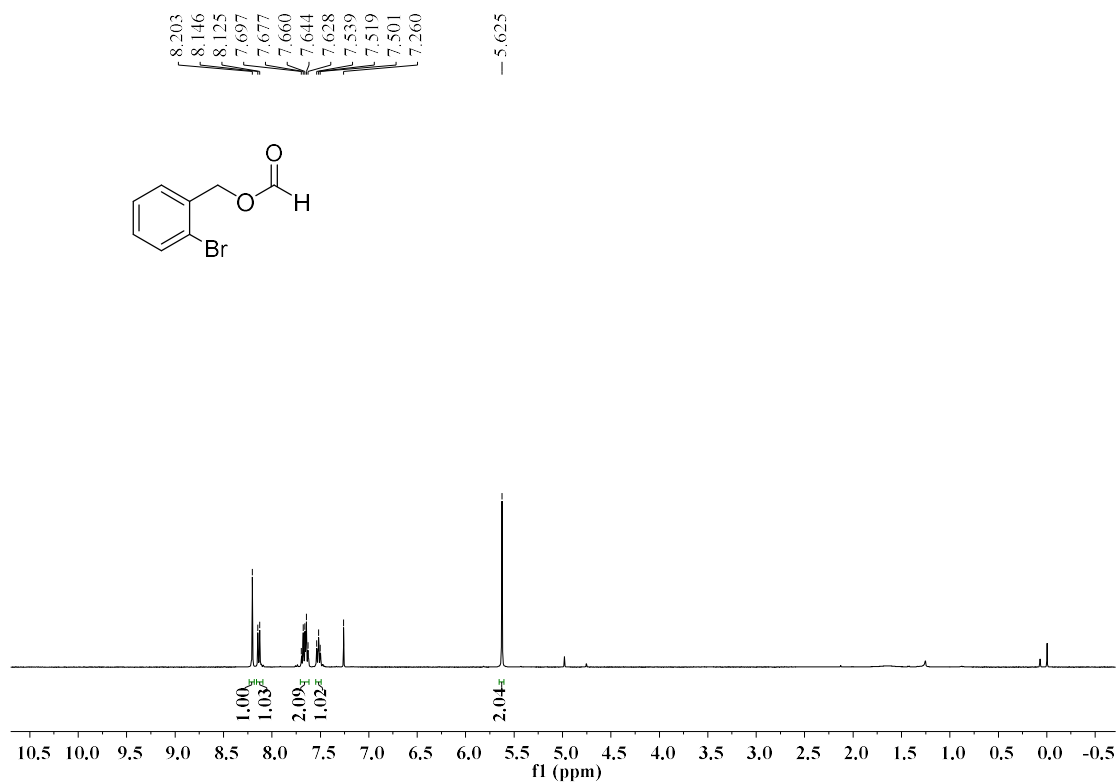

### <sup>13</sup>C NMR (100 MHz, CDCl<sub>3</sub>) spectrum of 21

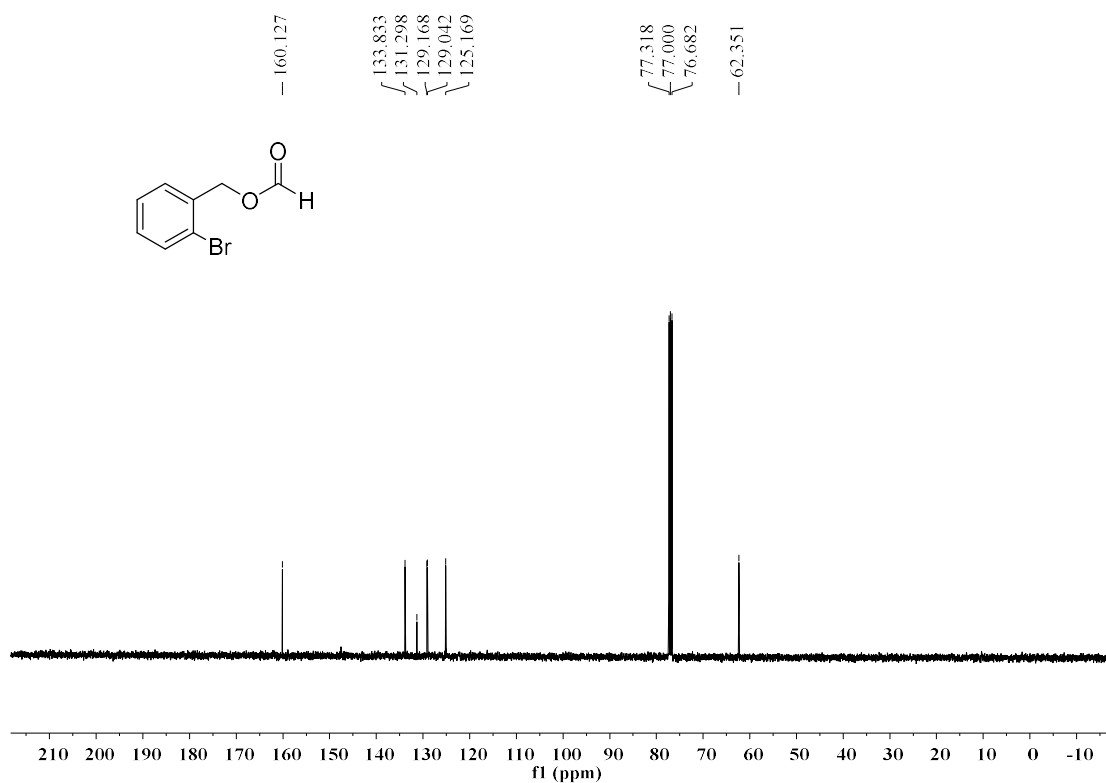

### <sup>1</sup>H NMR (400 MHz, CDCl<sub>3</sub>) spectrum of 2m

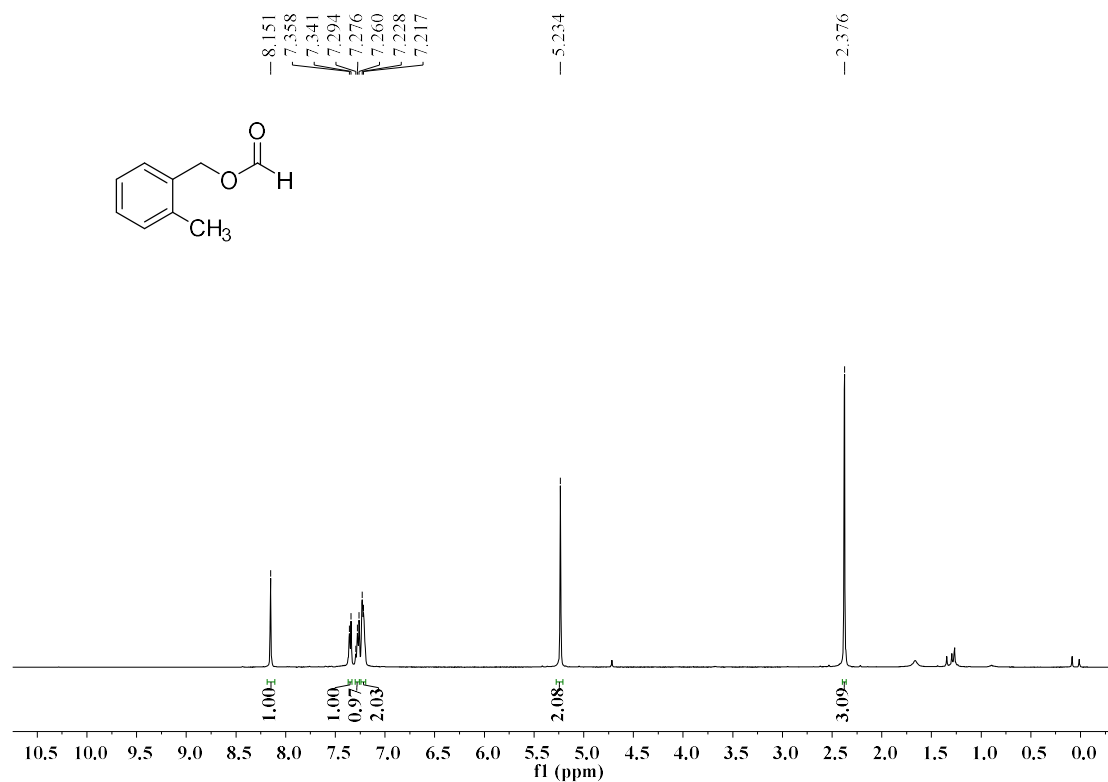

### <sup>13</sup>C NMR (100 MHz, CDCl<sub>3</sub>) spectrum of 2m

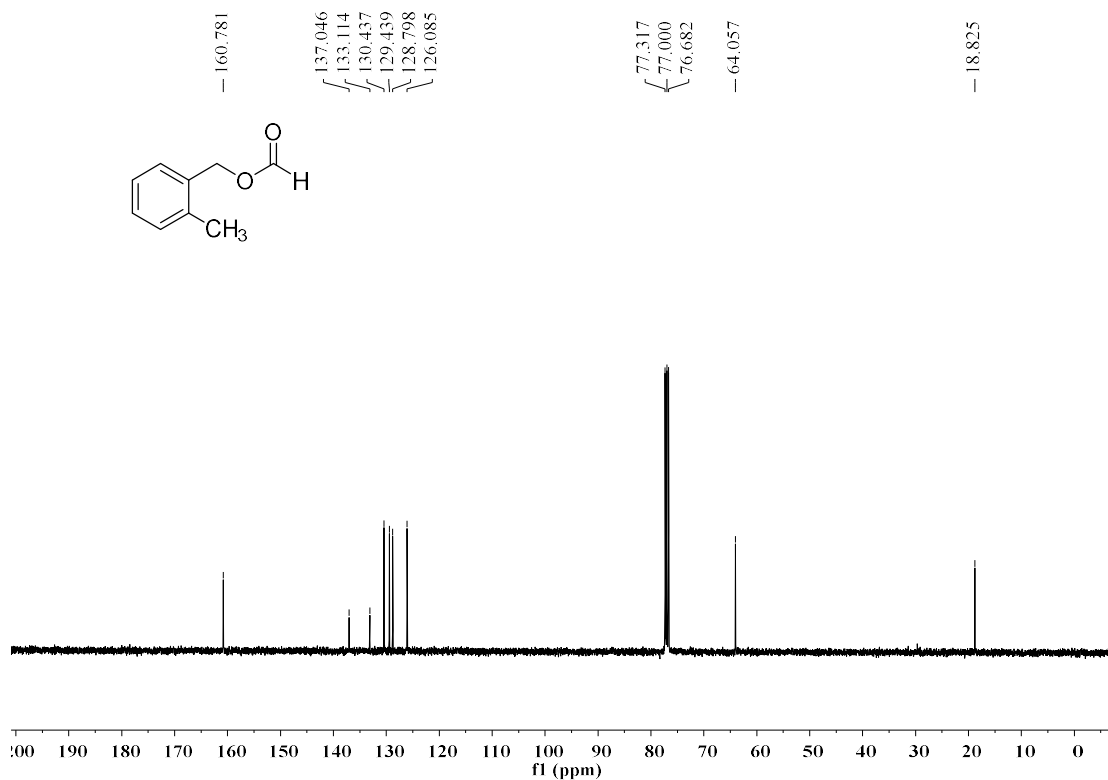

### <sup>1</sup>H NMR (400 MHz, CDCl<sub>3</sub>) spectrum of 2n

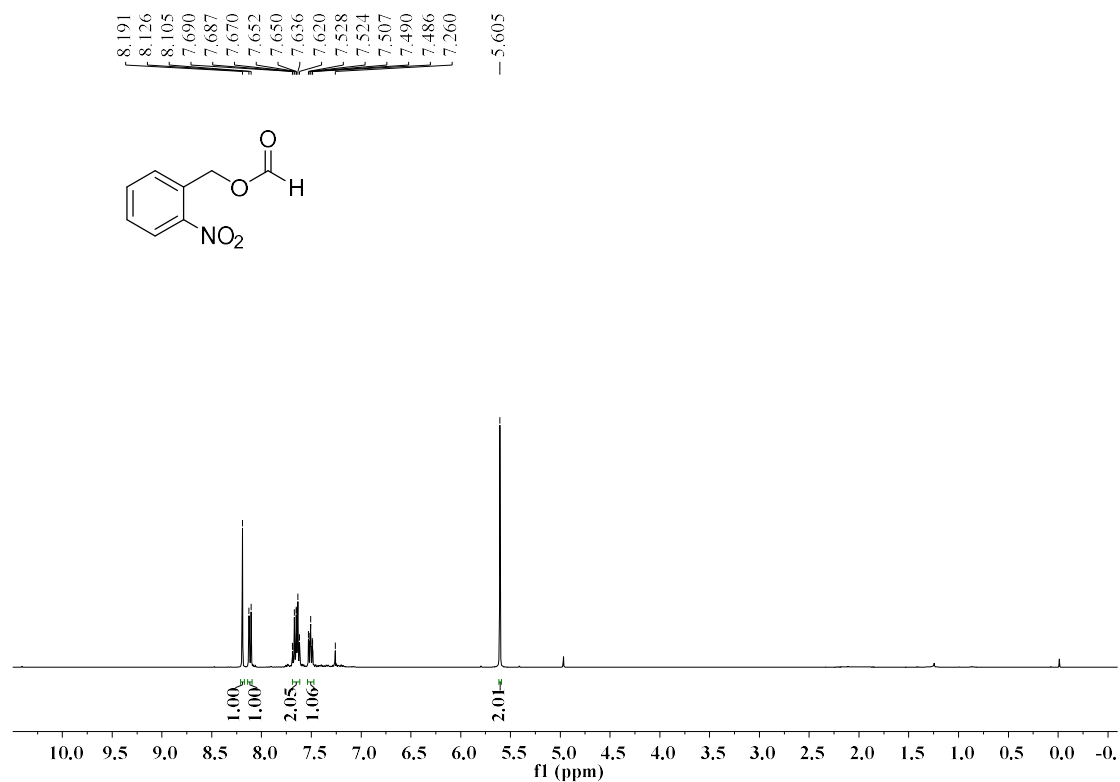

### <sup>13</sup>C NMR (100 MHz, CDCl<sub>3</sub>) spectrum of 2n

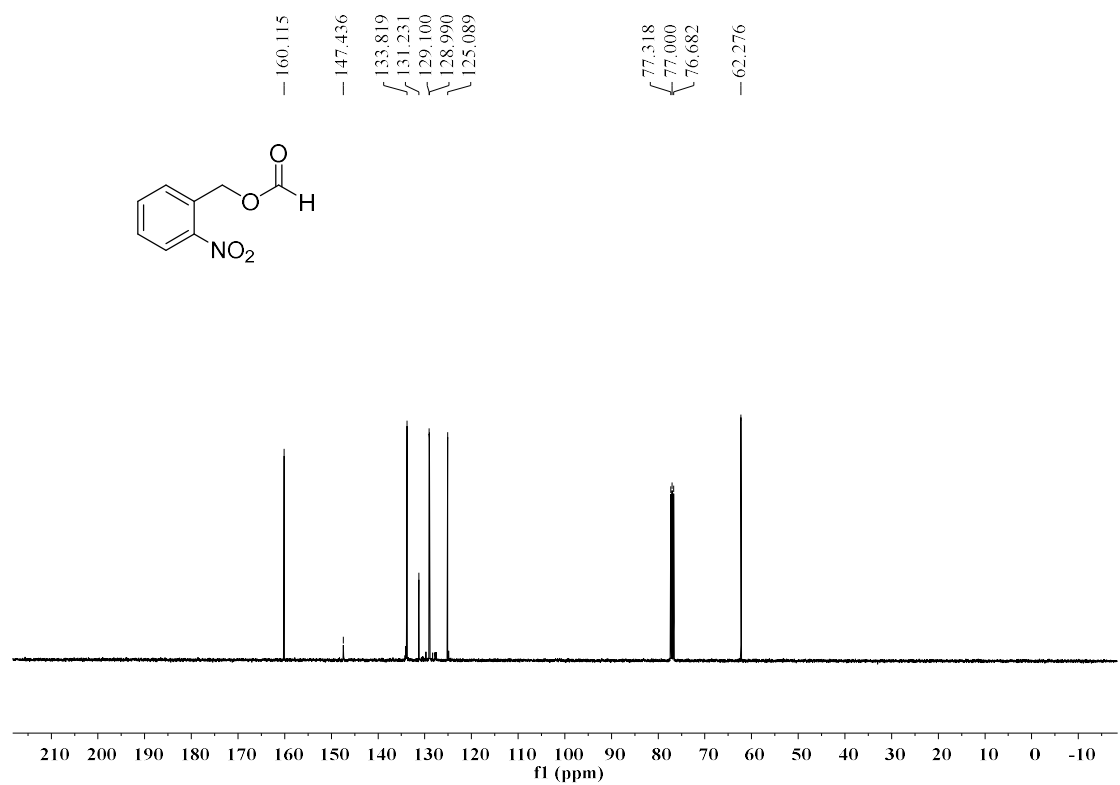

### <sup>1</sup>H NMR (400 MHz, CDCl<sub>3</sub>) spectrum of 2o

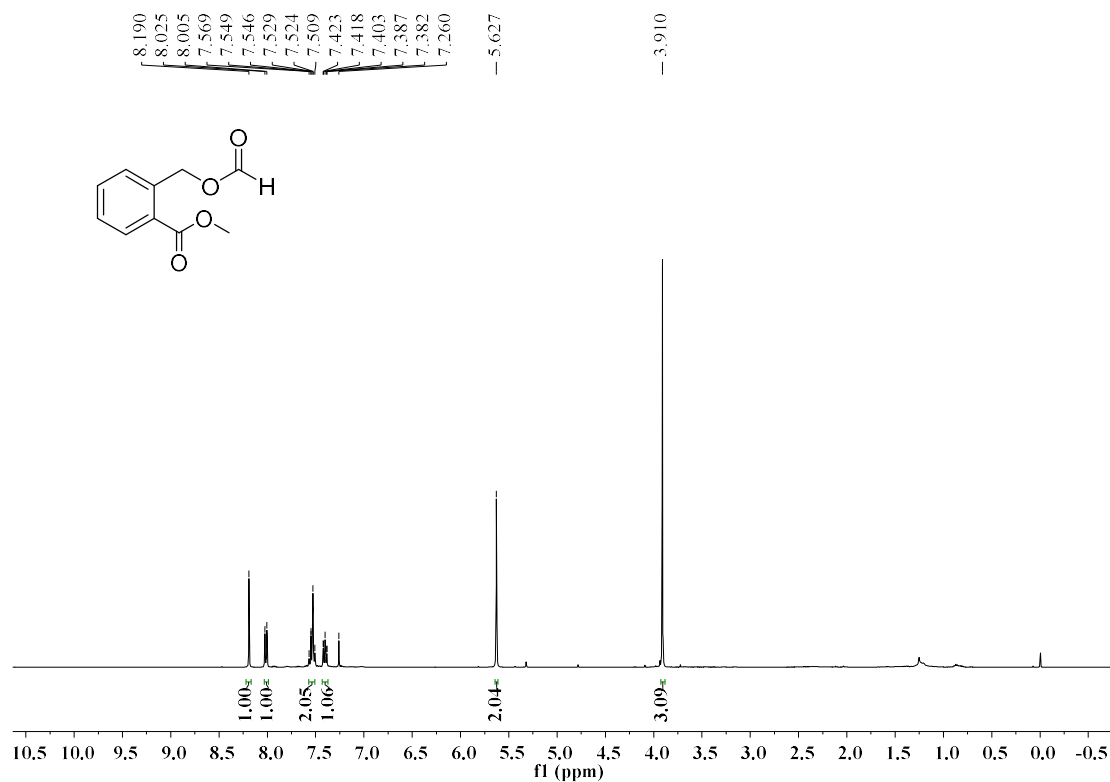

### <sup>13</sup>C NMR (100 MHz, CDCl<sub>3</sub>) spectrum of 2o

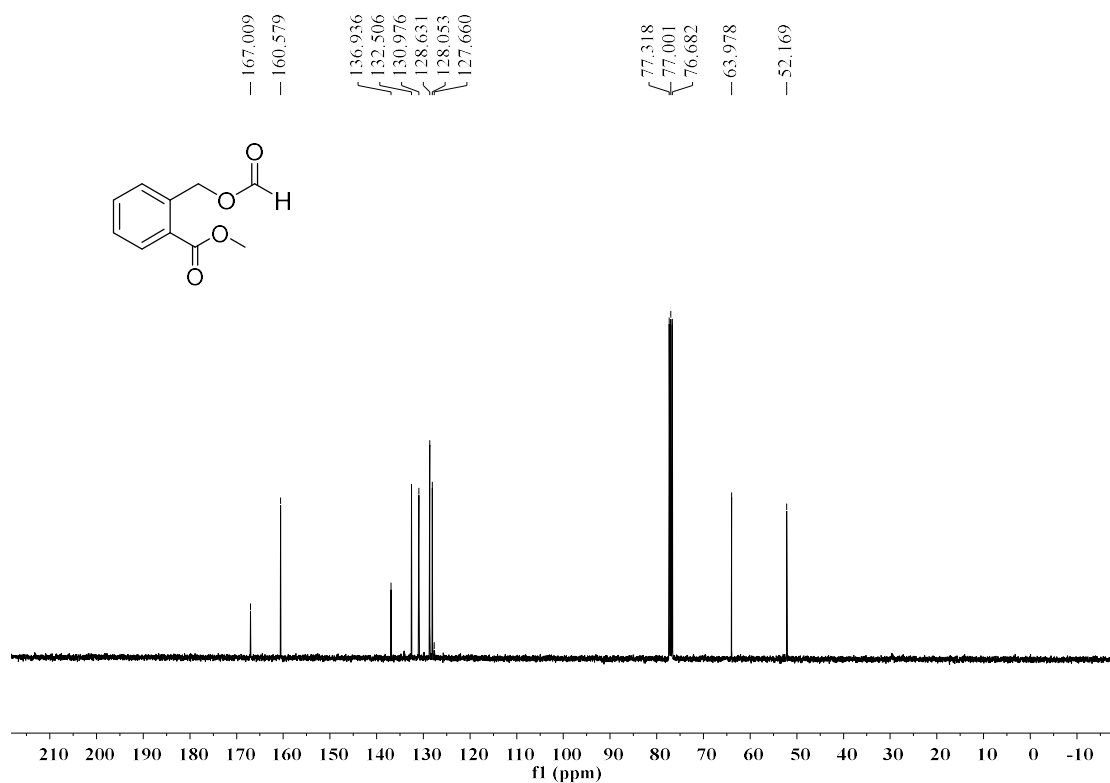

### <sup>1</sup>H NMR (400 MHz, CDCl<sub>3</sub>) spectrum of 2p

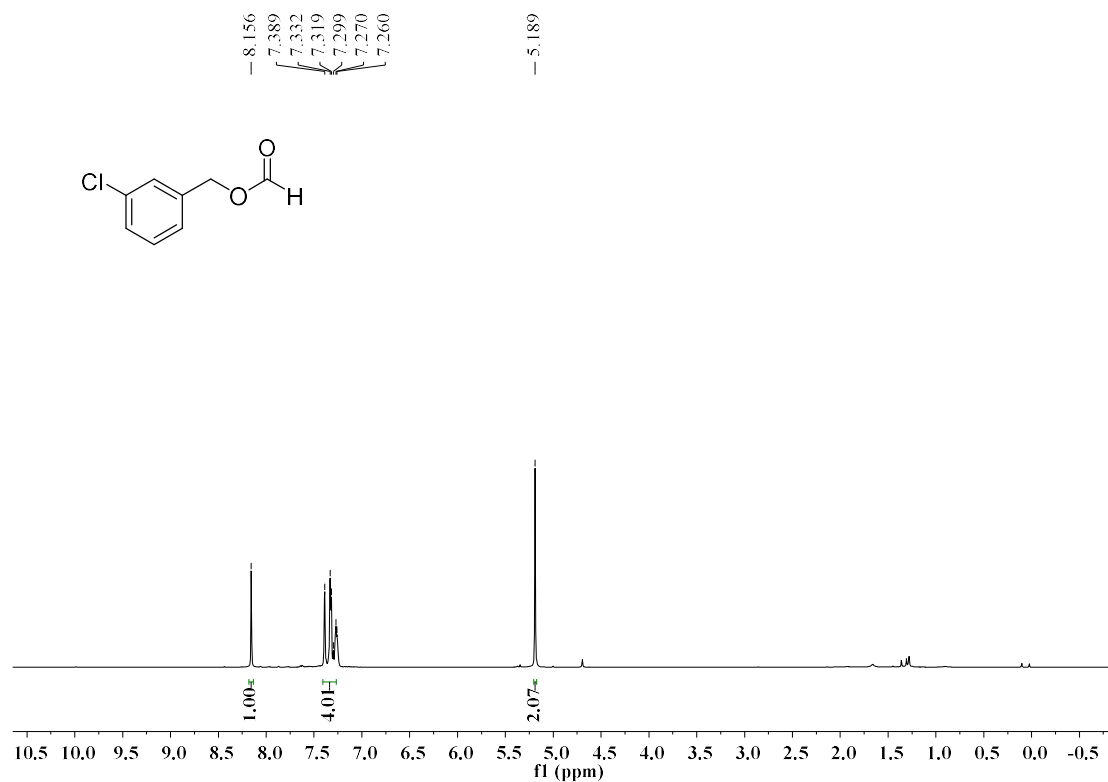

### <sup>13</sup>C NMR (100 MHz, CDCl<sub>3</sub>) spectrum of 2p

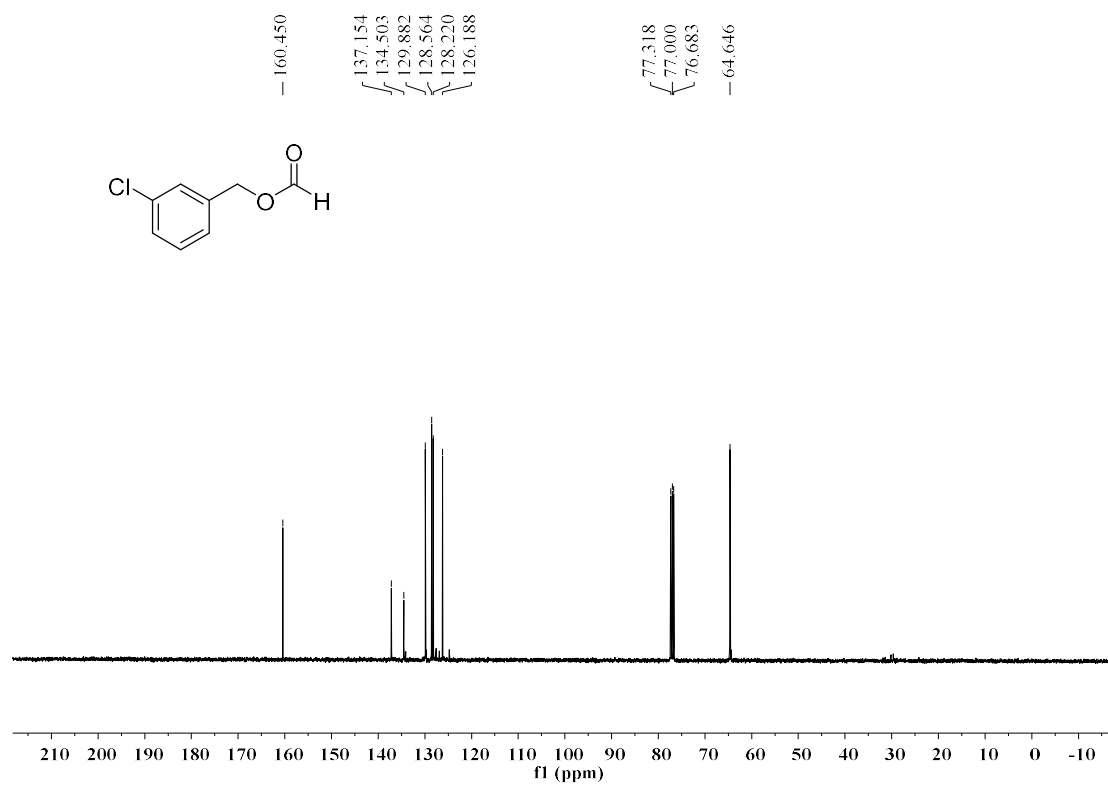

### <sup>1</sup>H NMR (400 MHz, CDCl<sub>3</sub>) spectrum of 2q

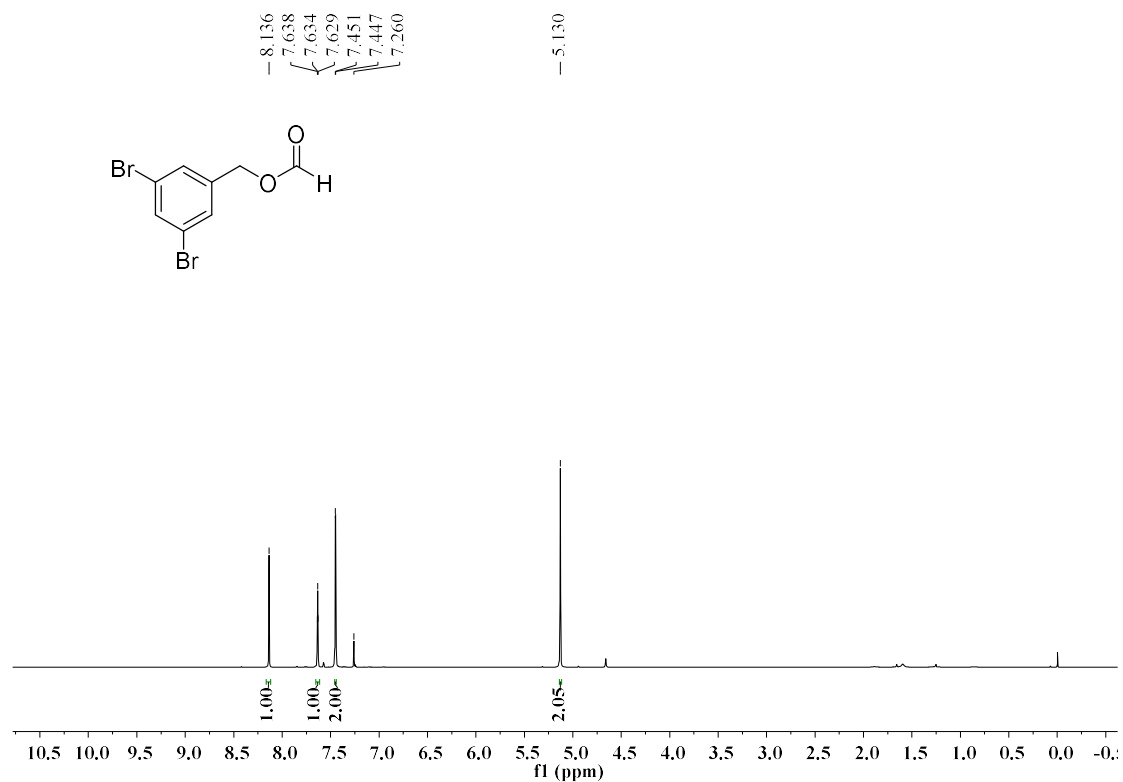

### <sup>13</sup>C NMR (100 MHz, CDCl<sub>3</sub>) spectrum of 2q

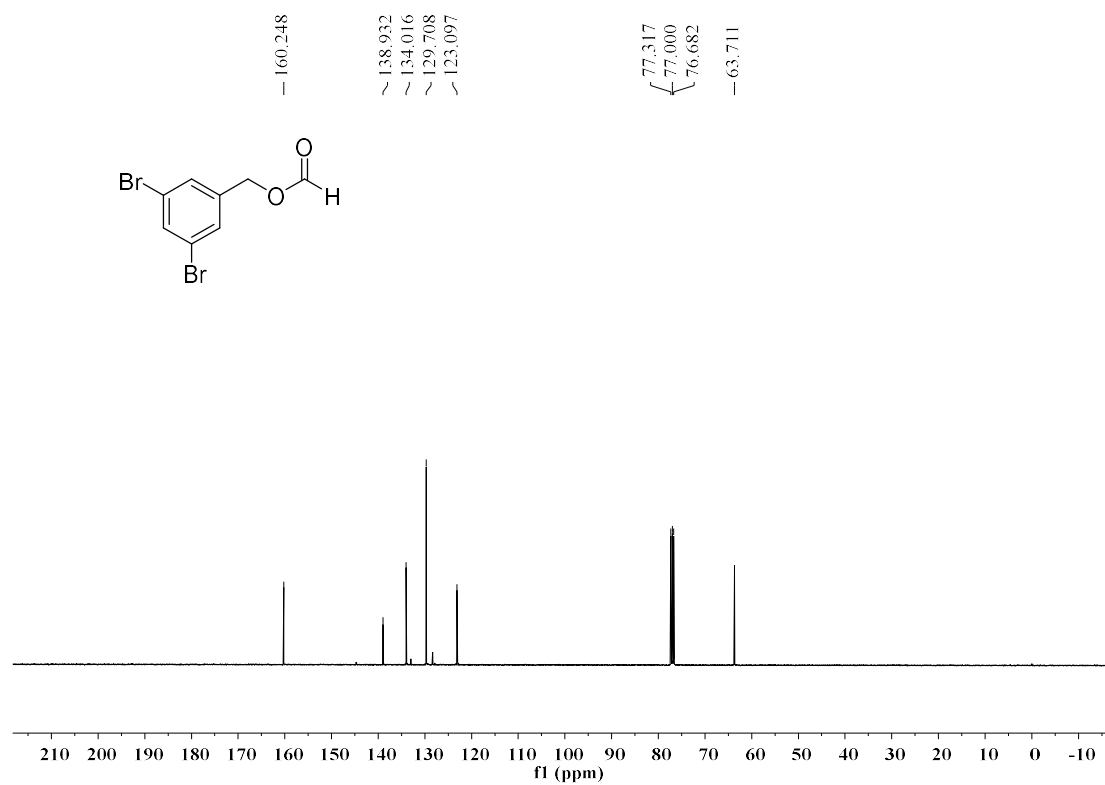

### <sup>1</sup>H NMR (400 MHz, CDCl<sub>3</sub>) spectrum of 2r

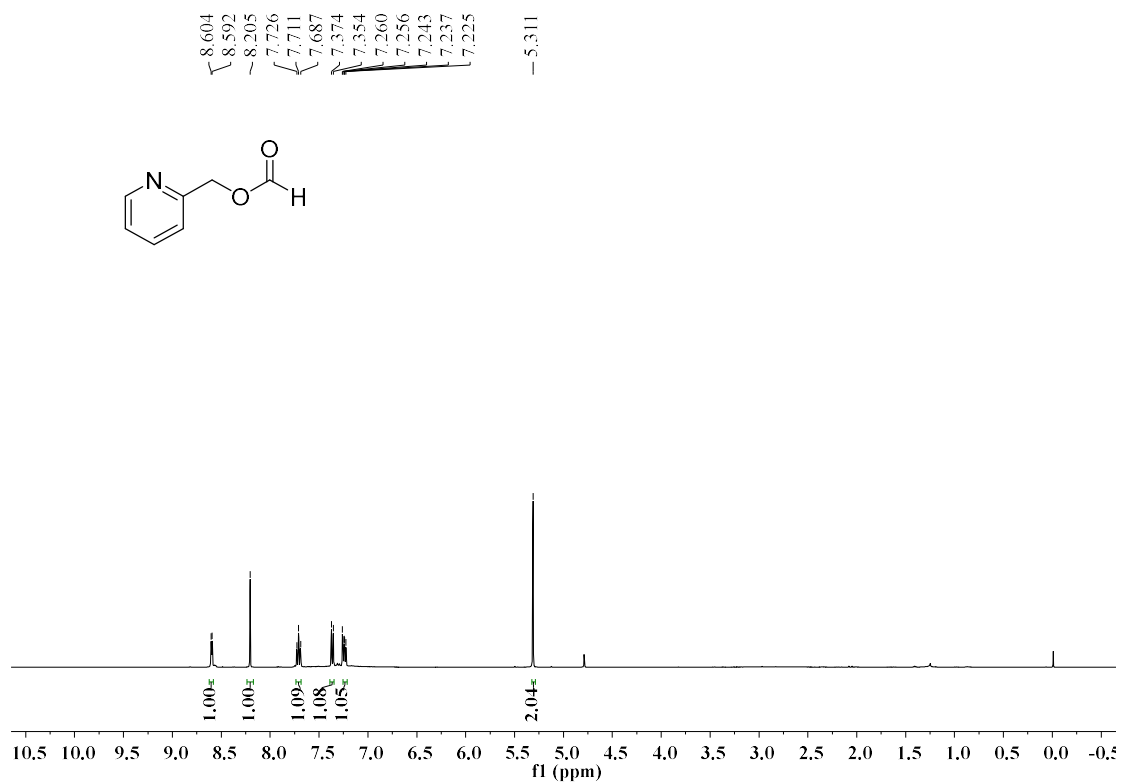

### <sup>13</sup>C NMR (100 MHz, CDCl<sub>3</sub>) spectrum of 2r

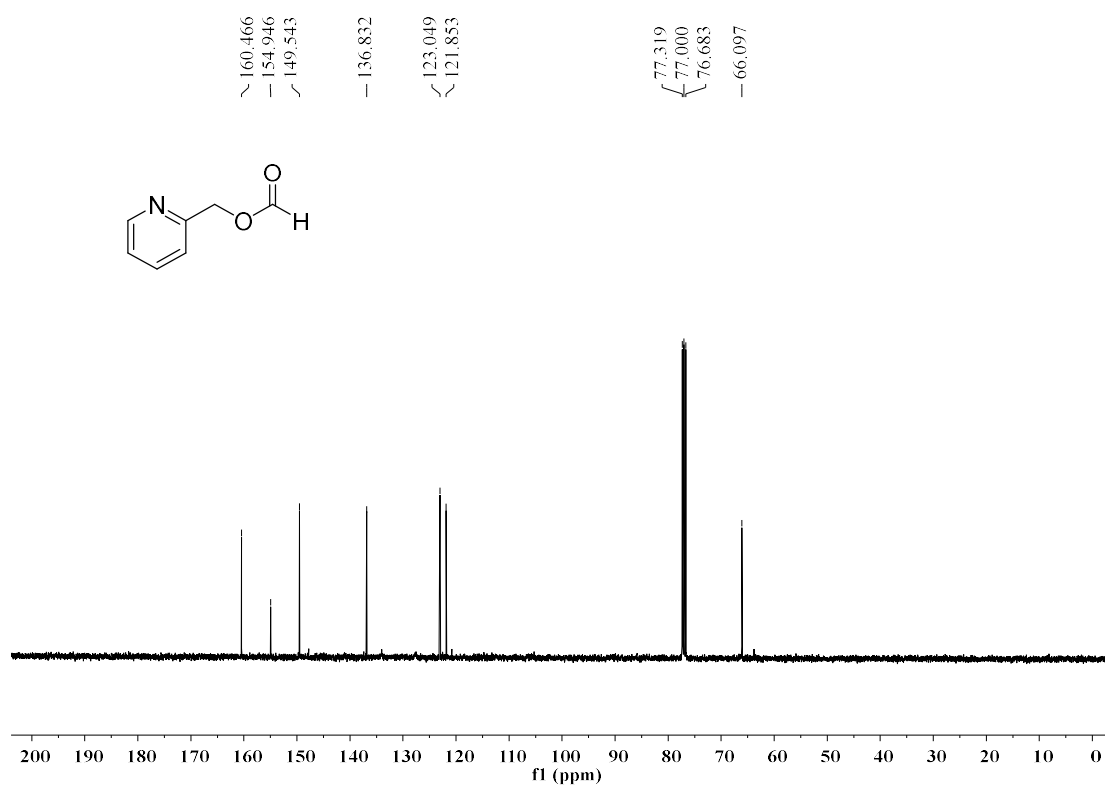

### <sup>1</sup>H NMR (400 MHz, CDCl<sub>3</sub>) spectrum of 2s

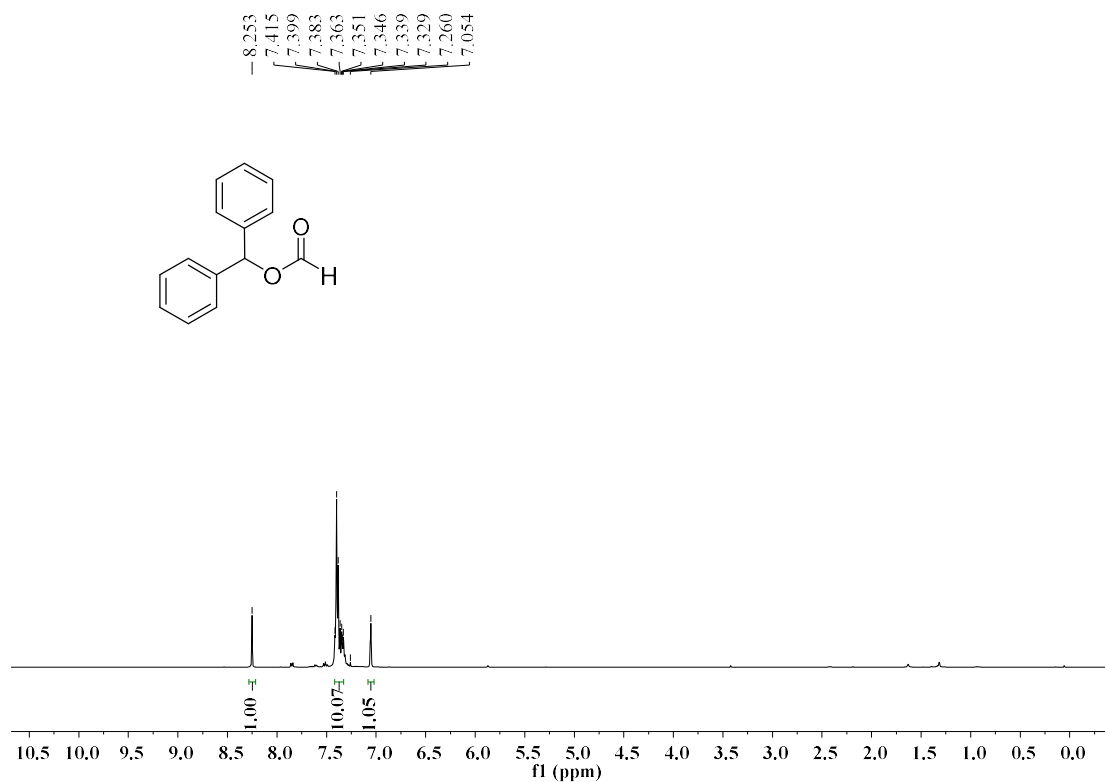

### <sup>13</sup>C NMR (100 MHz, CDCl<sub>3</sub>) spectrum of 2s

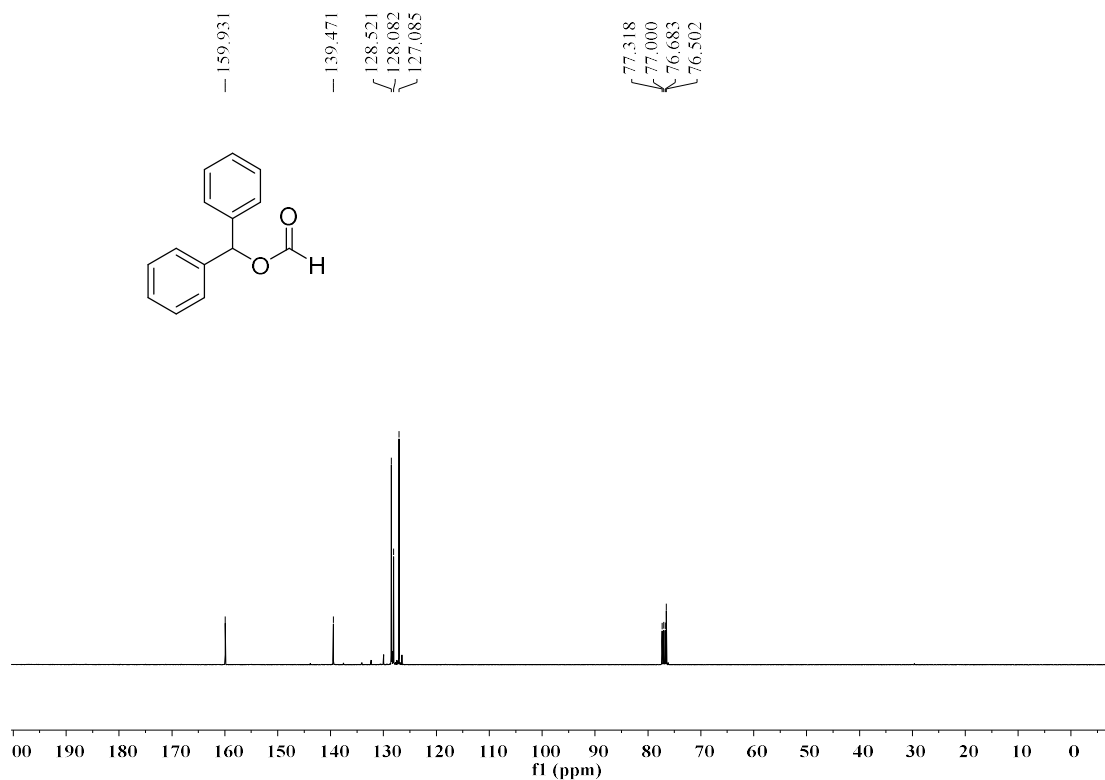

### <sup>1</sup>H NMR (400 MHz, CDCl<sub>3</sub>) spectrum of 2t

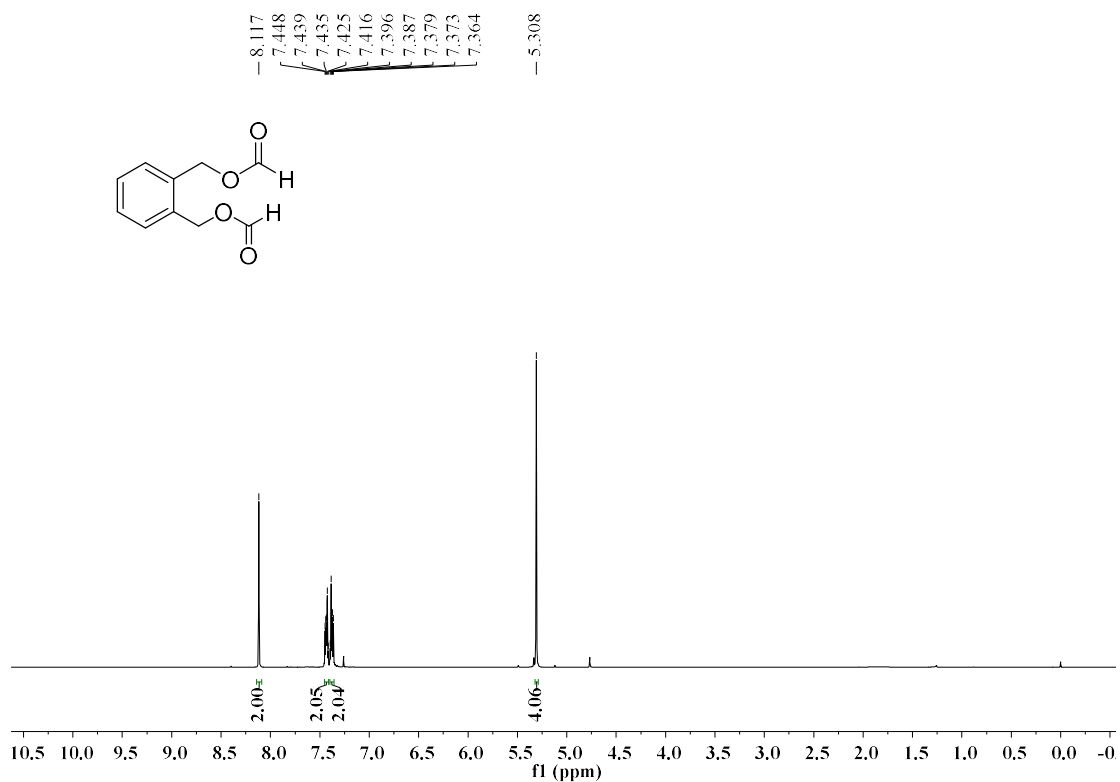

### <sup>13</sup>C NMR (100 MHz, CDCl<sub>3</sub>) spectrum of 2t

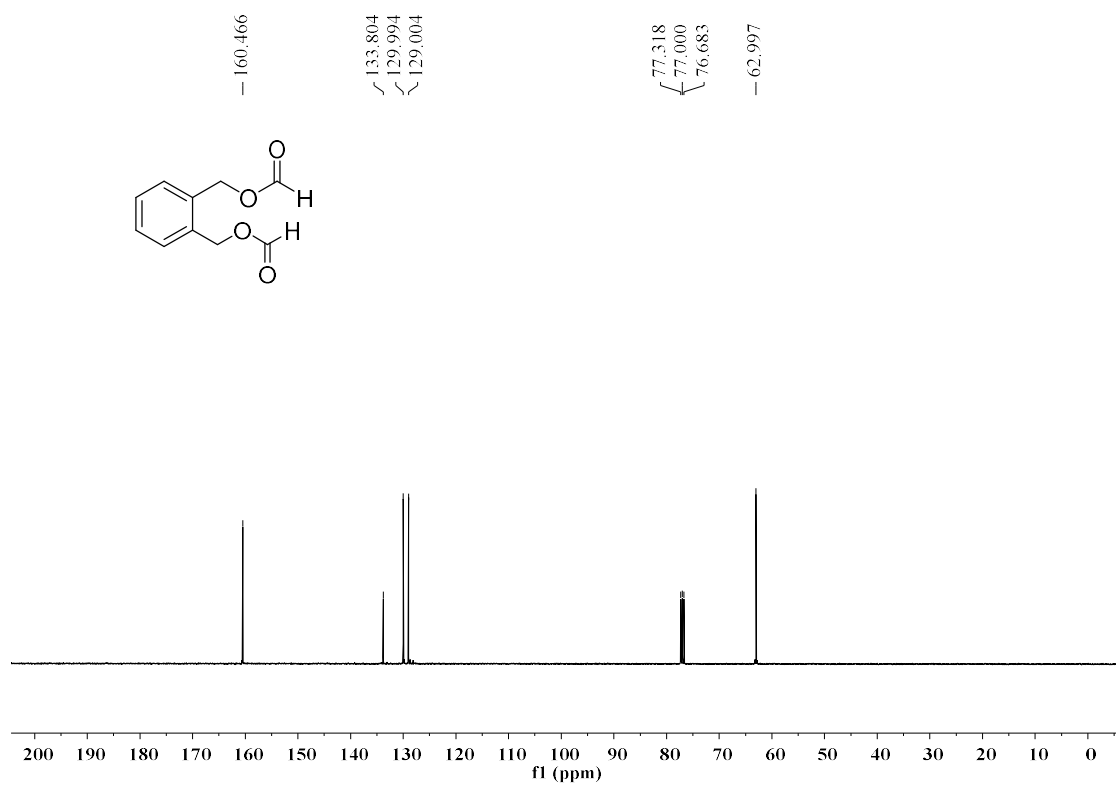

### <sup>1</sup>H NMR (400 MHz, CDCl<sub>3</sub>) spectrum of 2u

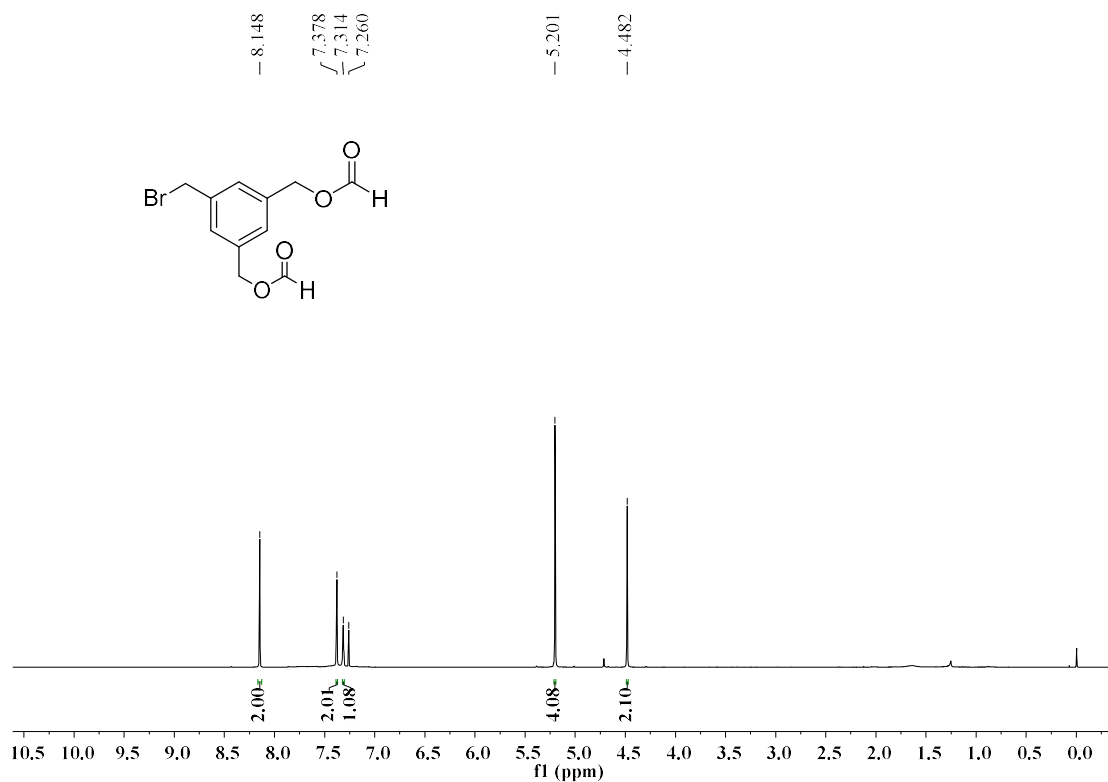

### <sup>13</sup>C NMR (100 MHz, CDCl<sub>3</sub>) spectrum of 2u

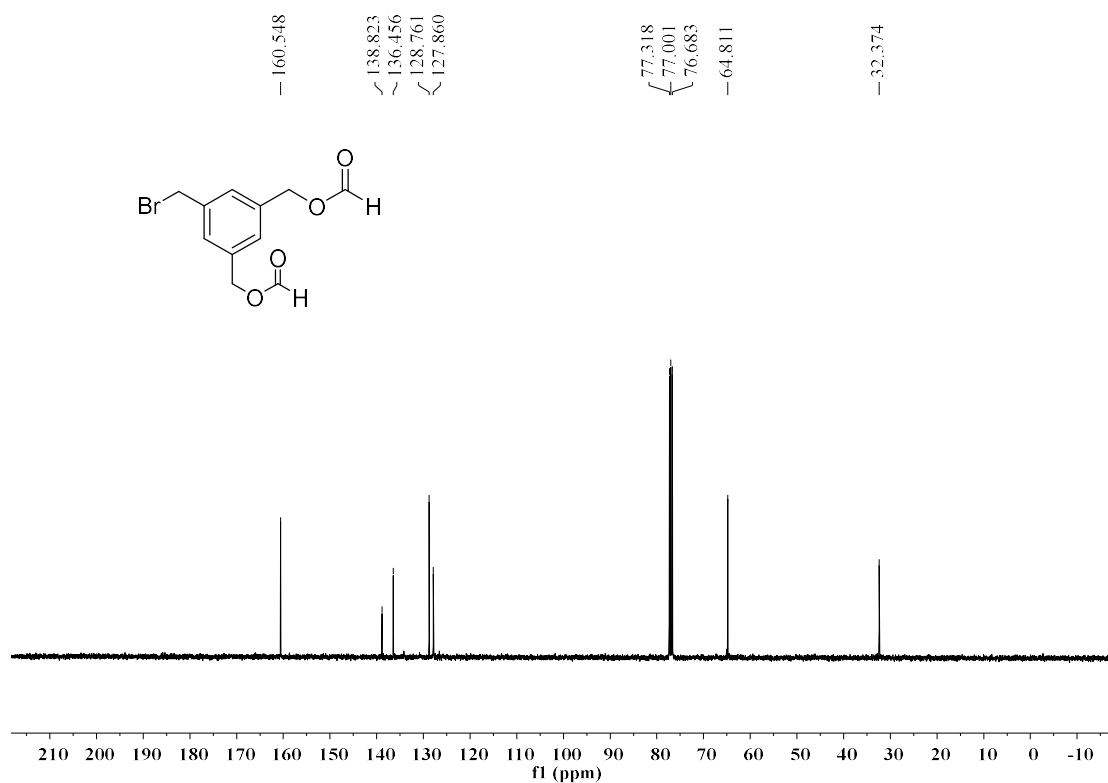

### <sup>1</sup>H NMR (400 MHz, CDCl<sub>3</sub>) spectrum of 2v

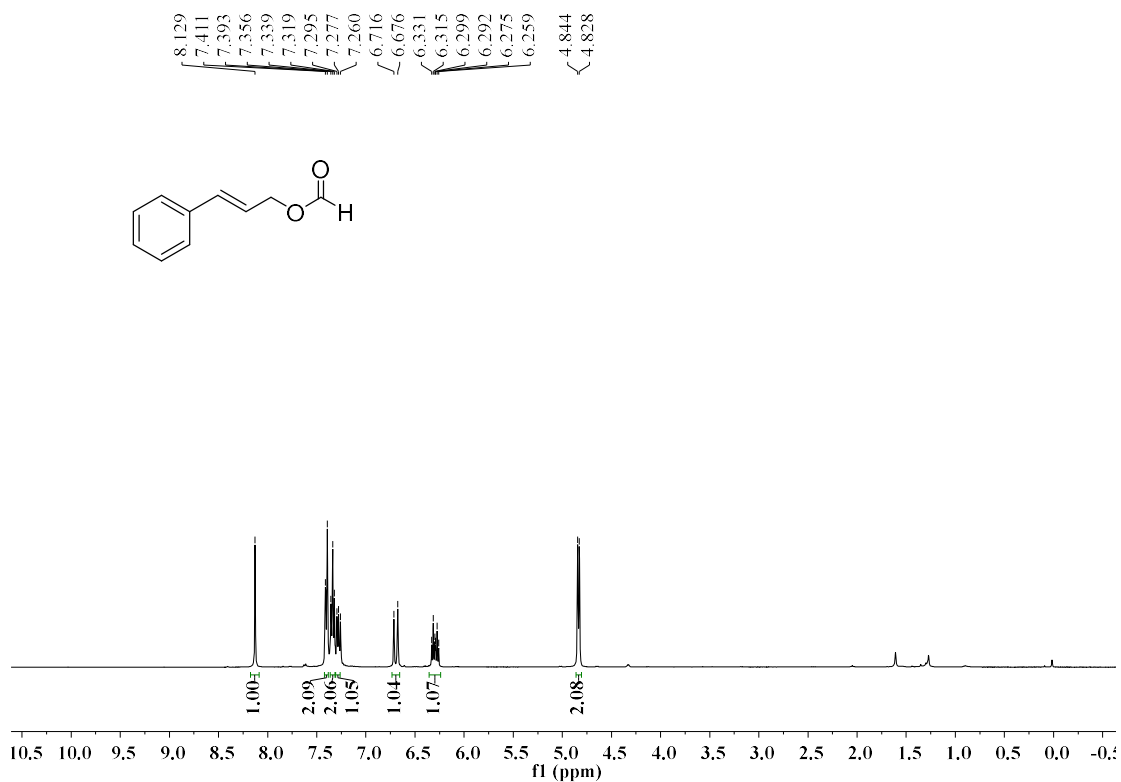

### <sup>13</sup>C NMR (100 MHz, CDCl<sub>3</sub>) spectrum of 2v

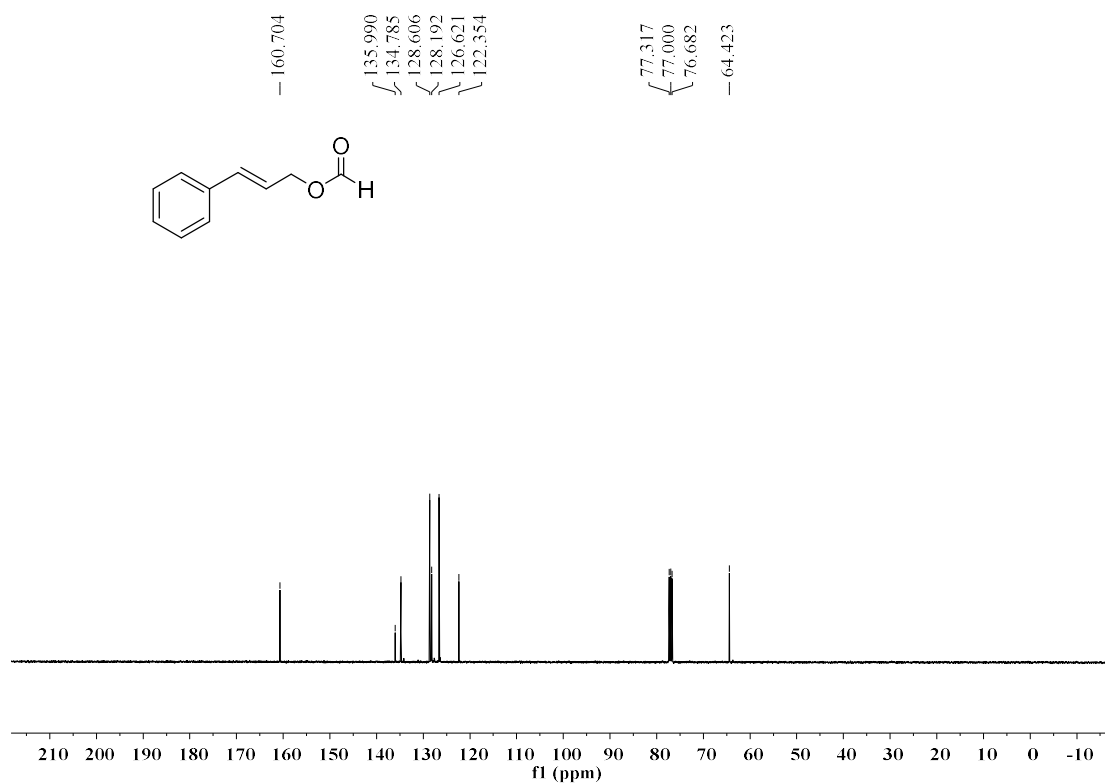

### <sup>1</sup>H NMR (400 MHz, CDCl<sub>3</sub>) spectrum of 2w

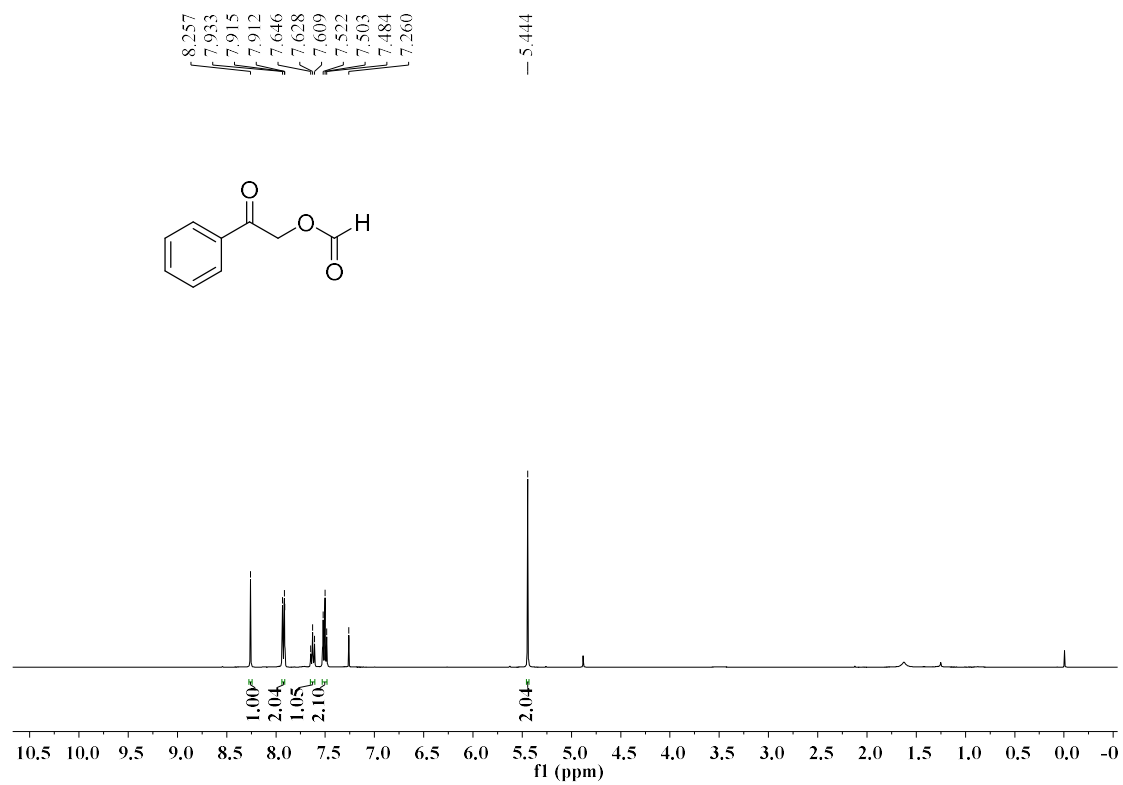

### <sup>13</sup>C NMR (100 MHz, CDCl<sub>3</sub>) spectrum of 2w

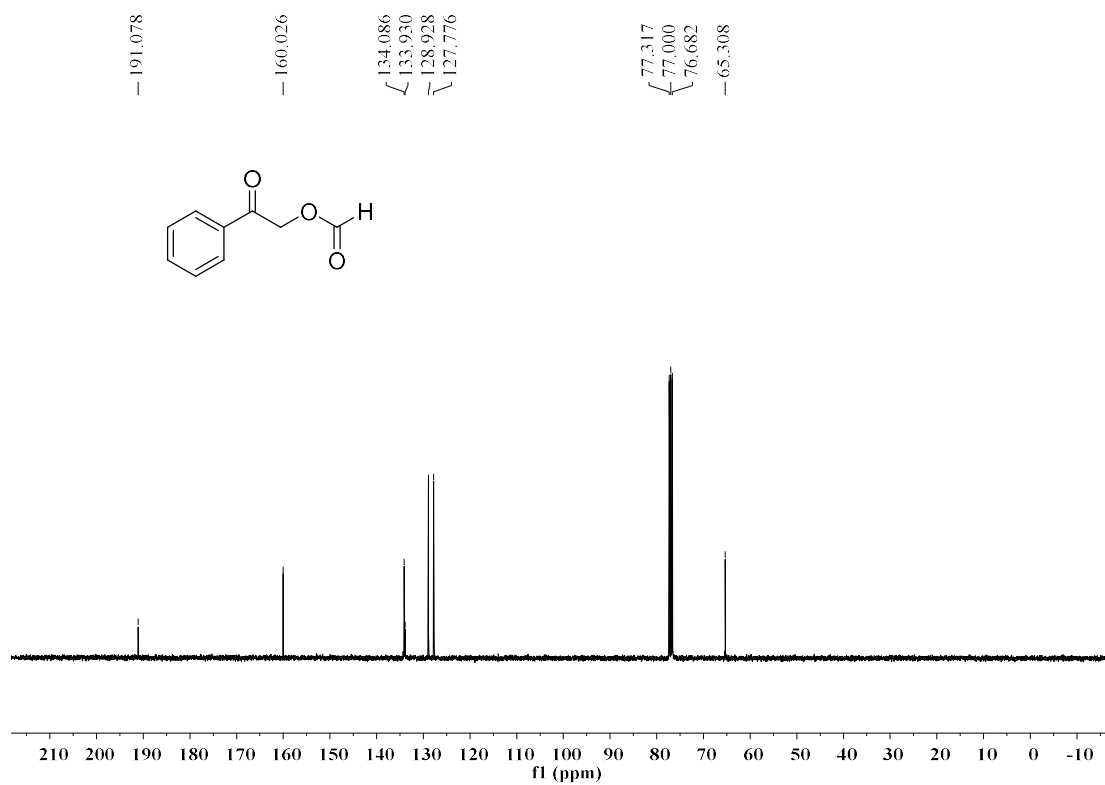

### <sup>1</sup>H NMR (400 MHz, CDCl<sub>3</sub>) spectrum of 2x

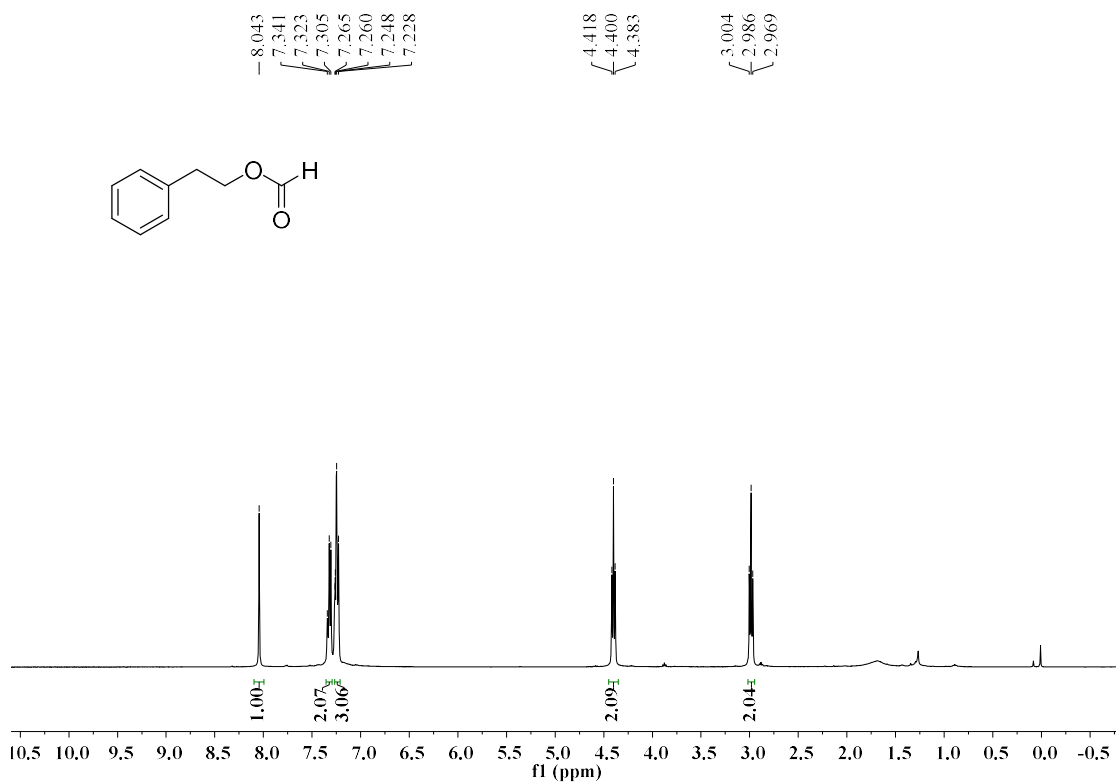

### <sup>13</sup>C NMR (100 MHz, CDCl<sub>3</sub>) spectrum of 2x

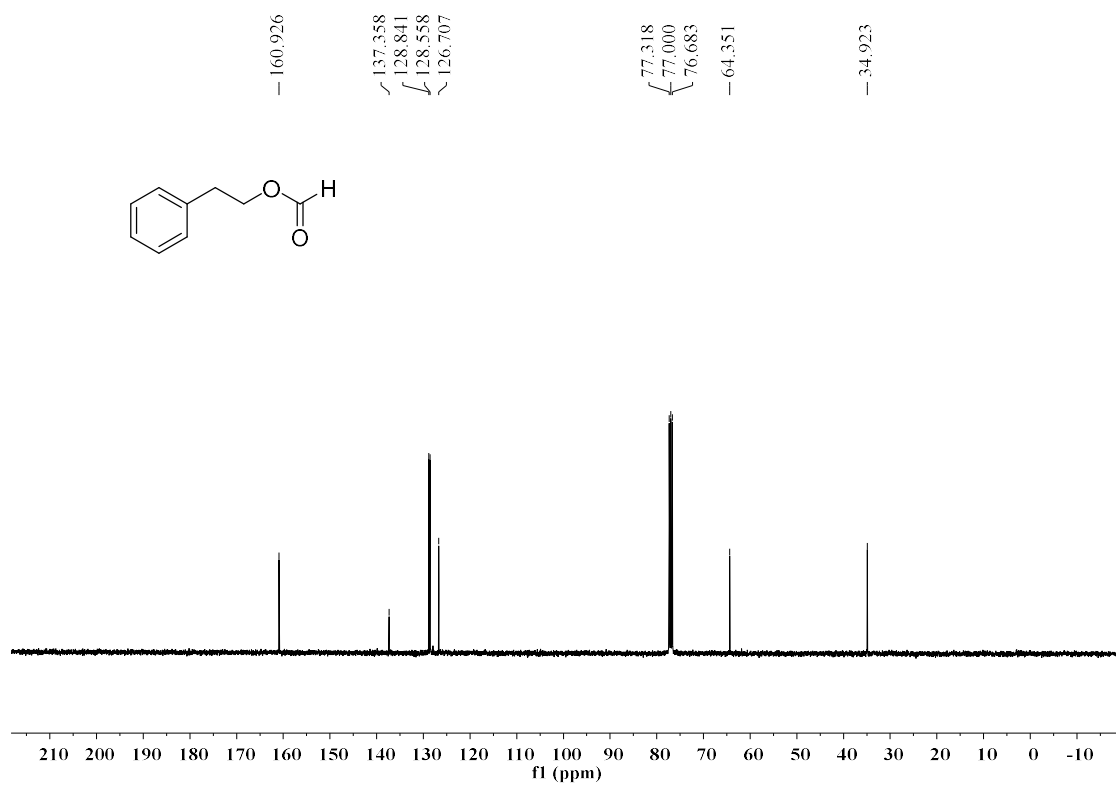

### <sup>1</sup>H NMR (400 MHz, CDCl<sub>3</sub>) spectrum of 2y

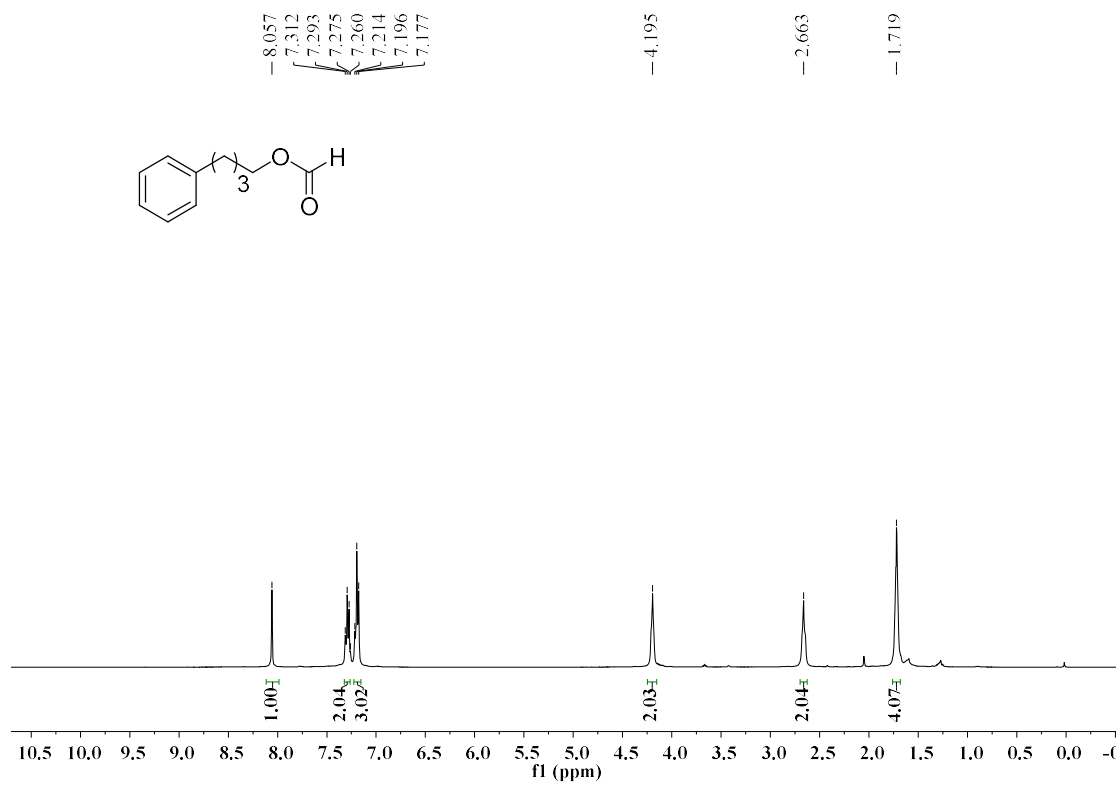

### <sup>13</sup>C NMR (100 MHz, CDCl<sub>3</sub>) spectrum of 2y

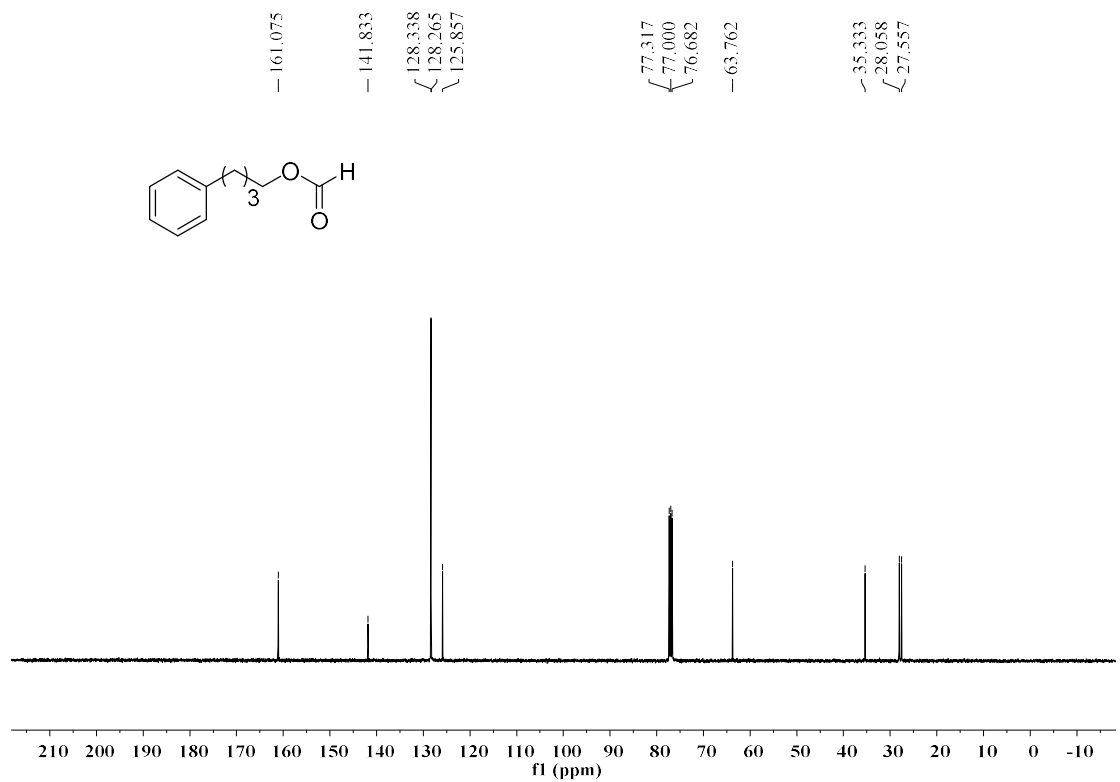

### <sup>1</sup>H NMR (400 MHz, CDCl<sub>3</sub>) spectrum of 2z

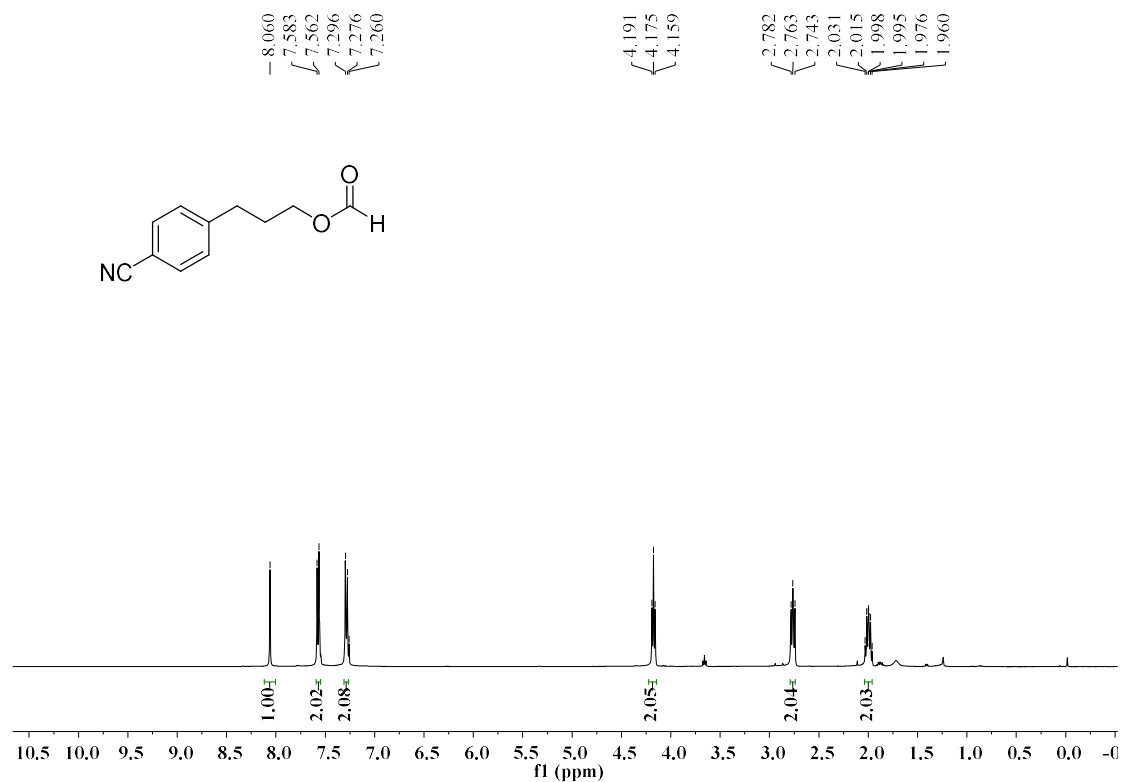

### <sup>13</sup>C NMR (100 MHz, CDCl<sub>3</sub>) spectrum of 2z

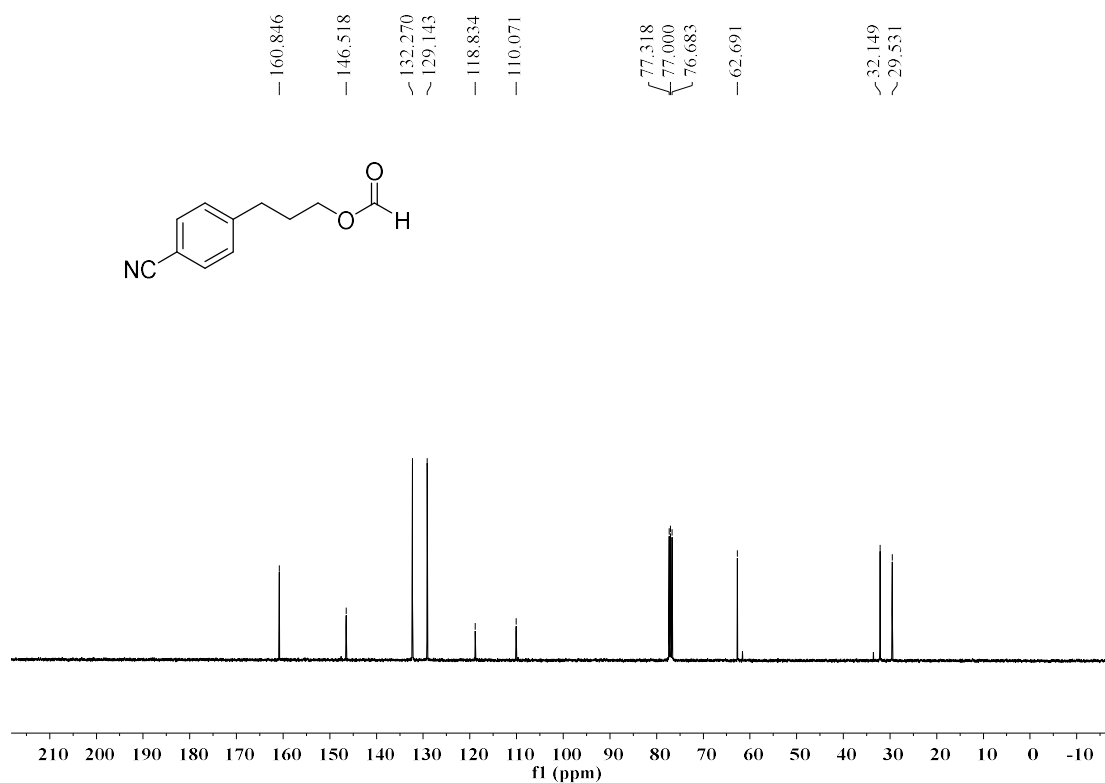

### <sup>1</sup>H NMR (400 MHz, CDCl<sub>3</sub>) spectrum of 2aa

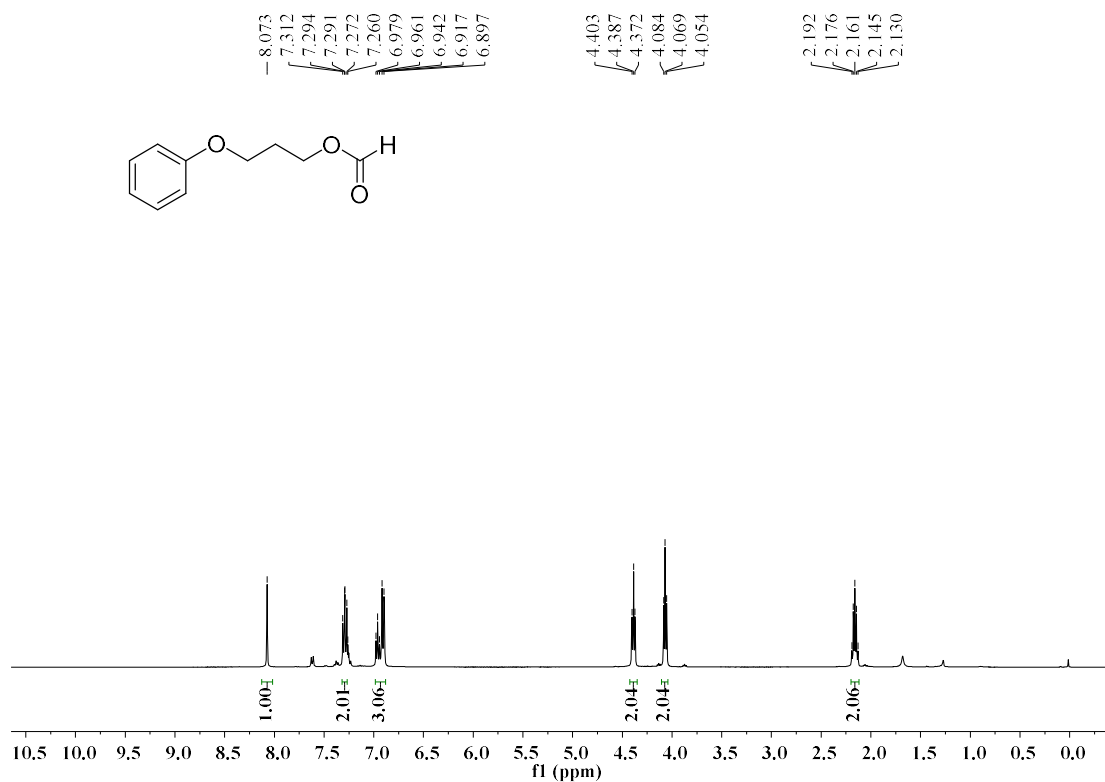

### <sup>13</sup>C NMR (100 MHz, CDCl<sub>3</sub>) spectrum of 2aa

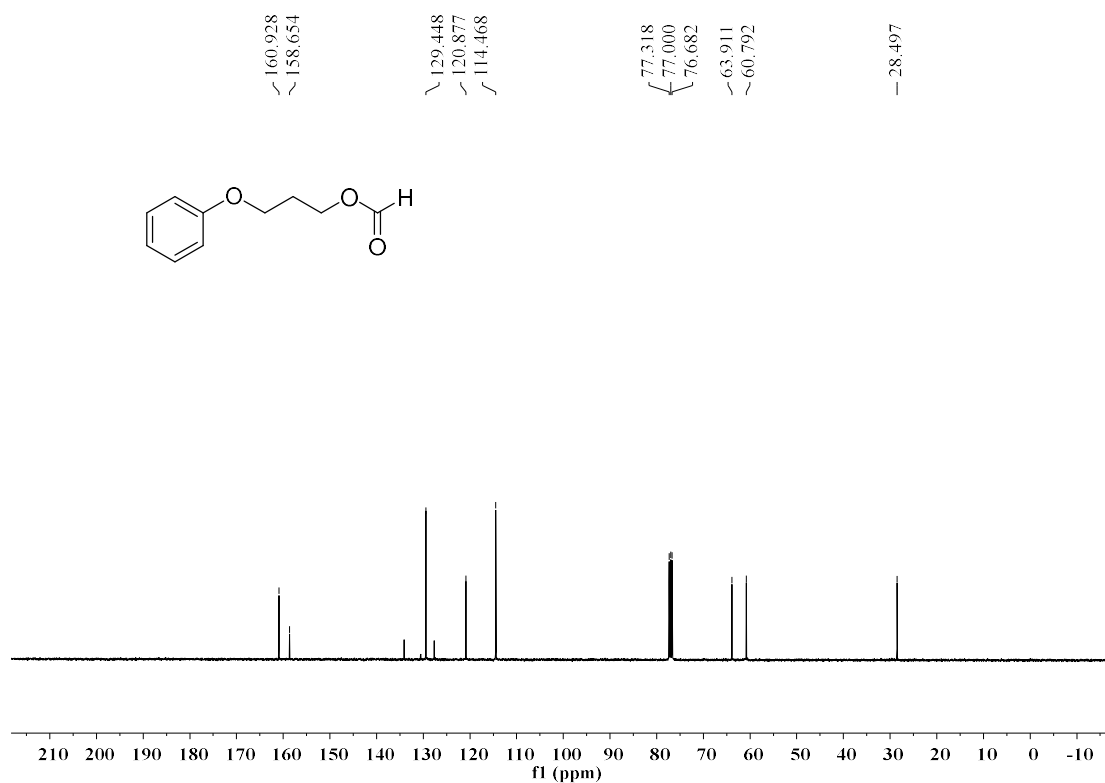

### <sup>1</sup>H NMR (400 MHz, CDCl<sub>3</sub>) spectrum of 2ab

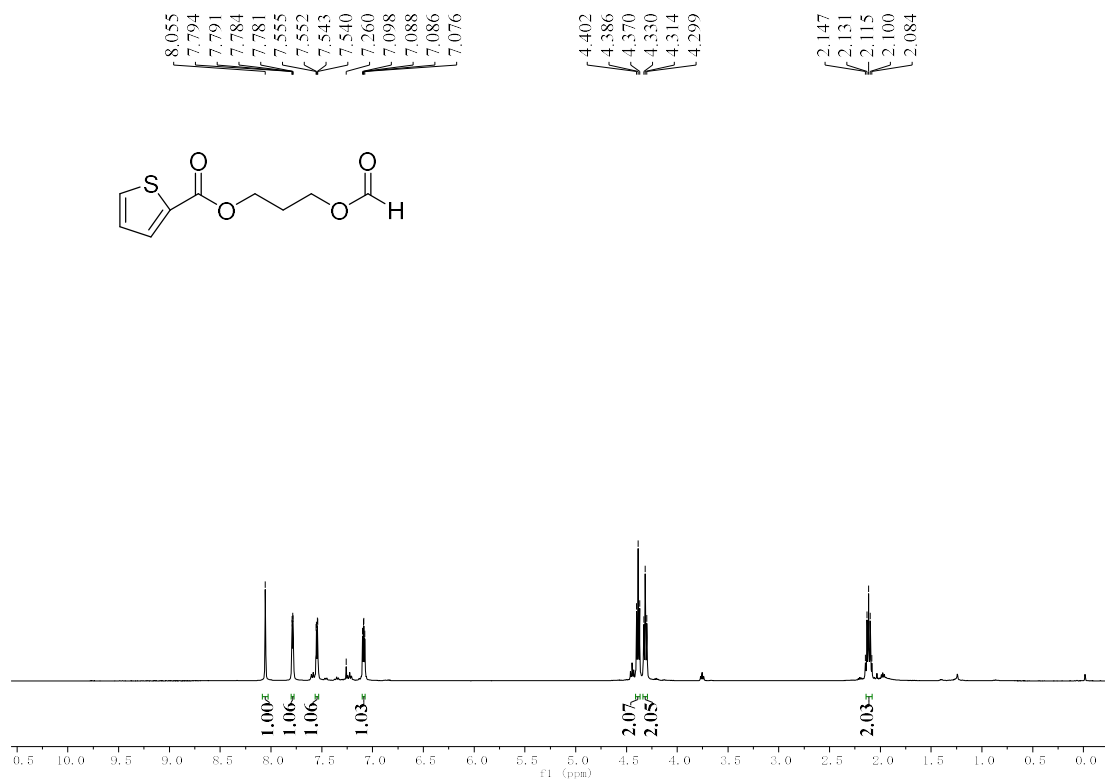

### <sup>13</sup>C NMR (100 MHz, CDCl<sub>3</sub>) spectrum of 2ab

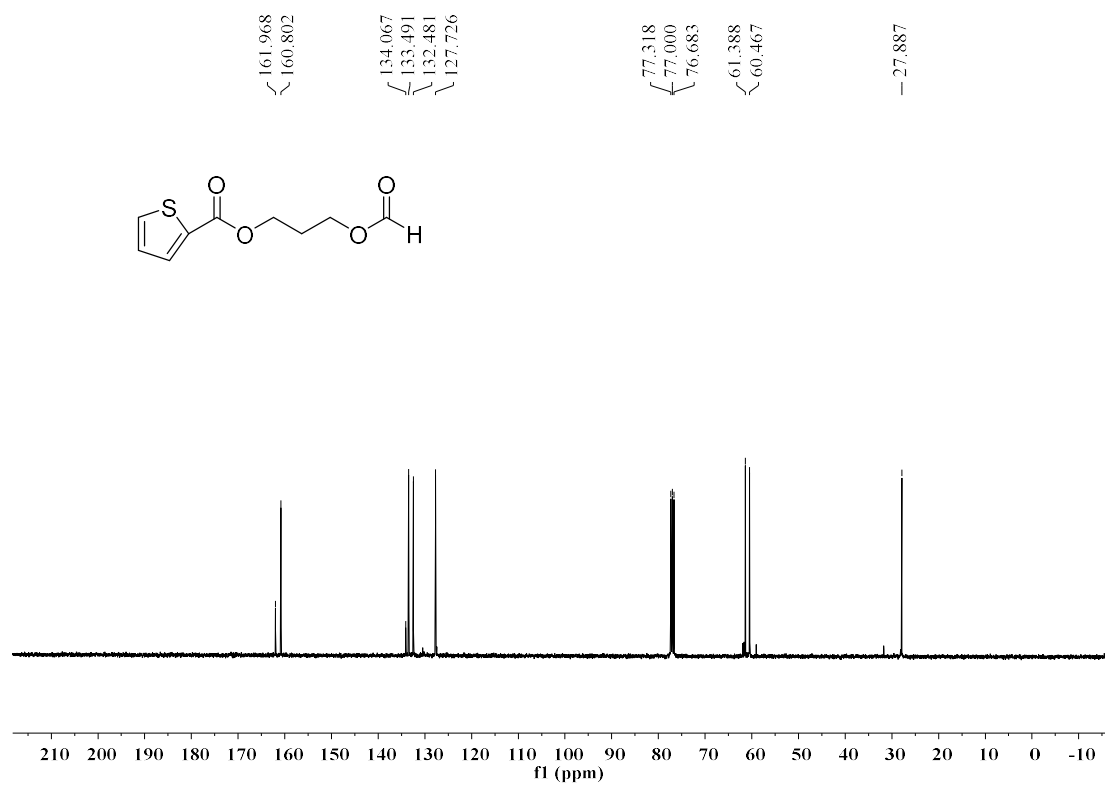

### <sup>1</sup>H NMR (400 MHz, CDCl<sub>3</sub>) spectrum of 2ac

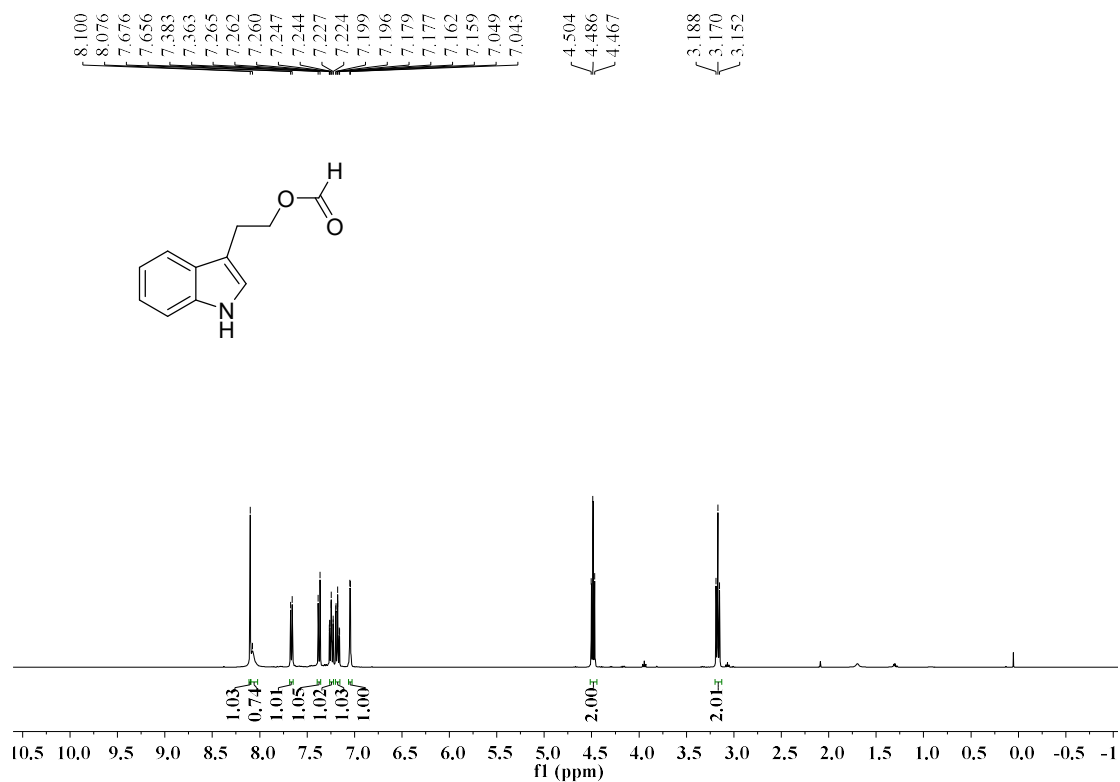

### <sup>13</sup>C NMR (100 MHz, CDCl<sub>3</sub>) spectrum of 2ac

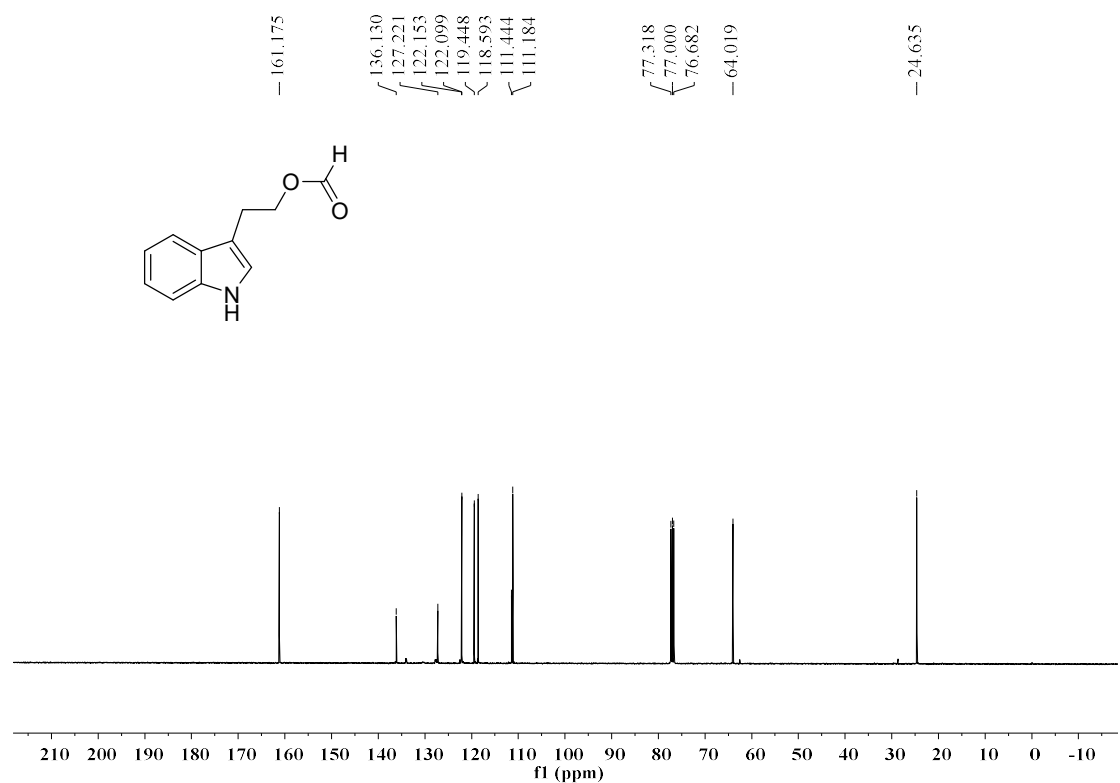

### <sup>1</sup>H NMR (400 MHz, CDCl<sub>3</sub>) spectrum of 2ad

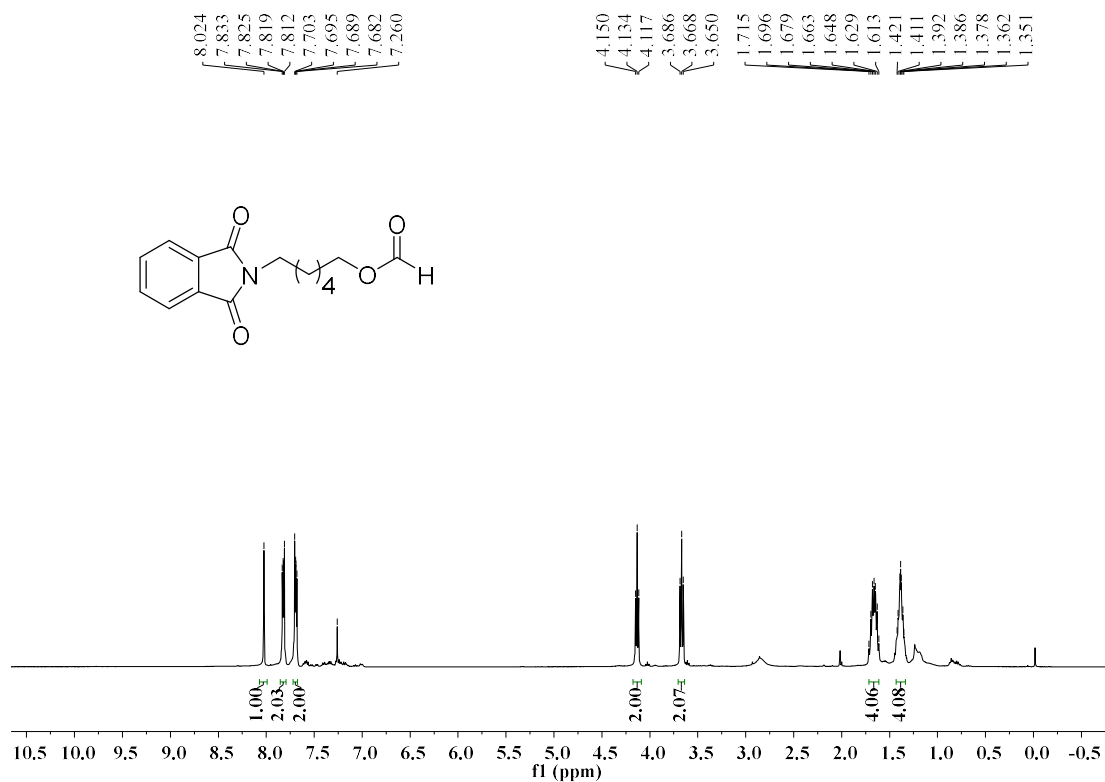

### <sup>13</sup>C NMR (100 MHz, CDCl<sub>3</sub>) spectrum of 2ad

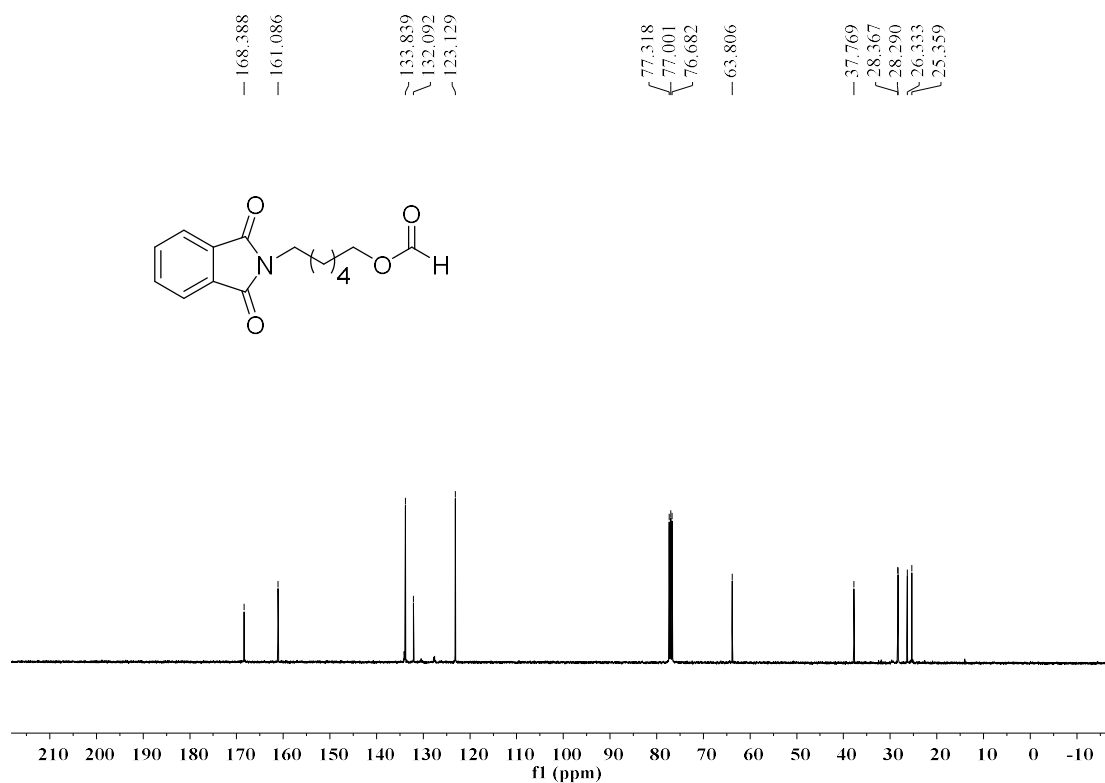

### <sup>1</sup>H NMR (400 MHz, CDCl<sub>3</sub>) spectrum of 2ae

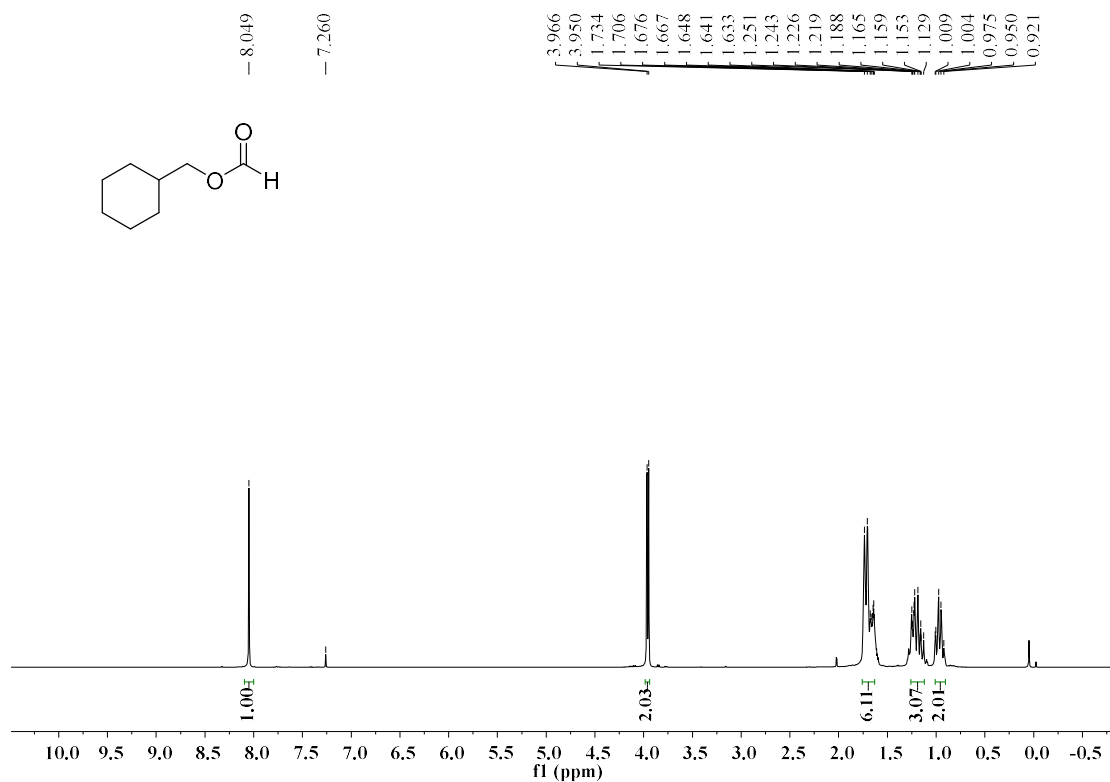

### <sup>13</sup>C NMR (100 MHz, CDCl<sub>3</sub>) spectrum of 2ae

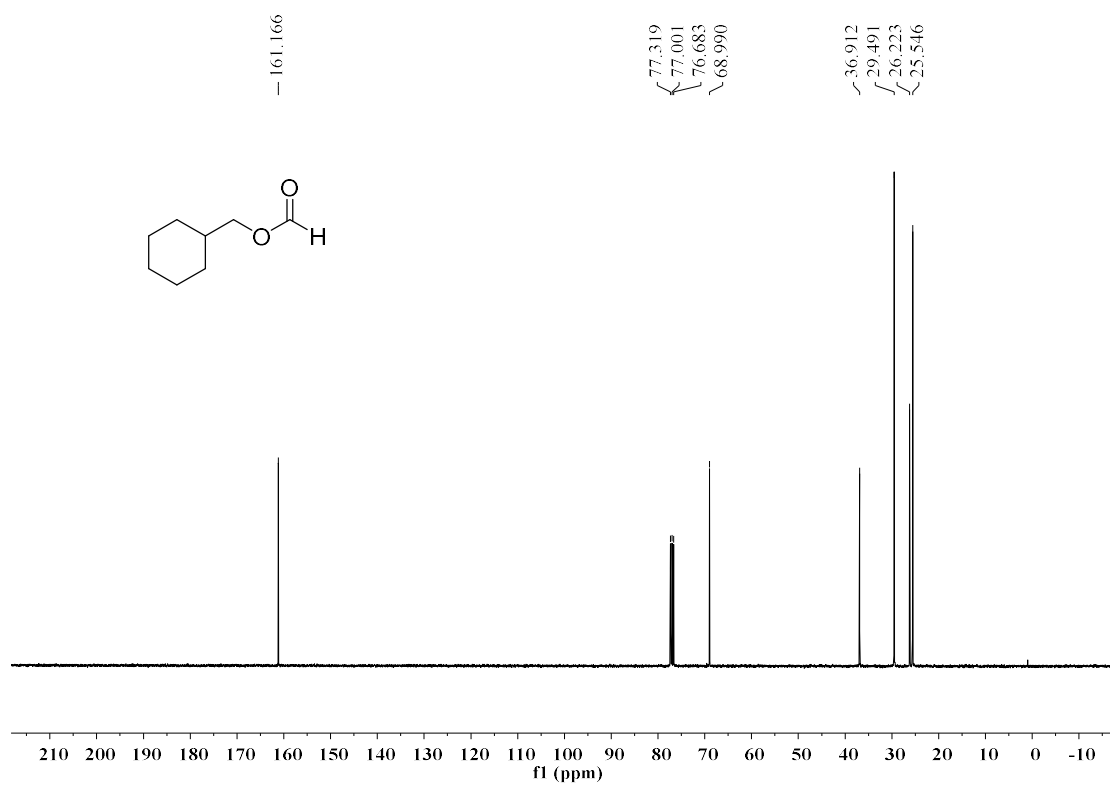

### <sup>1</sup>H NMR (400 MHz, CDCl<sub>3</sub>) spectrum of 2af

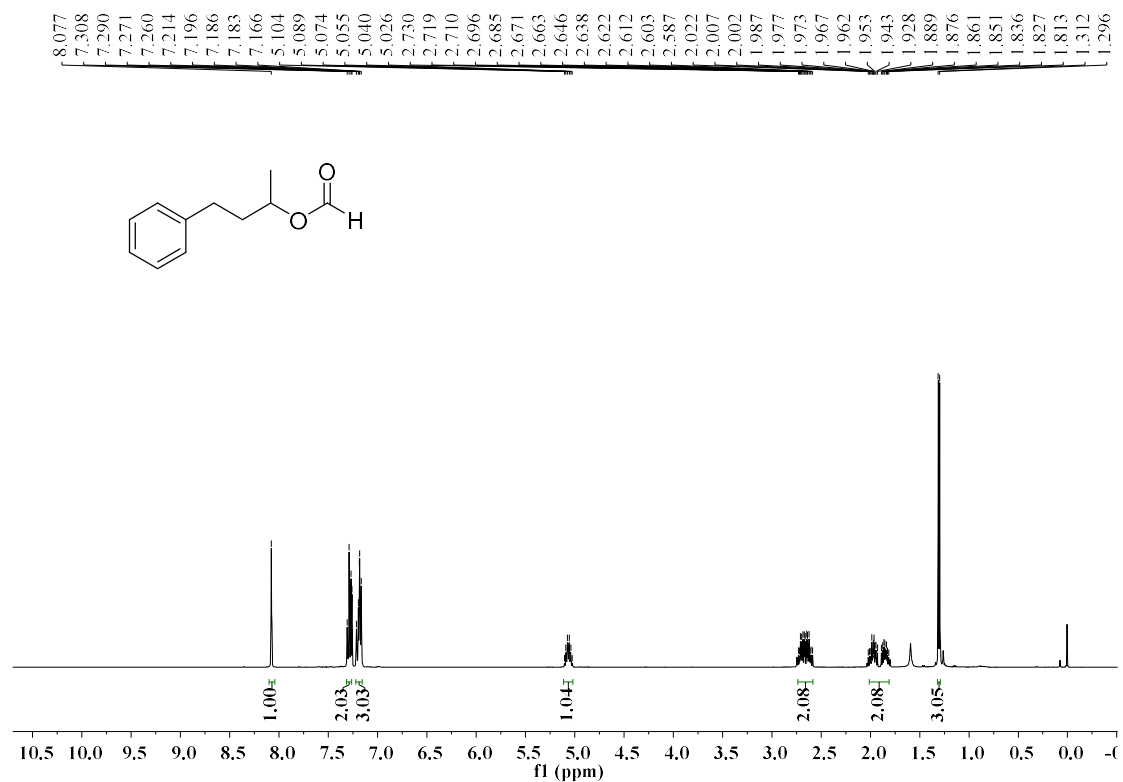

### <sup>13</sup>C NMR (100 MHz, CDCl<sub>3</sub>) spectrum of 2af

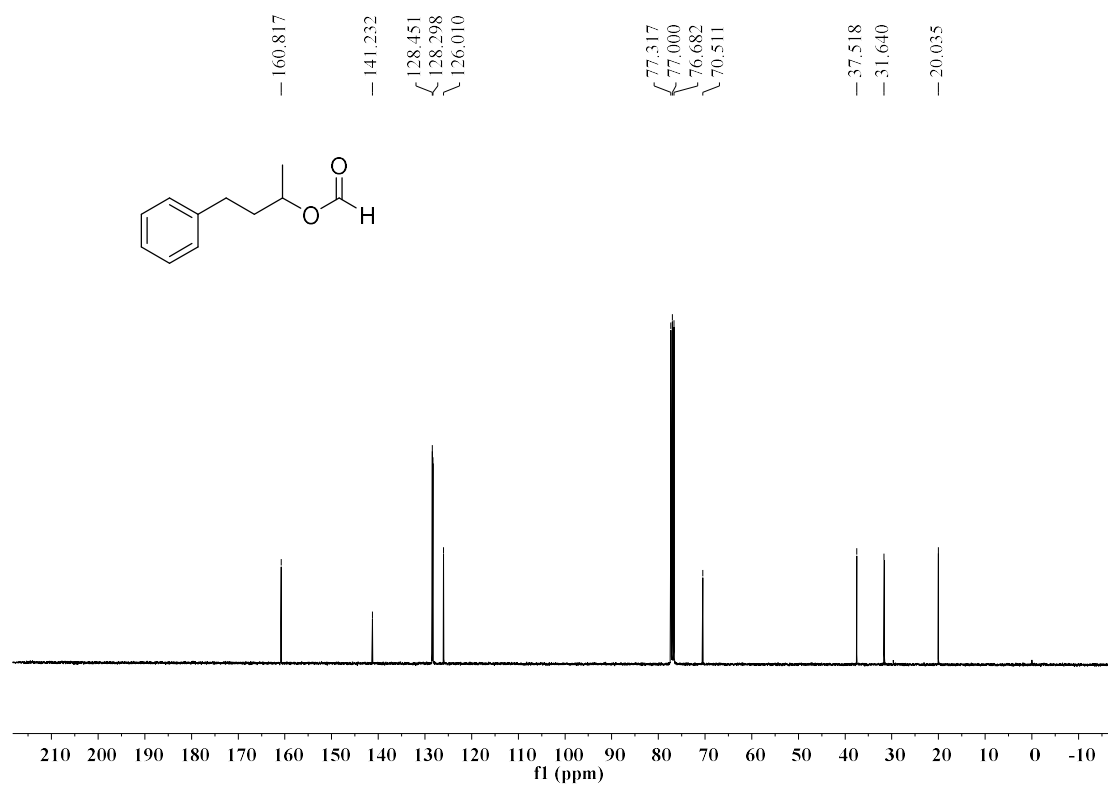

### <sup>1</sup>H NMR (400 MHz, CDCl<sub>3</sub>) spectrum of 2ah

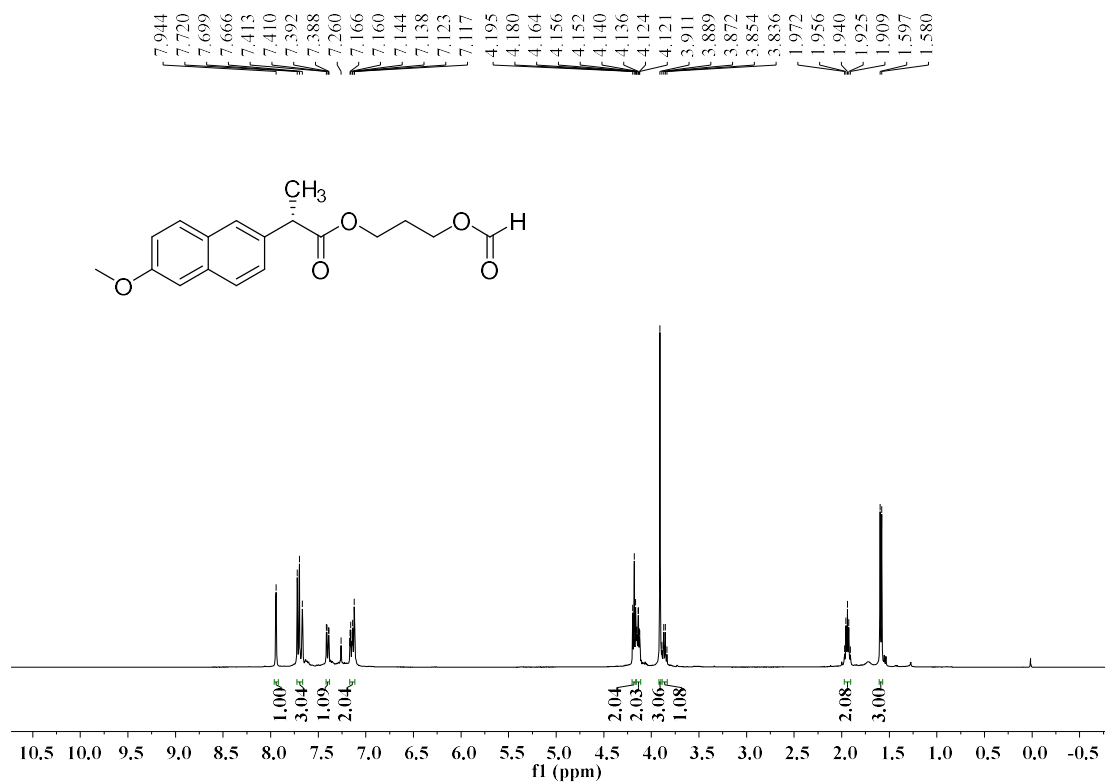

### <sup>13</sup>C NMR (100 MHz, CDCl<sub>3</sub>) spectrum of 2ah

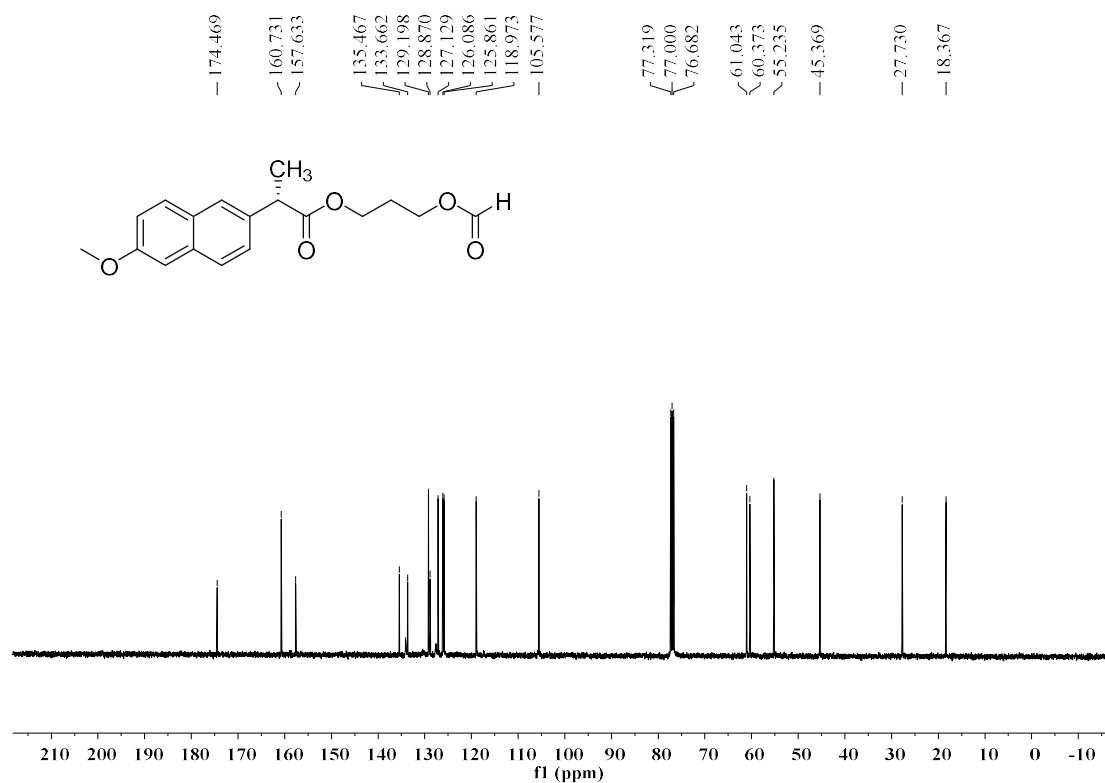

### <sup>1</sup>H NMR (400 MHz, CDCl<sub>3</sub>) spectrum of 2ai

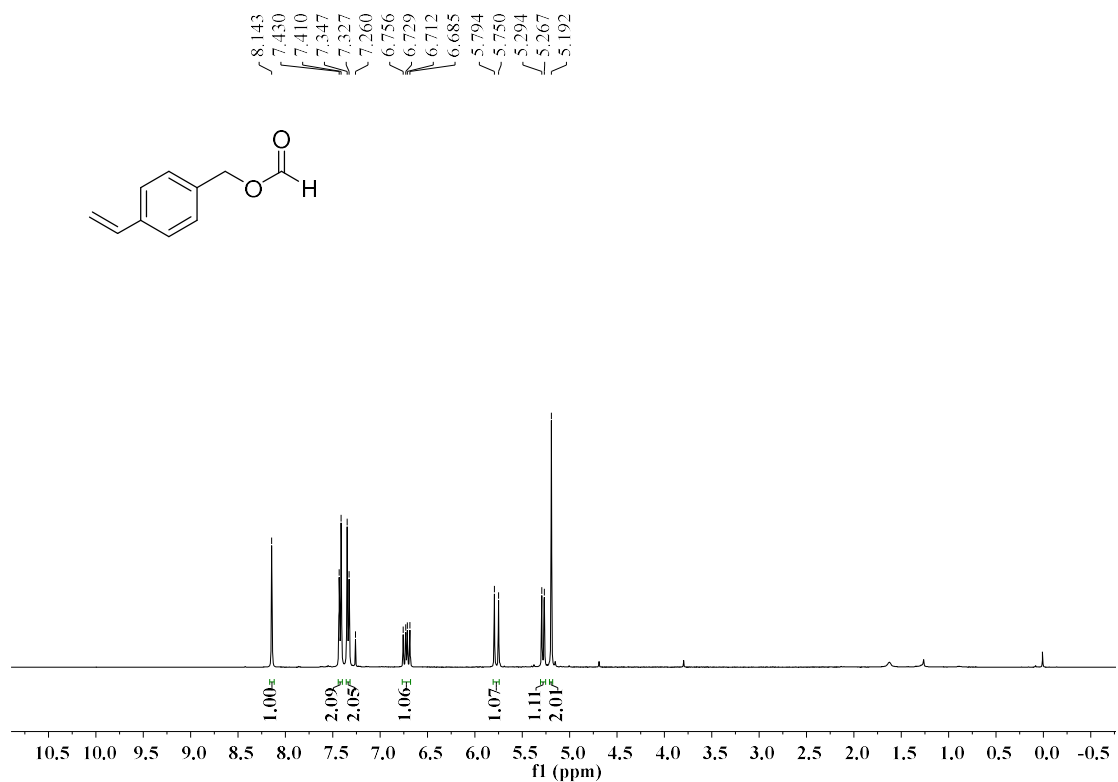

### <sup>13</sup>C NMR (100 MHz, CDCl<sub>3</sub>) spectrum of 2ai

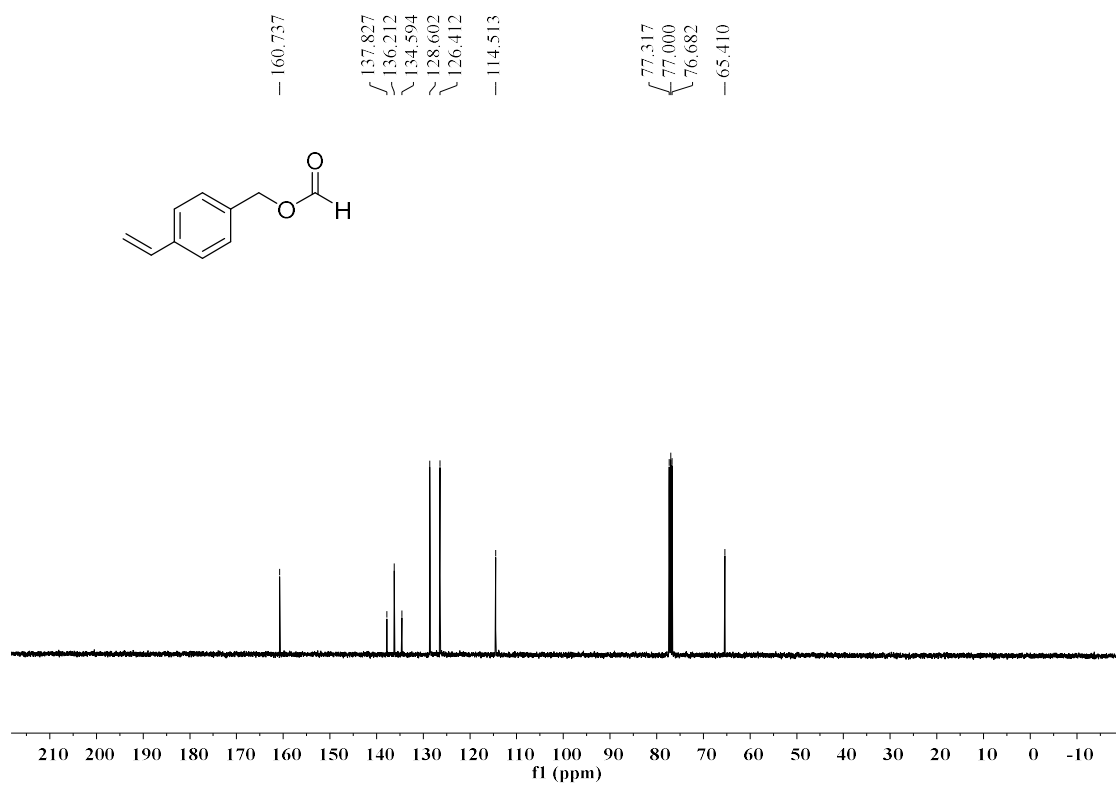

### <sup>1</sup>H NMR (400 MHz, CDCl<sub>3</sub>) spectrum of 2aj

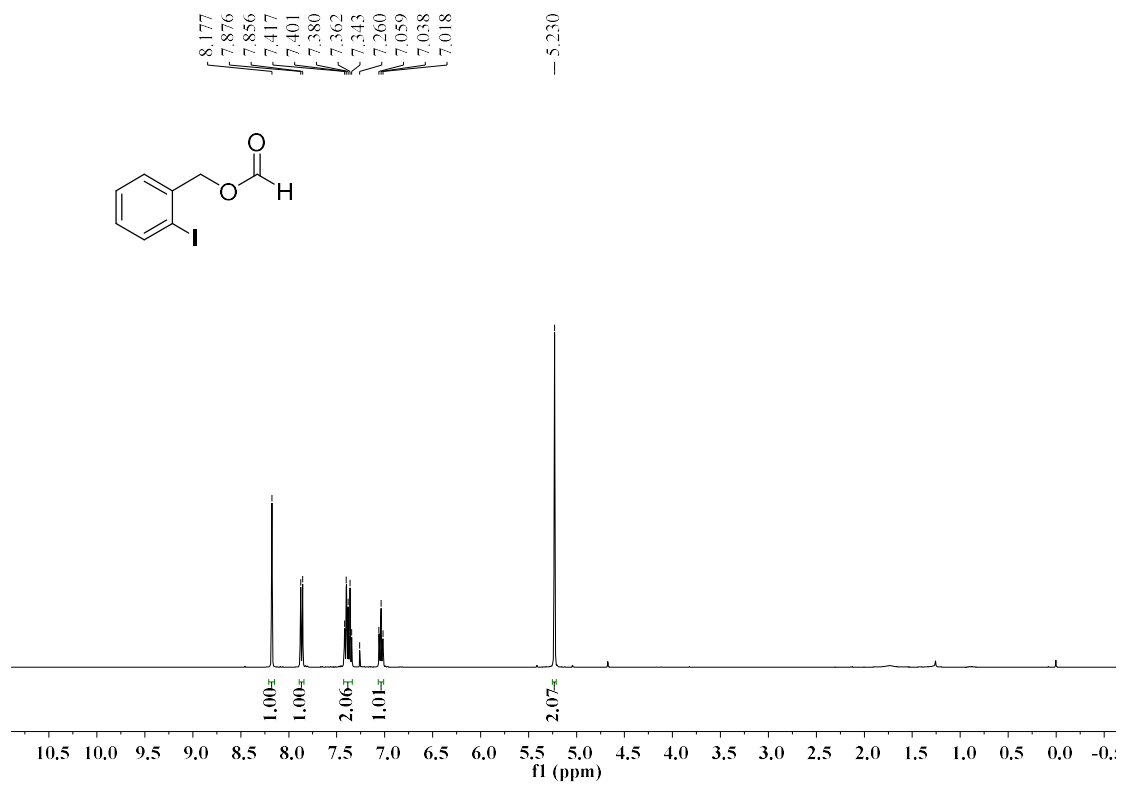

### <sup>13</sup>C NMR (100 MHz, CDCl<sub>3</sub>) spectrum of 2aj

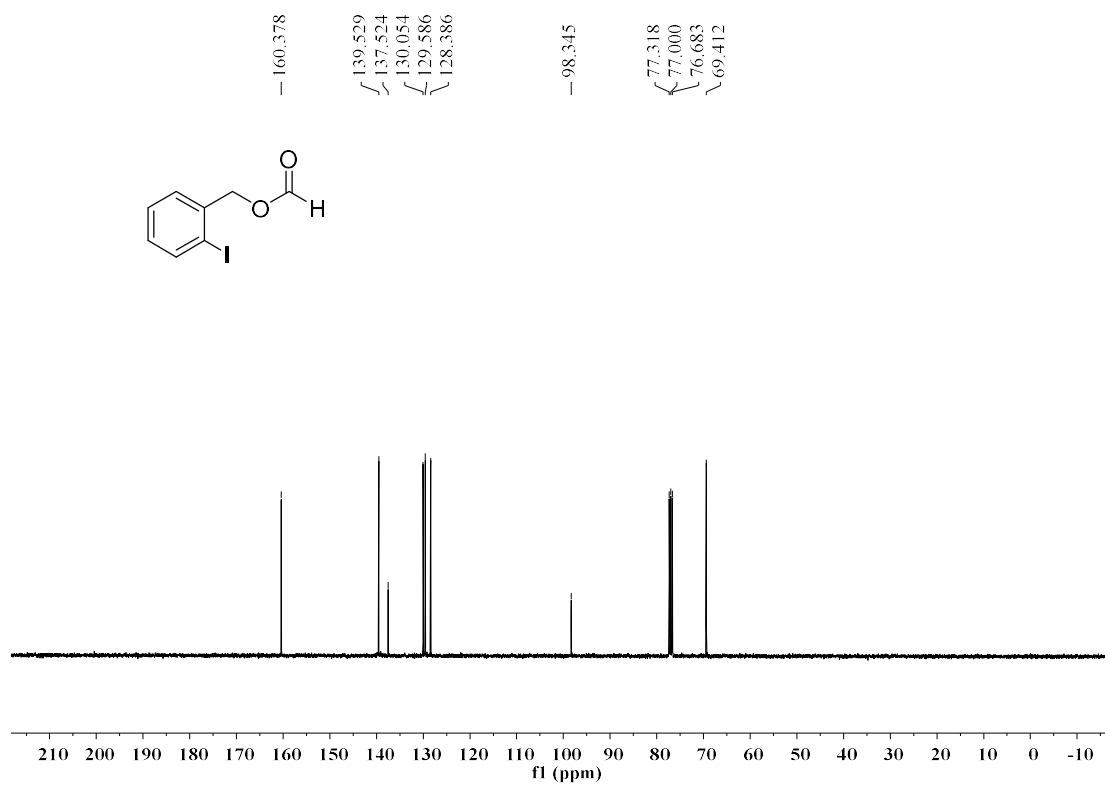

**<sup>1</sup>H NMR (400 MHz, CDCl<sub>3</sub>) spectrum of 2ak**

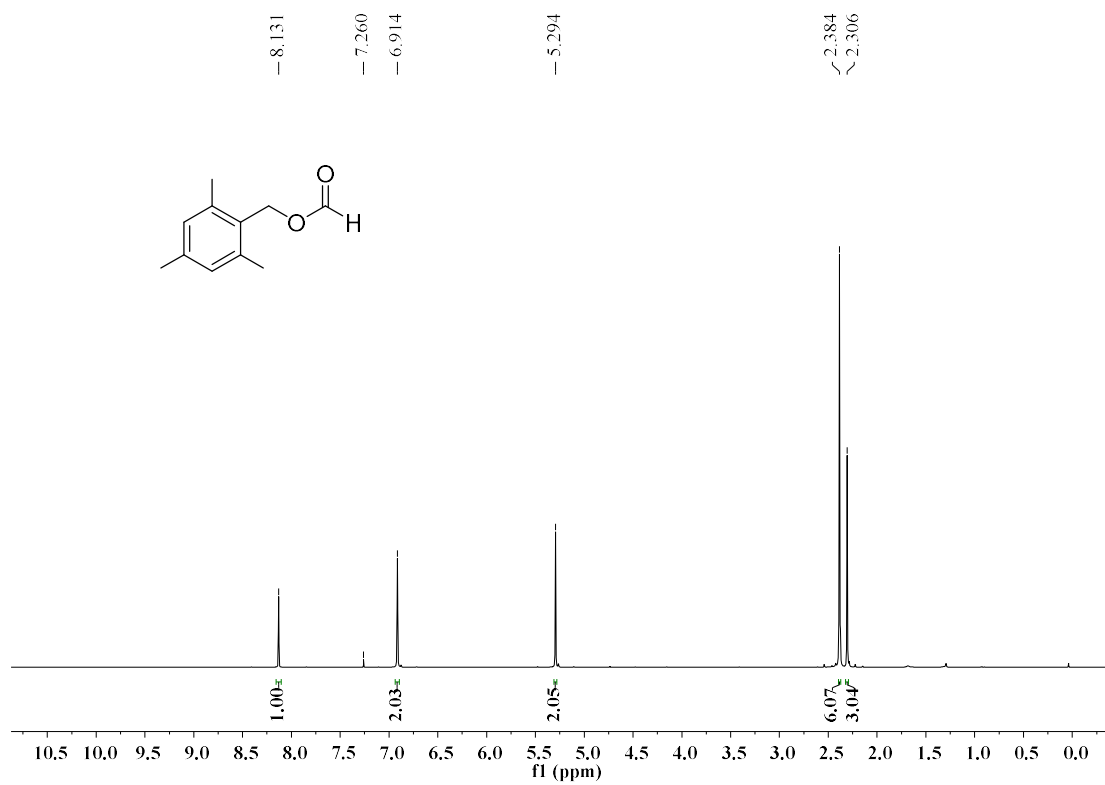

**<sup>13</sup>C NMR (100 MHz, CDCl<sub>3</sub>) spectrum of 2ak**

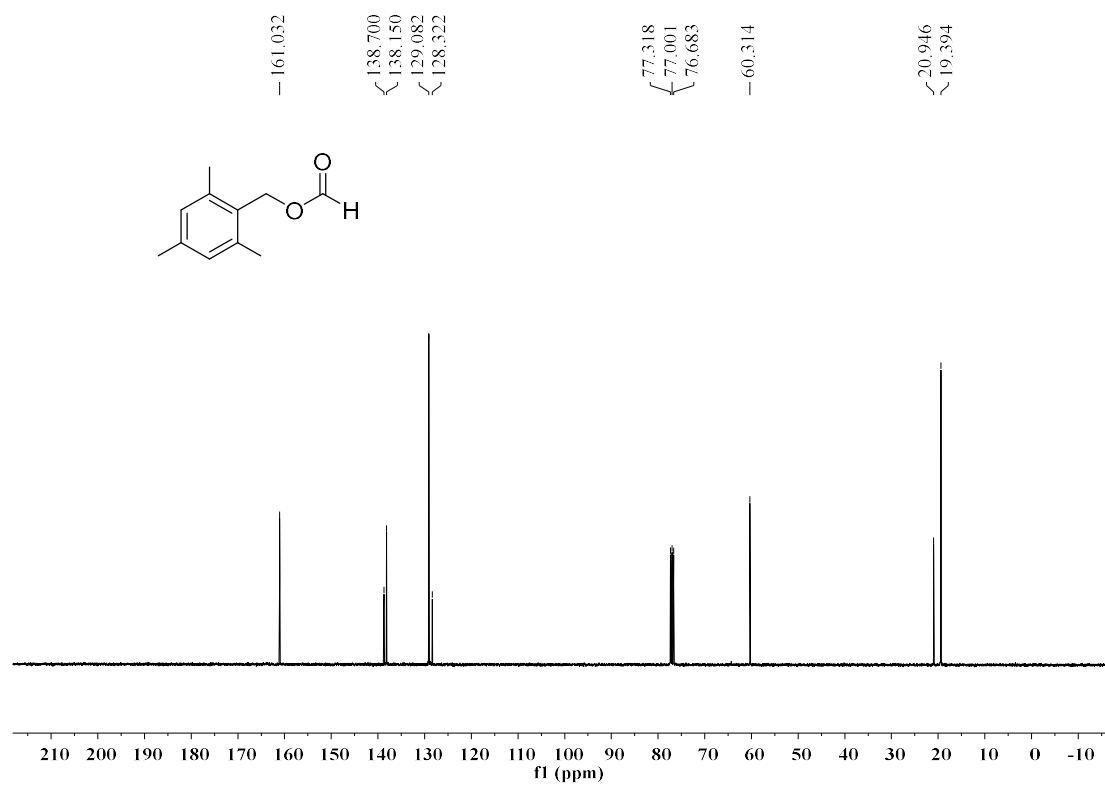

### <sup>1</sup>H NMR (400 MHz, CDCl<sub>3</sub>) spectrum of 2aI

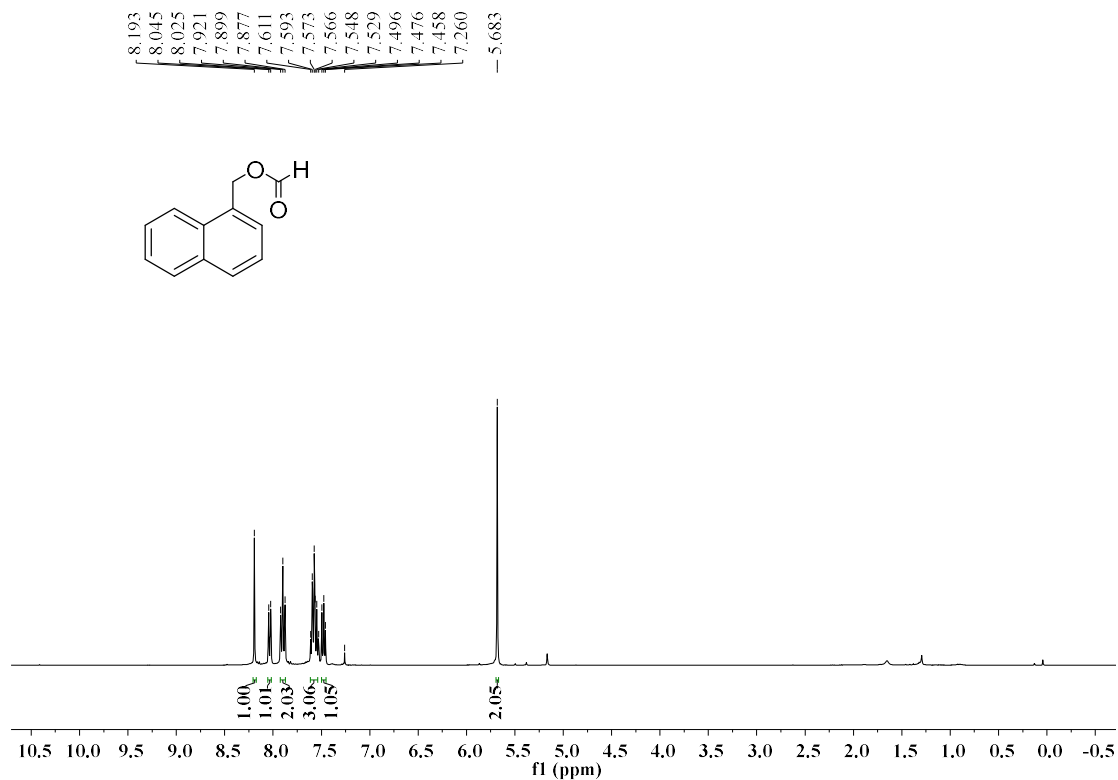

### <sup>13</sup>C NMR (100 MHz, CDCl<sub>3</sub>) spectrum of 2aI

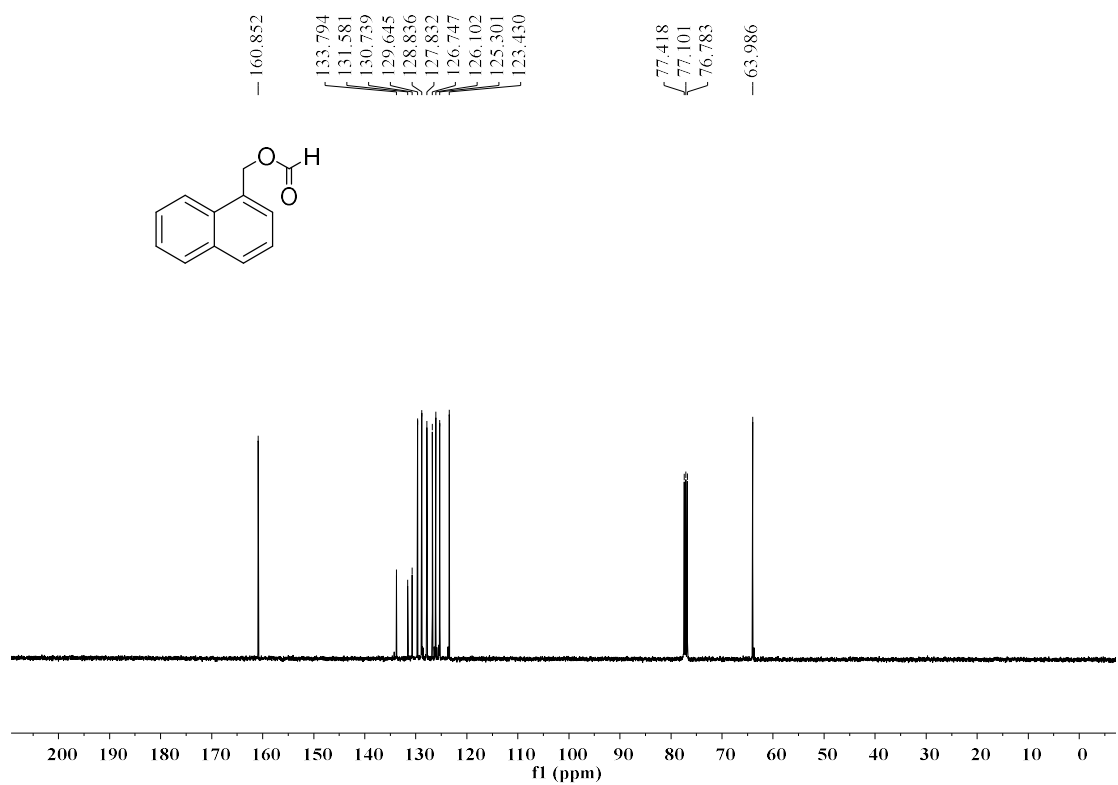

### <sup>1</sup>H NMR (400 MHz, CDCl<sub>3</sub>) spectrum of 2am

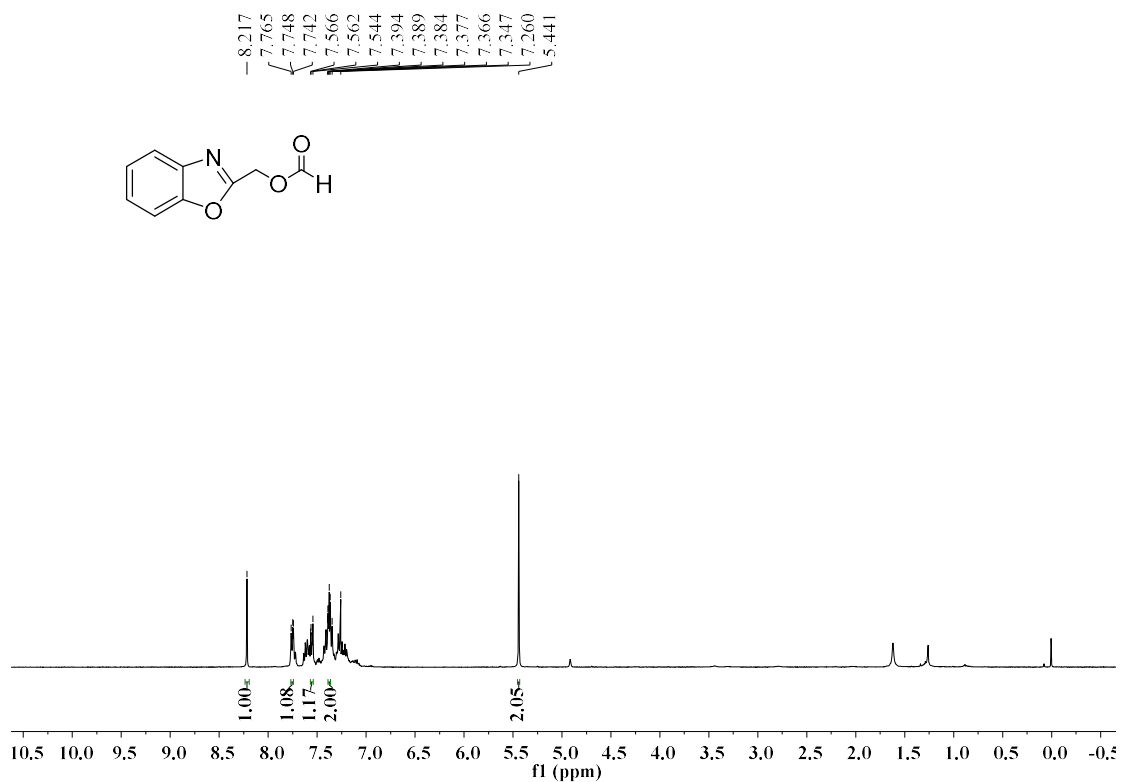

### <sup>13</sup>C NMR (100 MHz, CDCl<sub>3</sub>) spectrum of 2am

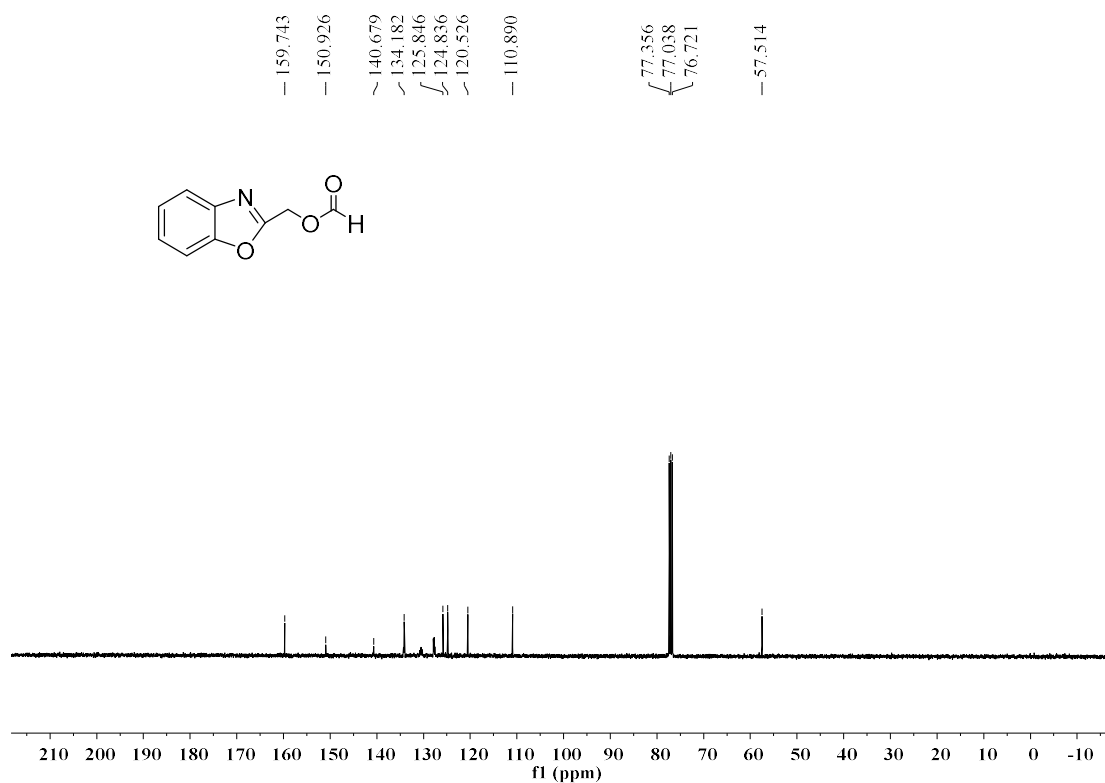

### <sup>1</sup>H NMR (400 MHz, CDCl<sub>3</sub>) spectrum of 2an

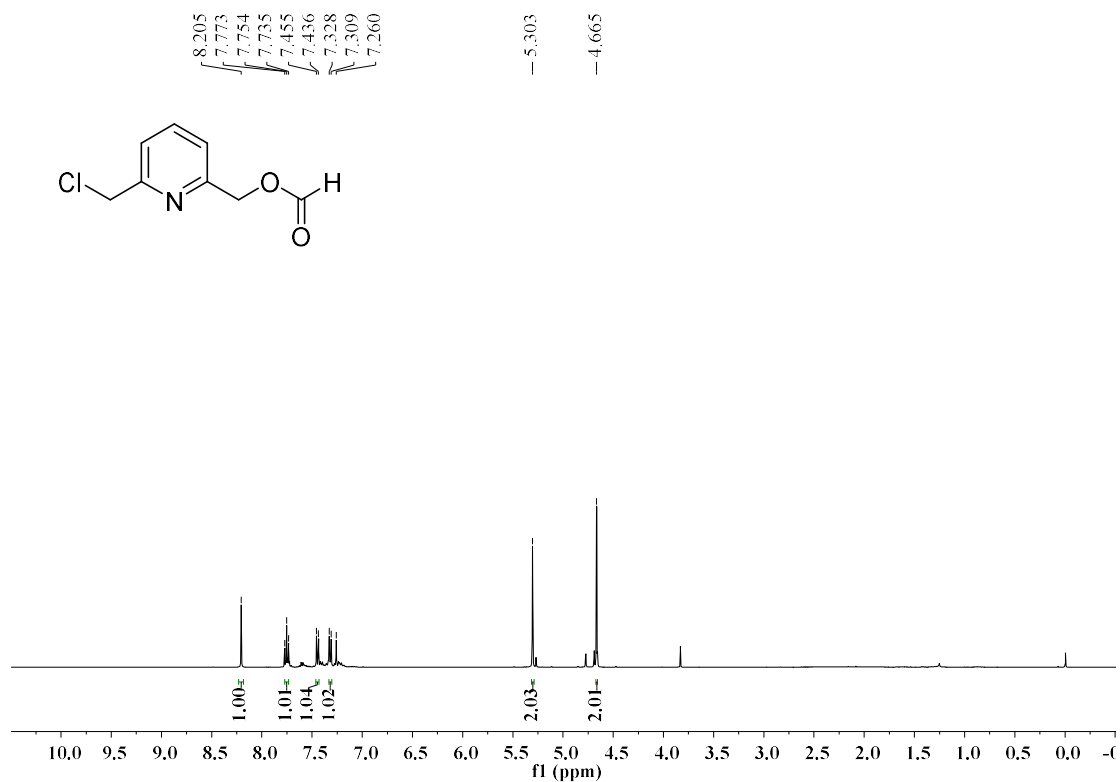

### <sup>13</sup>C NMR (100 MHz, CDCl<sub>3</sub>) spectrum of 2an

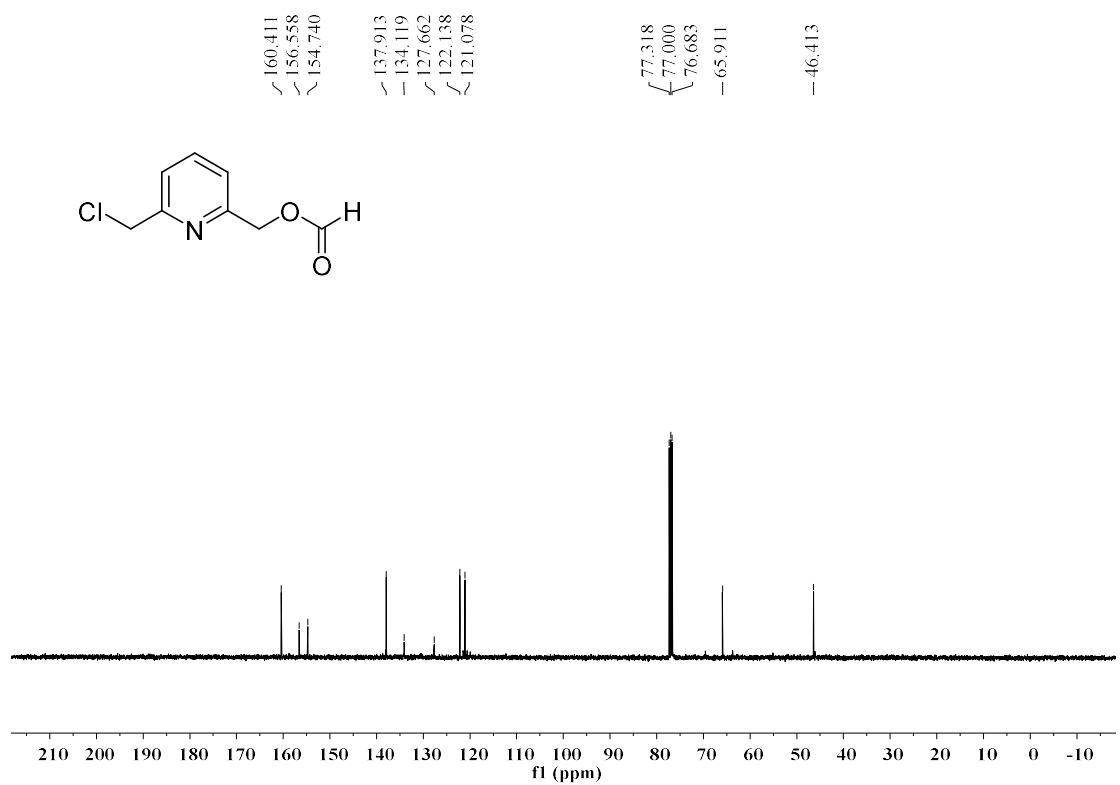

**<sup>1</sup>H NMR (400 MHz, CDCl<sub>3</sub>) spectrum of 2ao**

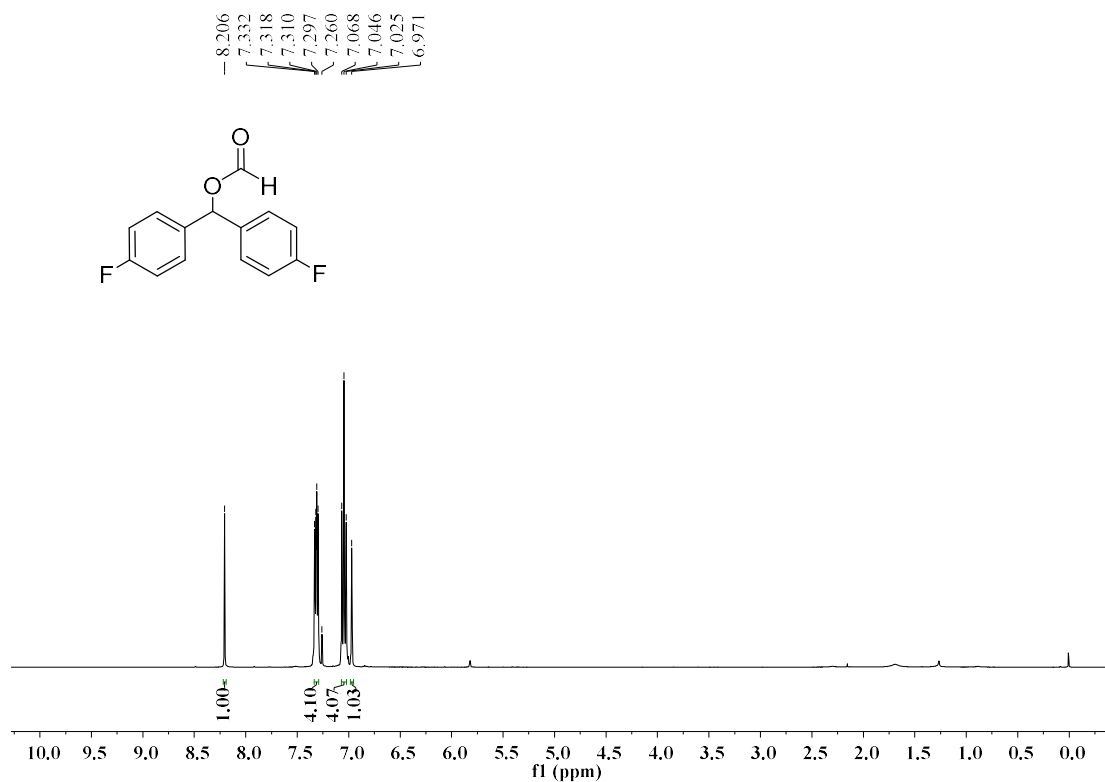

**<sup>13</sup>C NMR (100 MHz, CDCl<sub>3</sub>) spectrum of 2ao**

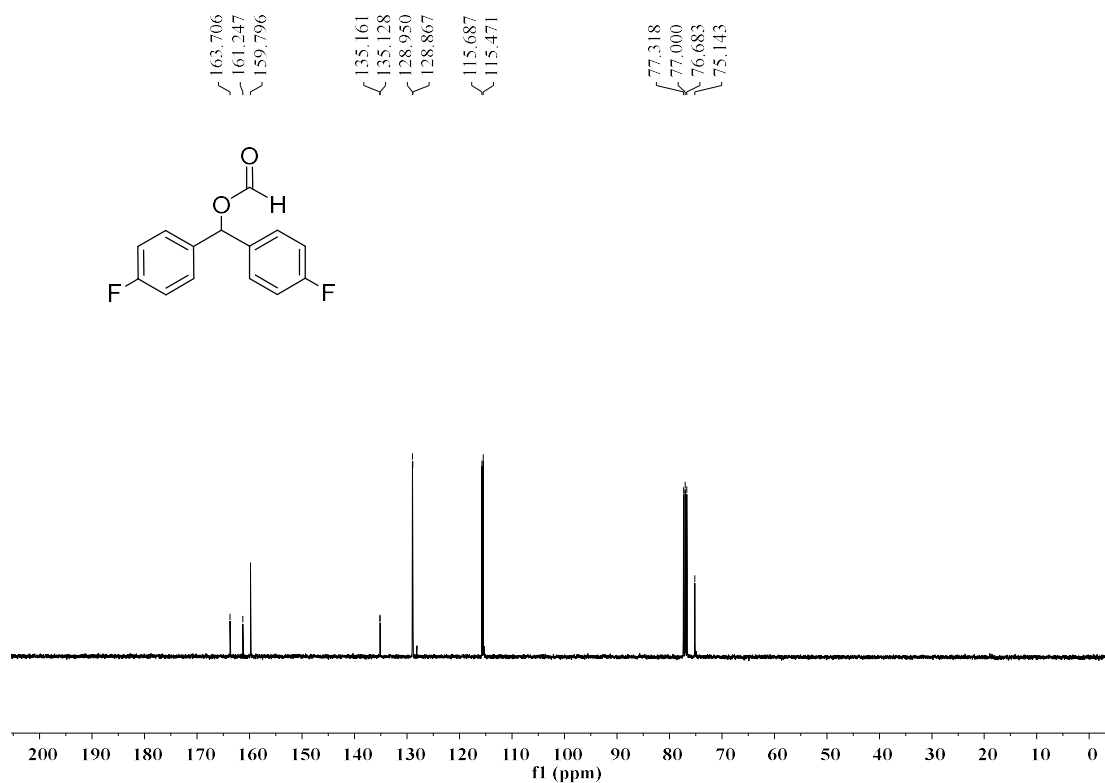

### <sup>1</sup>H NMR (400 MHz, CDCl<sub>3</sub>) spectrum of 3a

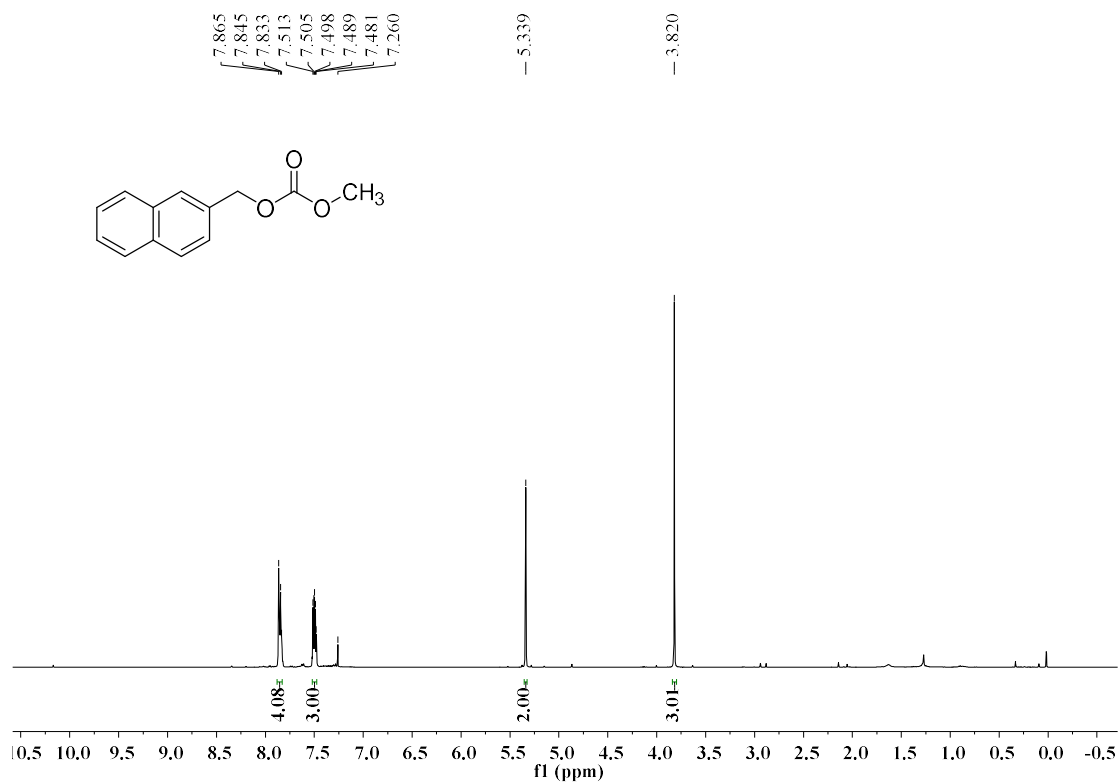

### <sup>13</sup>C NMR (100 MHz, CDCl<sub>3</sub>) spectrum of 3a

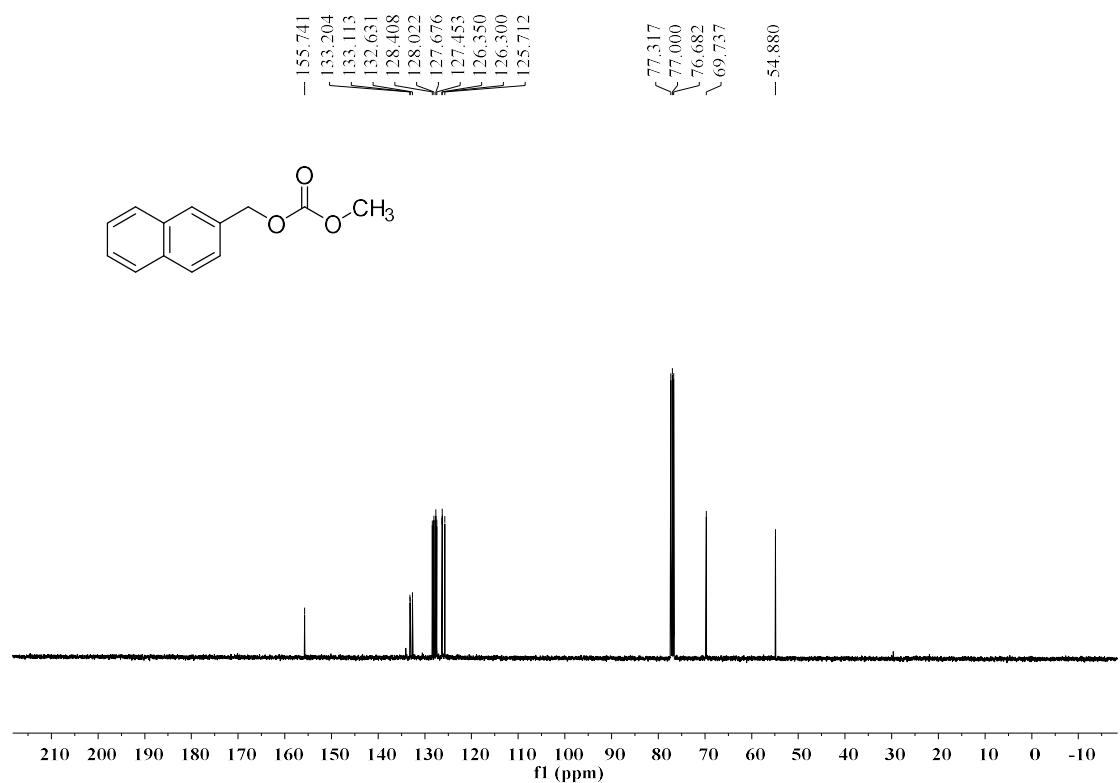

### <sup>1</sup>H NMR (400 MHz, CDCl<sub>3</sub>) spectrum of 3b

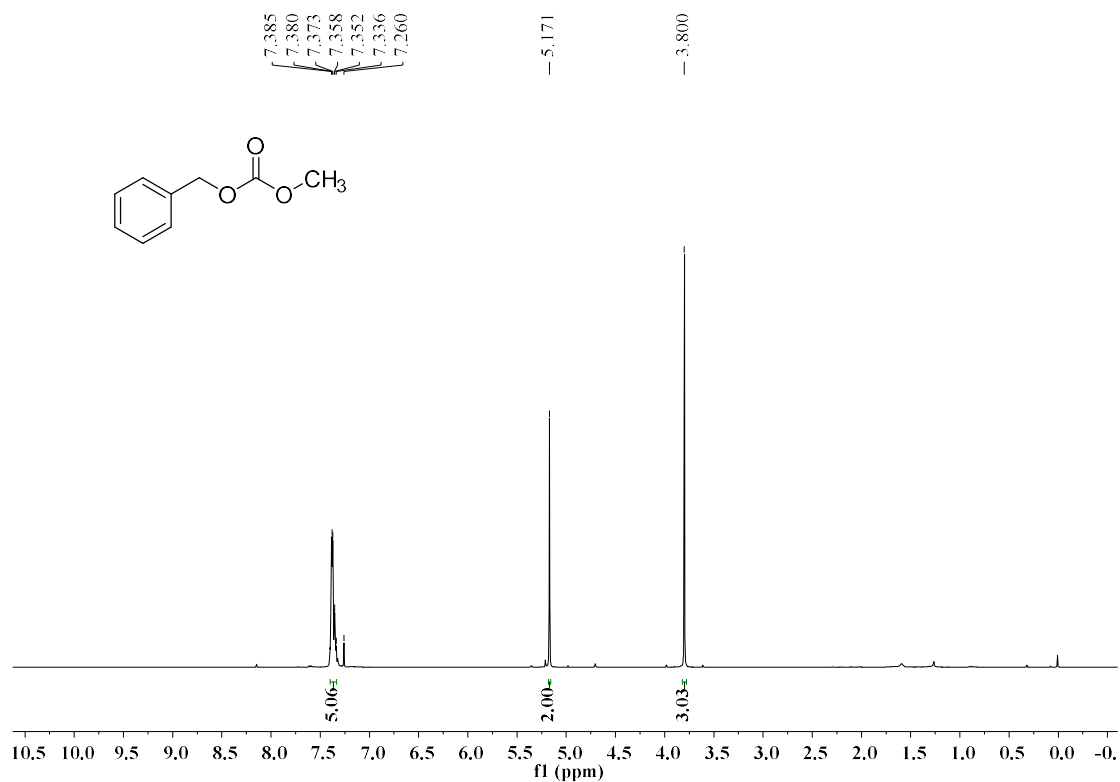

### <sup>13</sup>C NMR (100 MHz, CDCl<sub>3</sub>) spectrum of 3b

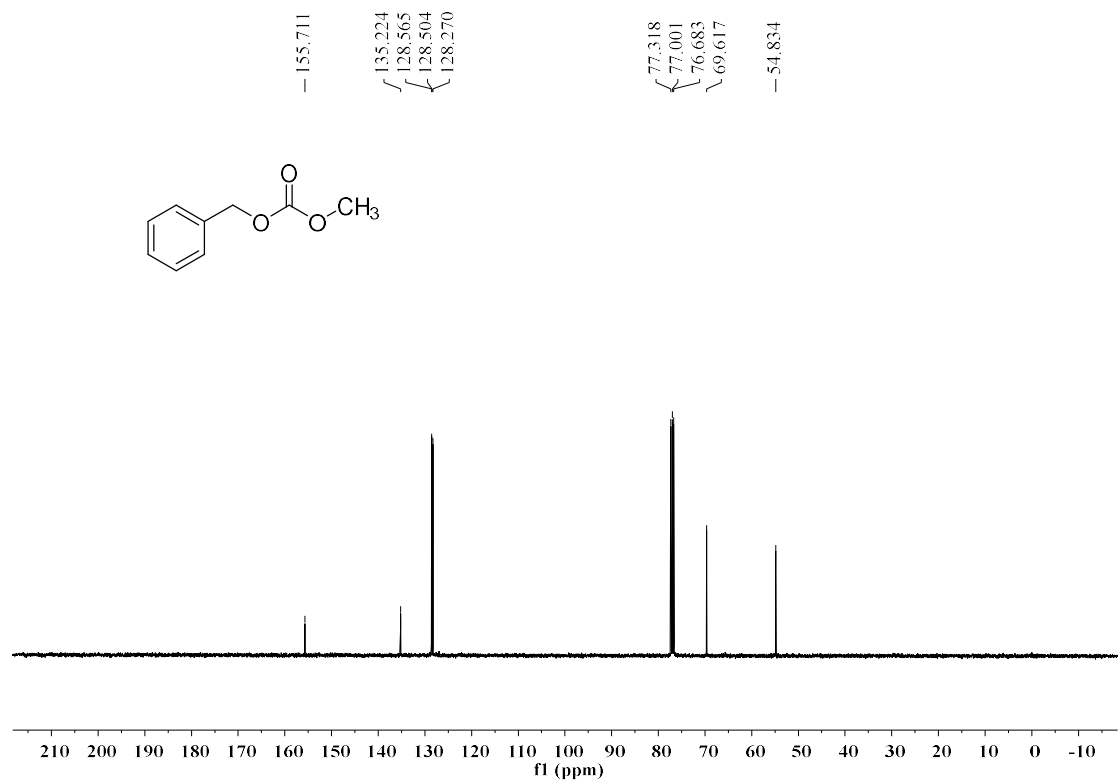

### <sup>1</sup>H NMR (400 MHz, CDCl<sub>3</sub>) spectrum of 3c

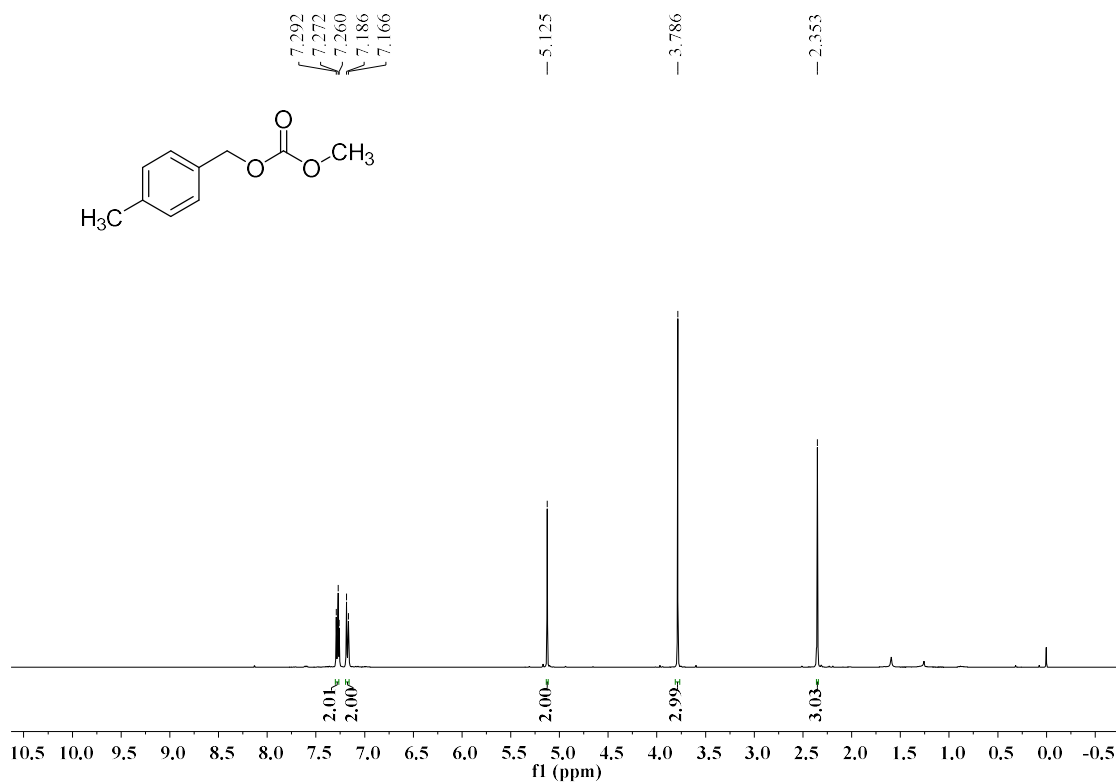

### <sup>13</sup>C NMR (100 MHz, CDCl<sub>3</sub>) spectrum of 3c

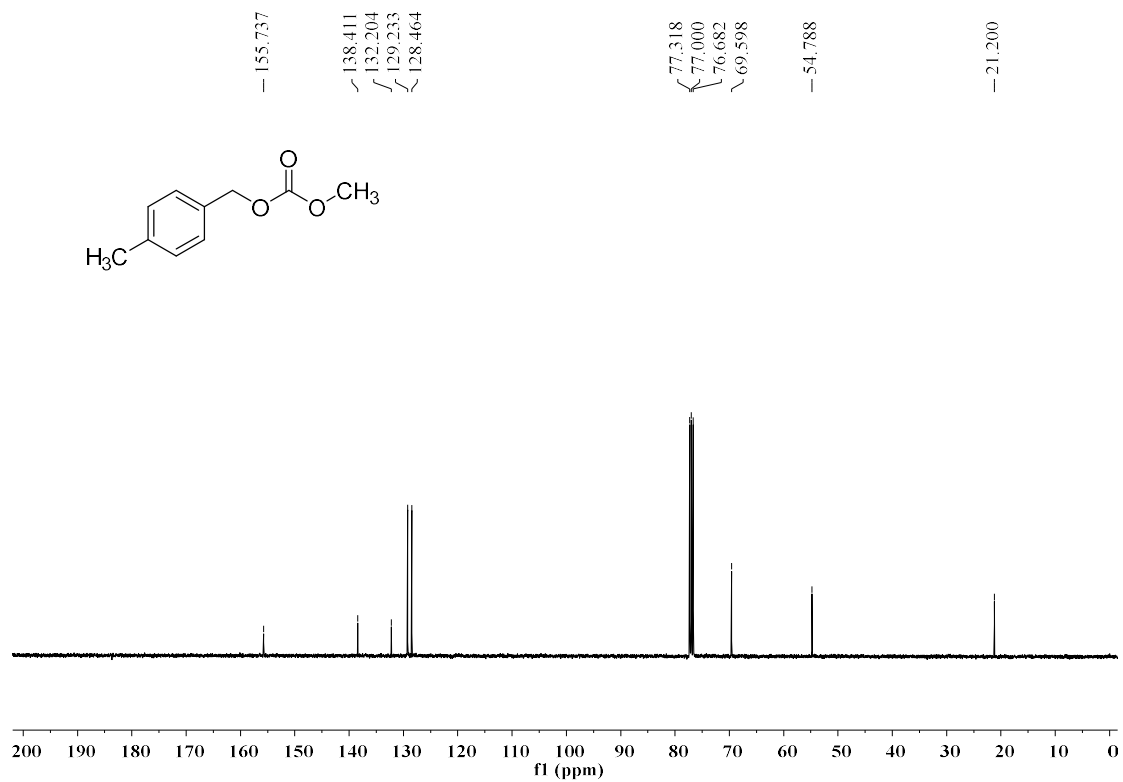

### <sup>1</sup>H NMR (400 MHz, CDCl<sub>3</sub>) spectrum of 3d

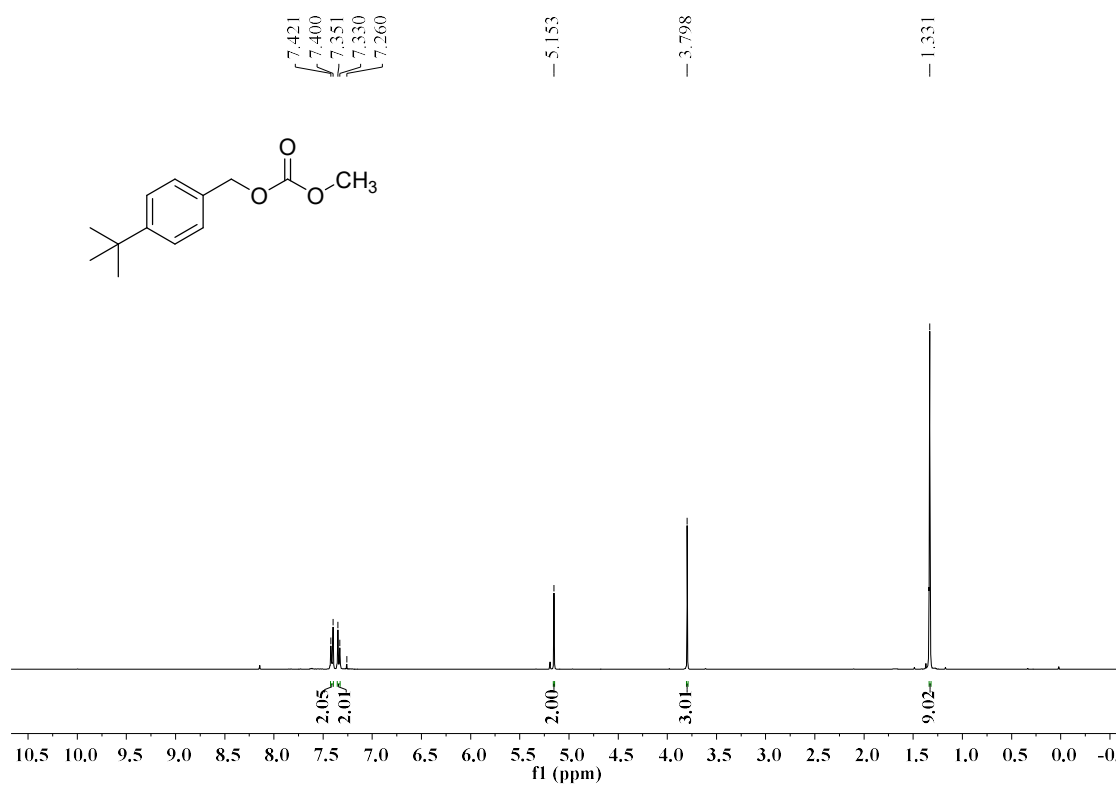

### <sup>13</sup>C NMR (100 MHz, CDCl<sub>3</sub>) spectrum of 3d

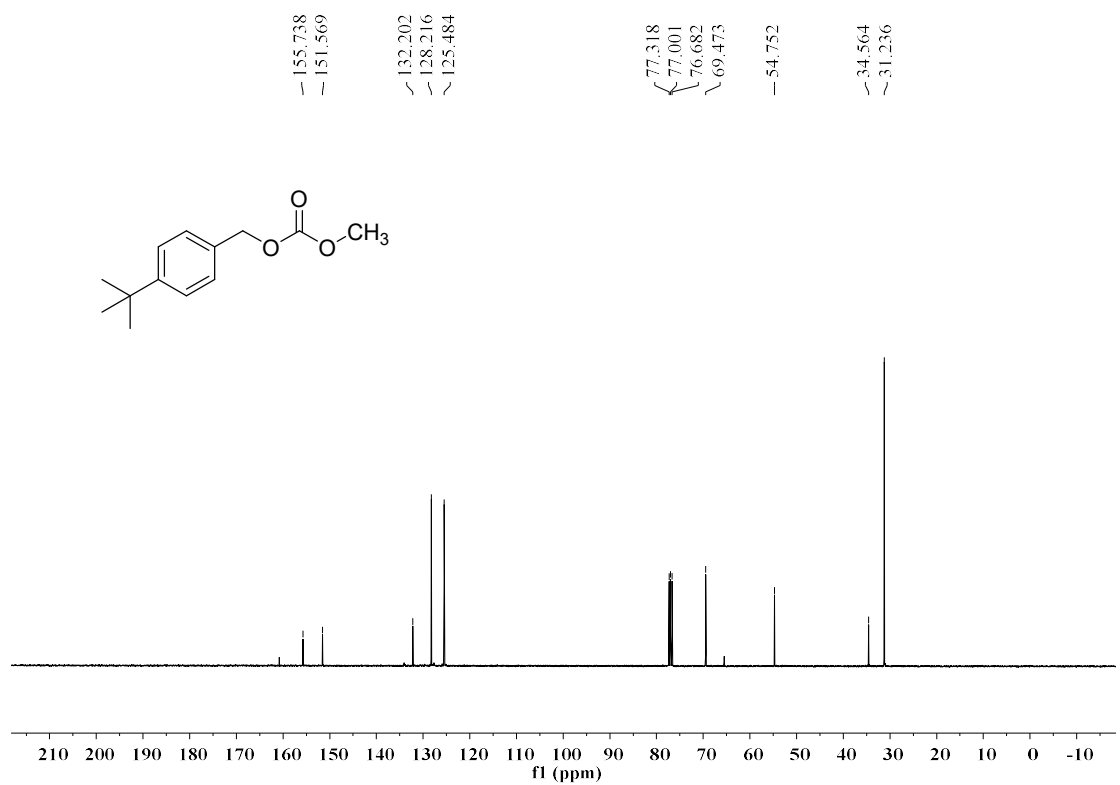

### <sup>1</sup>H NMR (400 MHz, CDCl<sub>3</sub>) spectrum of 3e

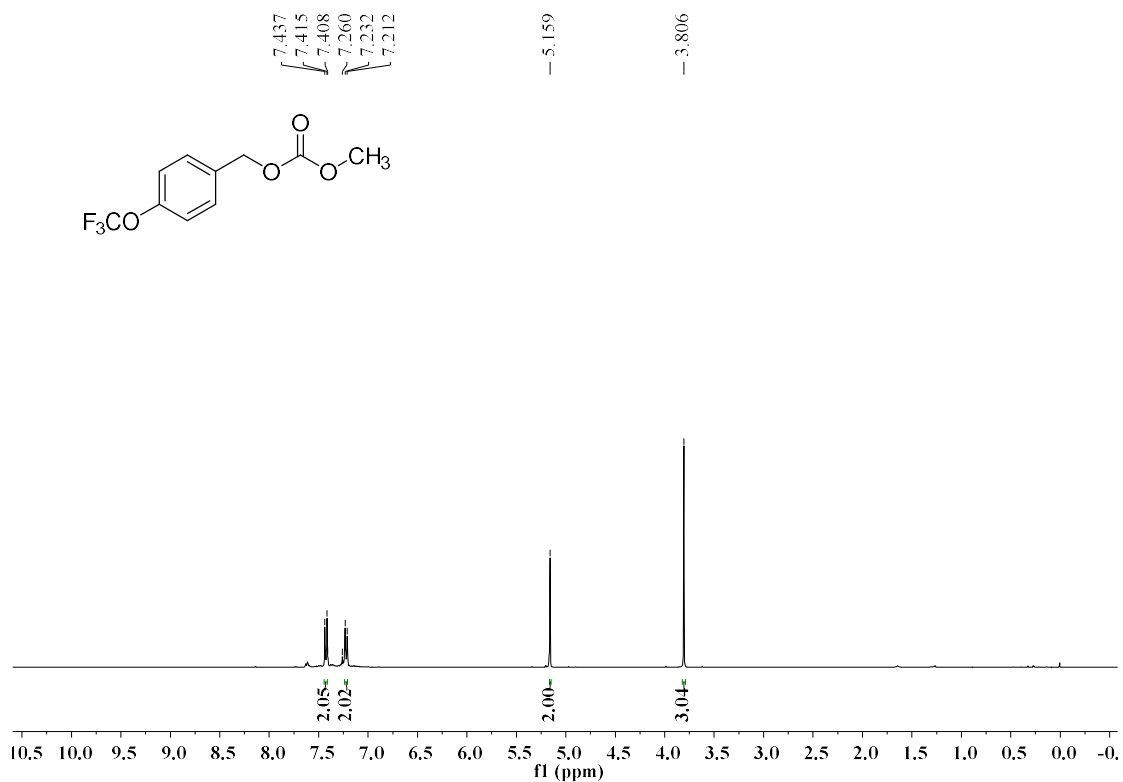

### <sup>13</sup>C NMR (100 MHz, CDCl<sub>3</sub>) spectrum of 3e

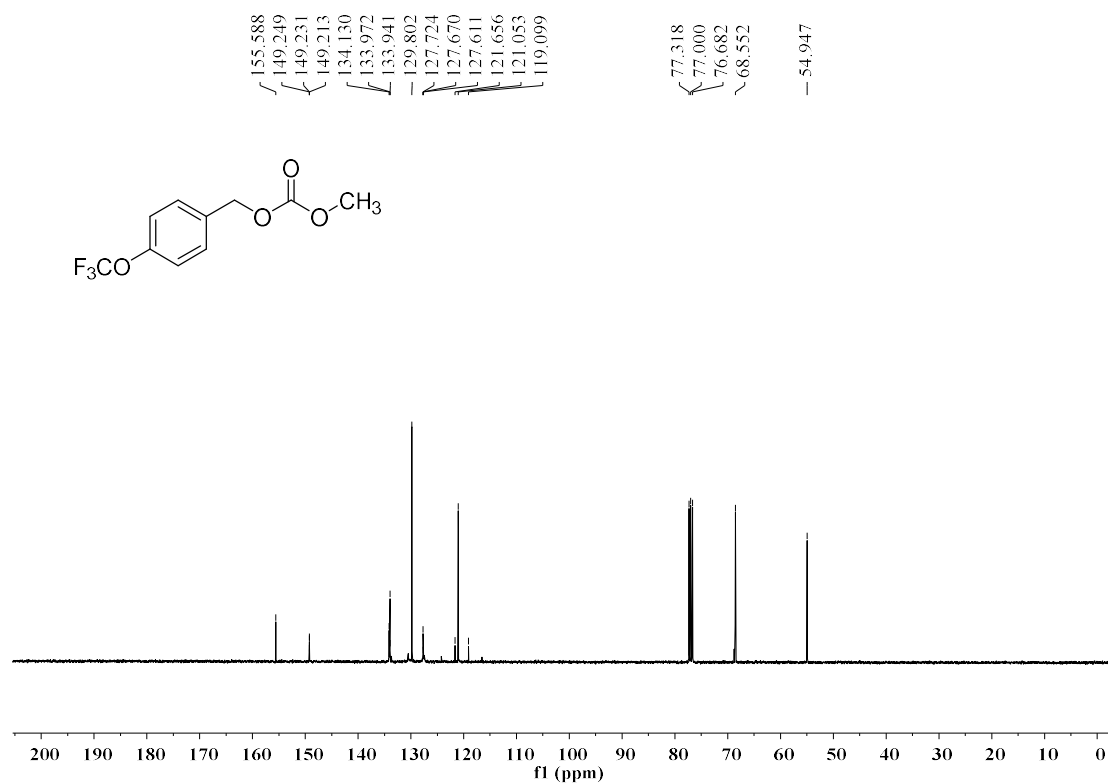

### <sup>1</sup>H NMR (400 MHz, CDCl<sub>3</sub>) spectrum of 3f

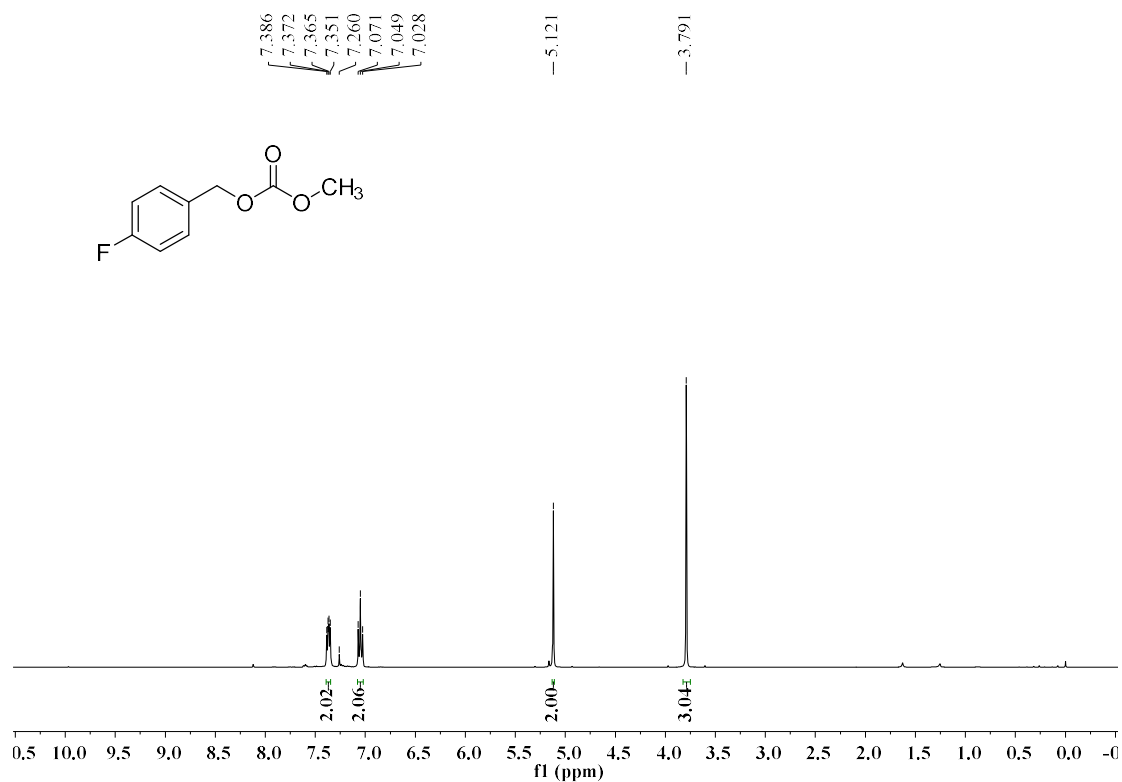

### <sup>13</sup>C NMR (100 MHz, CDCl<sub>3</sub>) spectrum of 3f

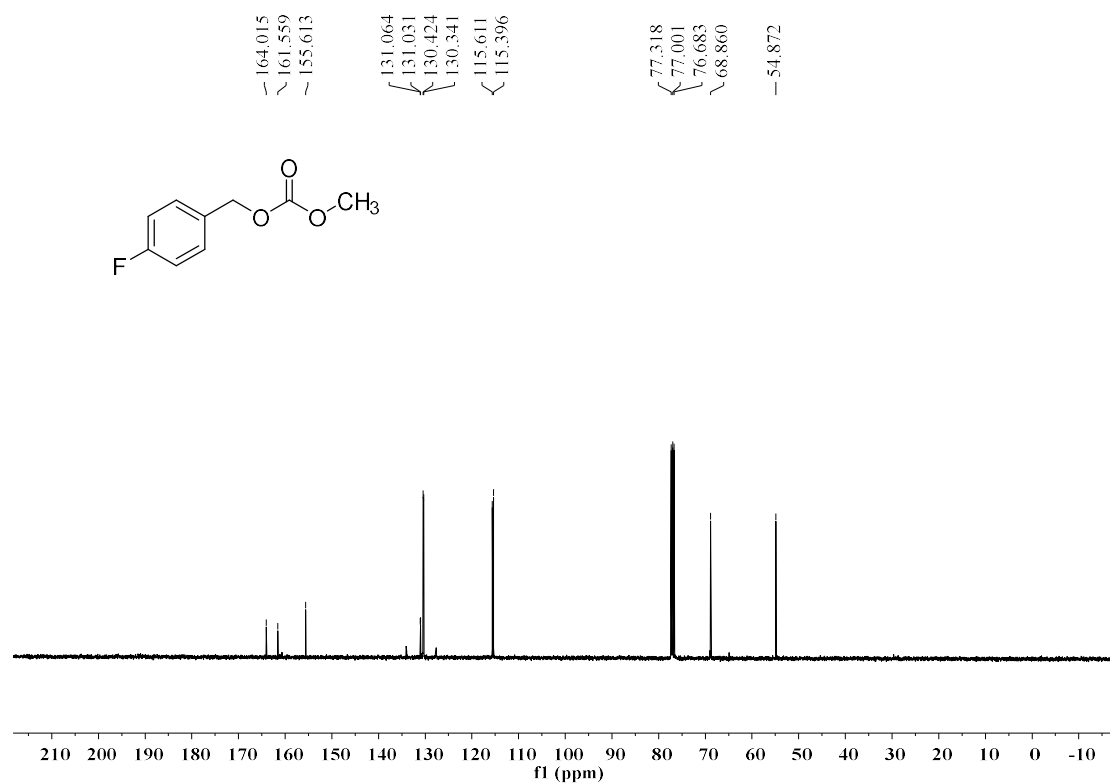

### <sup>1</sup>H NMR (400 MHz, CDCl<sub>3</sub>) spectrum of 3g

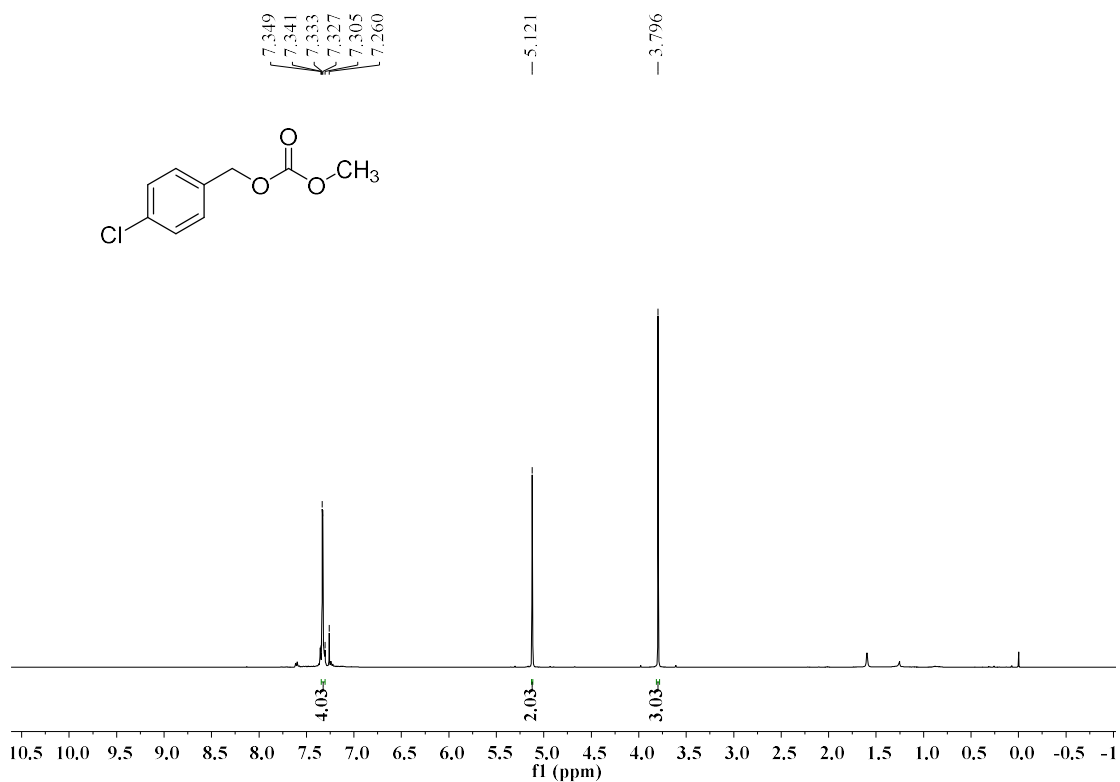

### <sup>13</sup>C NMR (100 MHz, CDCl<sub>3</sub>) spectrum of 3g

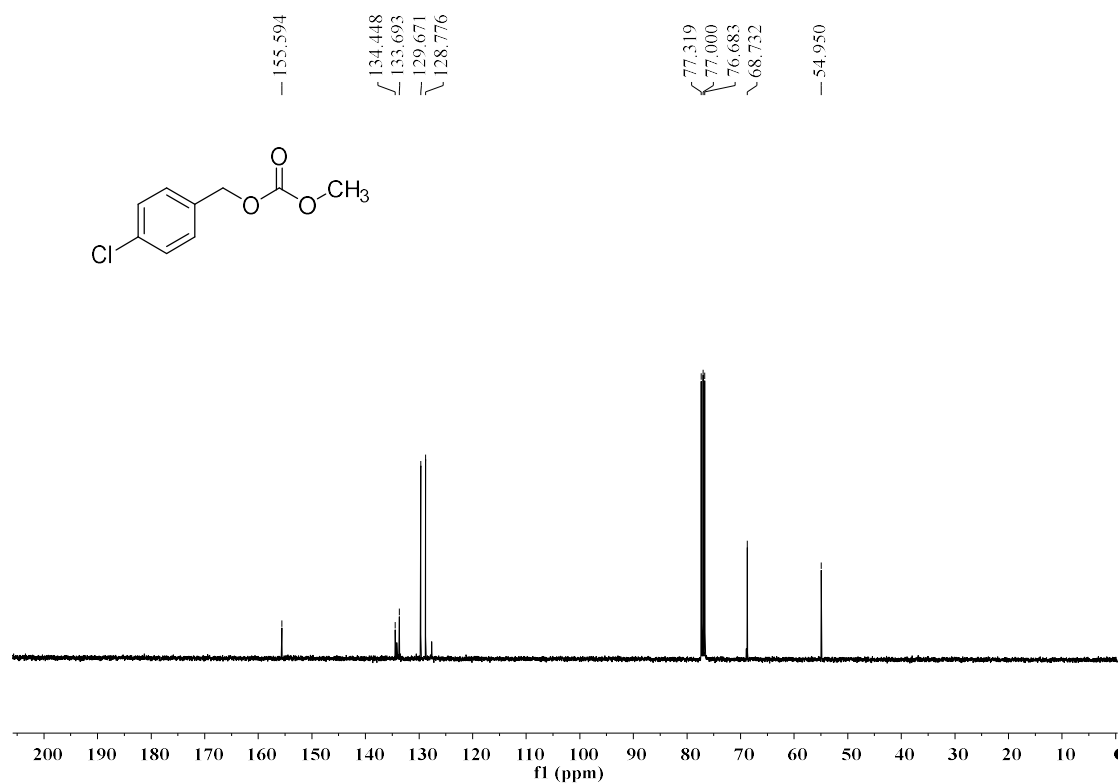

### <sup>1</sup>H NMR (400 MHz, CDCl<sub>3</sub>) spectrum of 3h

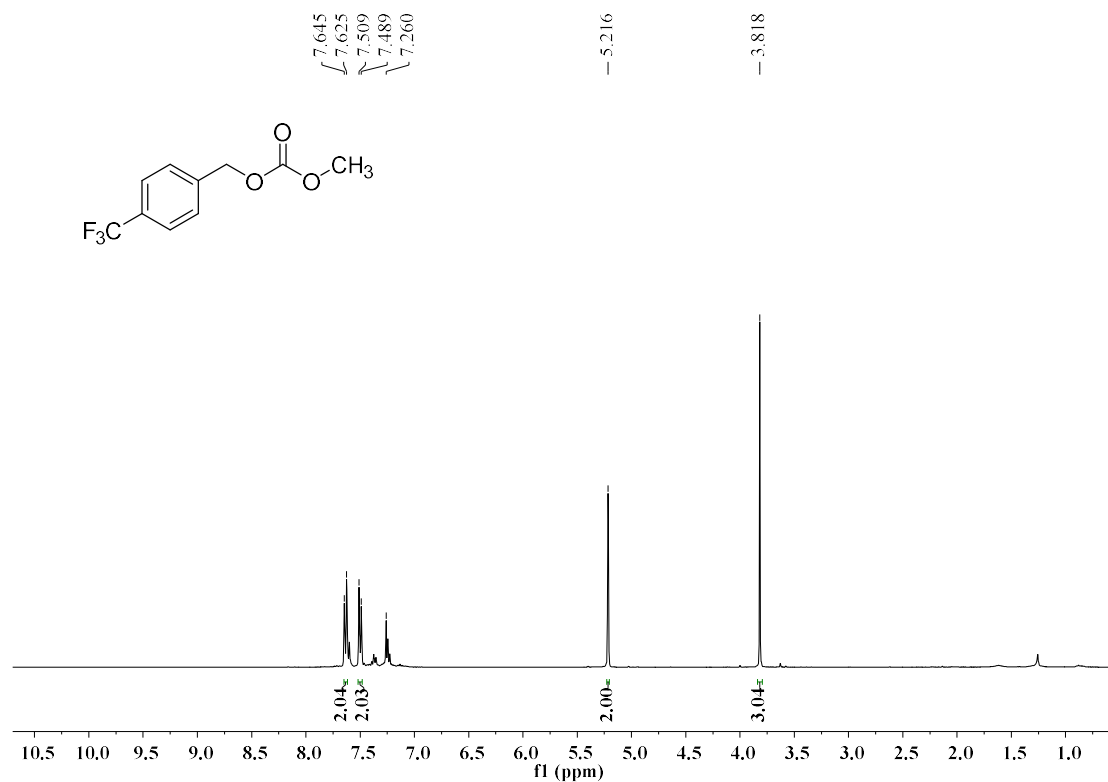

### <sup>13</sup>C NMR (100 MHz, CDCl<sub>3</sub>) spectrum of 3h

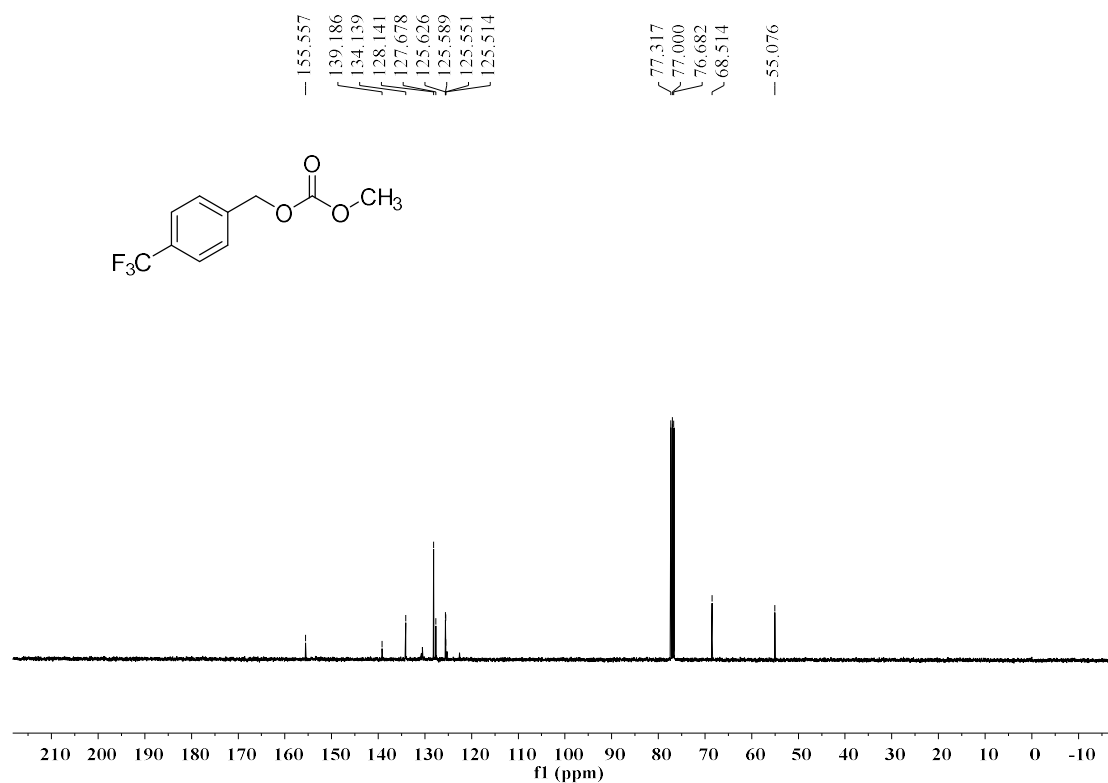

### <sup>1</sup>H NMR (400 MHz, CDCl<sub>3</sub>) spectrum of 3i

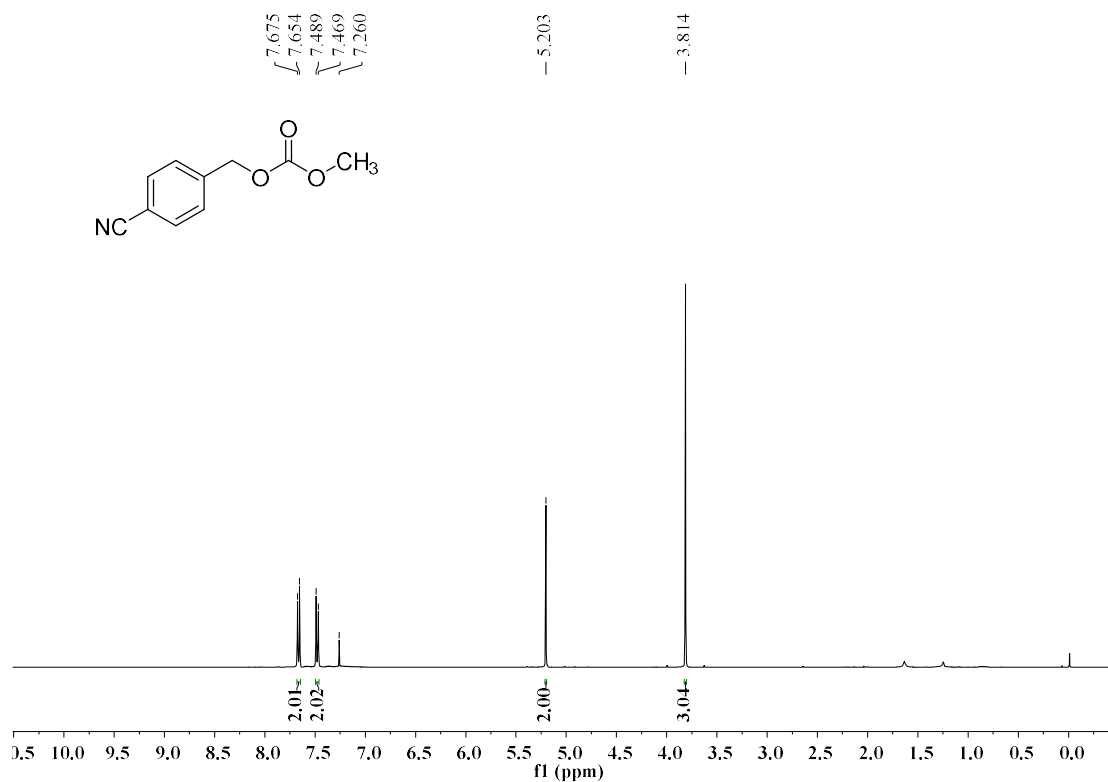

### <sup>13</sup>C NMR (100 MHz, CDCl<sub>3</sub>) spectrum of 3i

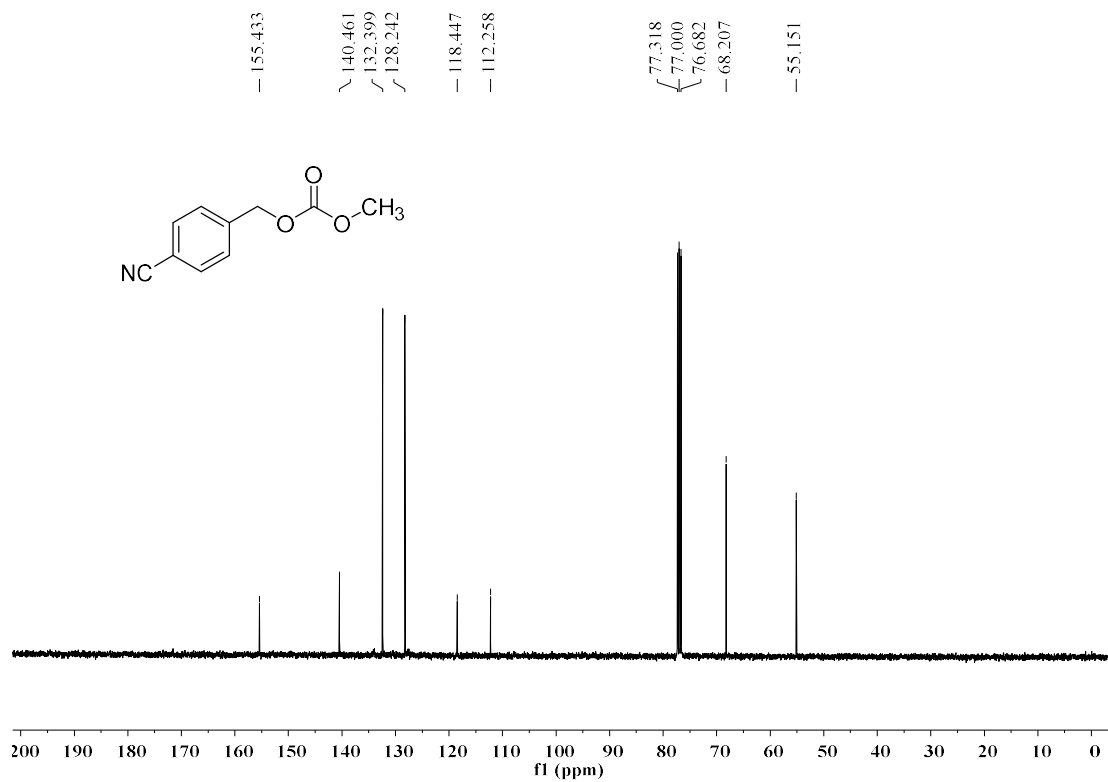

### <sup>1</sup>H NMR (400 MHz, CDCl<sub>3</sub>) spectrum of 3j

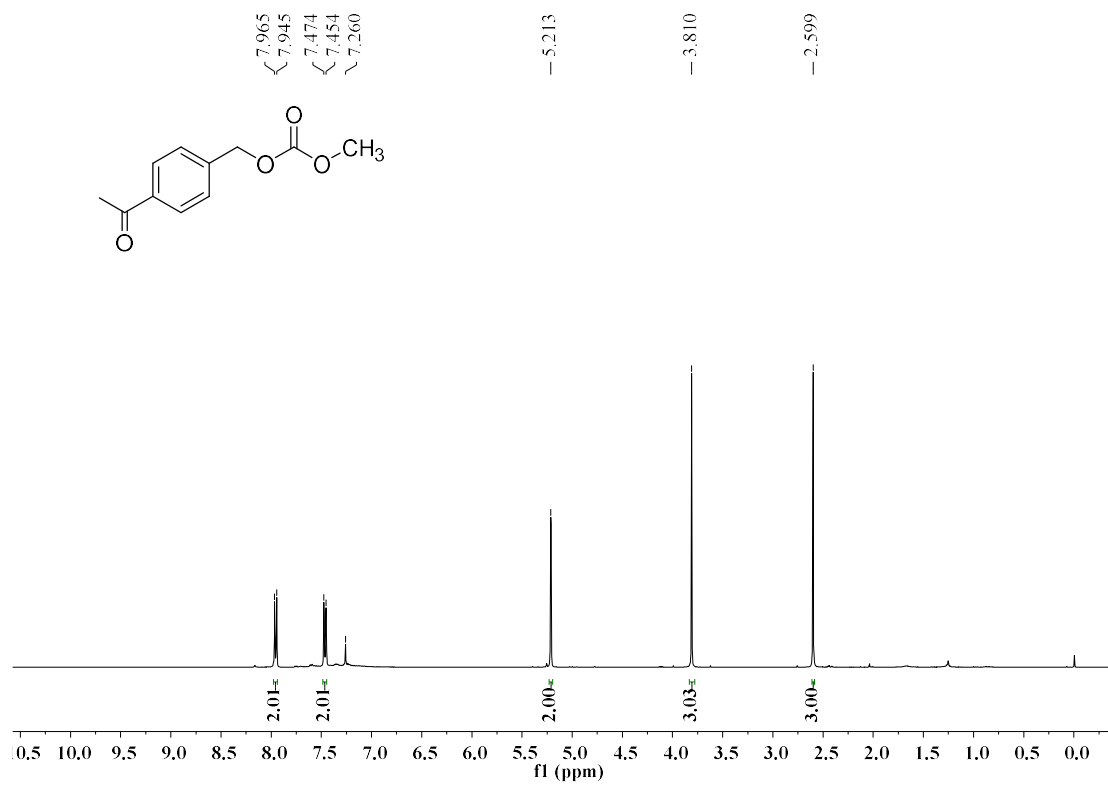

### <sup>13</sup>C NMR (100 MHz, CDCl<sub>3</sub>) spectrum of 3j

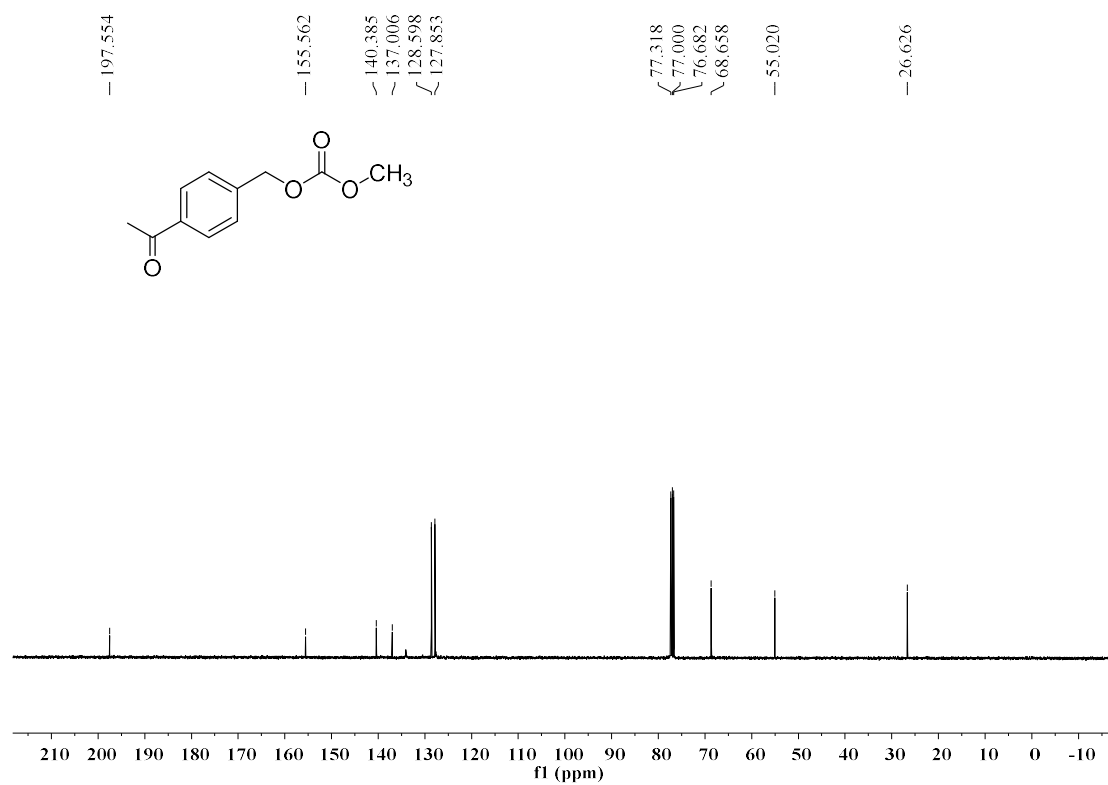

### <sup>1</sup>H NMR (400 MHz, CDCl<sub>3</sub>) spectrum of 3k

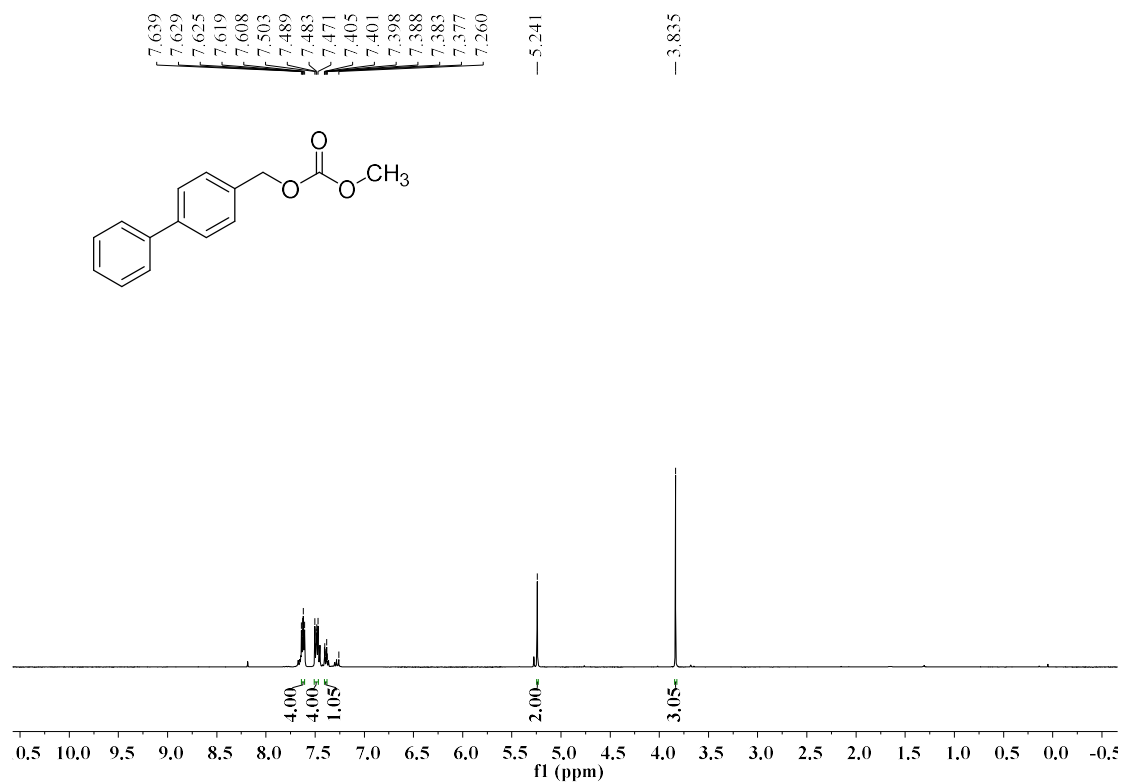

### <sup>13</sup>C NMR (100 MHz, CDCl<sub>3</sub>) spectrum of 3k

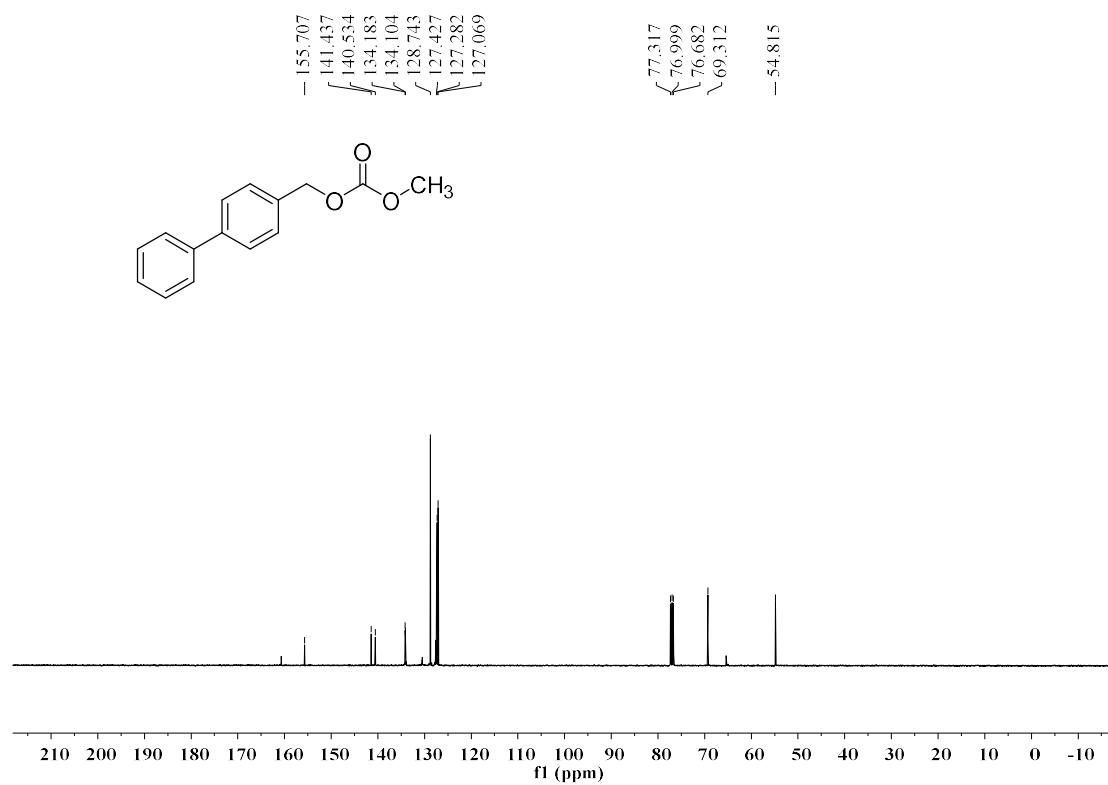

**<sup>1</sup>H NMR (400 MHz, CDCl<sub>3</sub>) spectrum of 31**

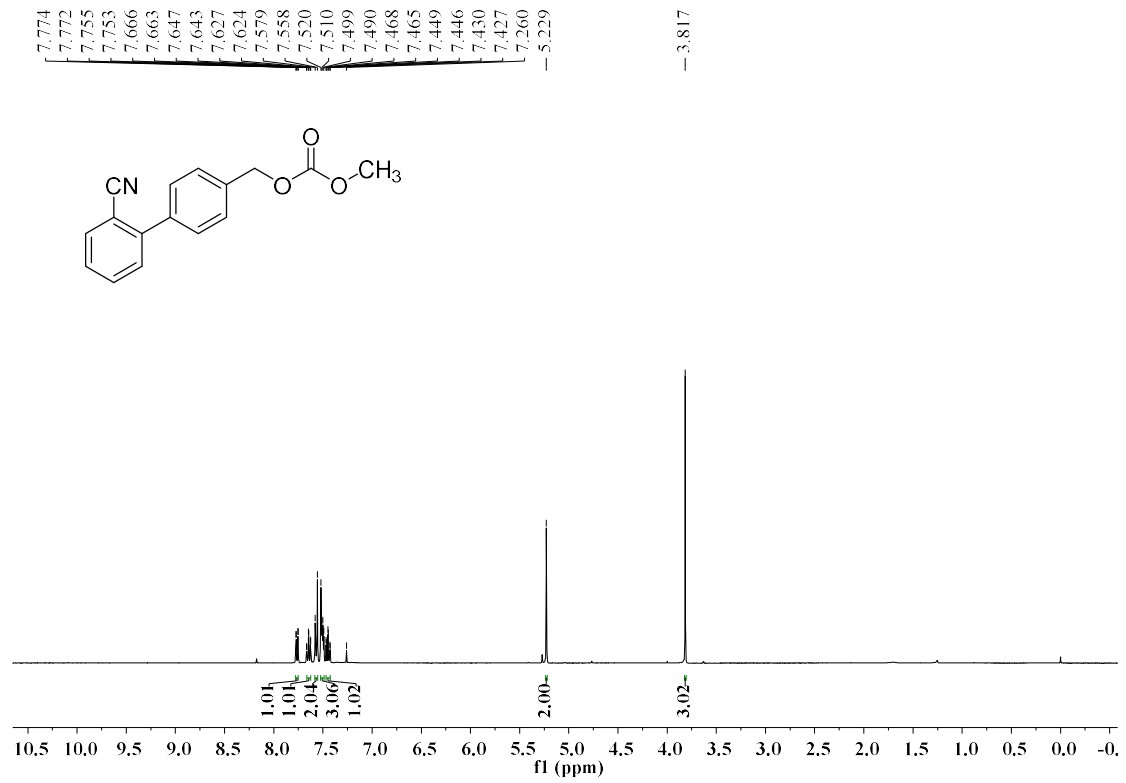

**<sup>13</sup>C NMR (100 MHz, CDCl<sub>3</sub>) spectrum of 31**

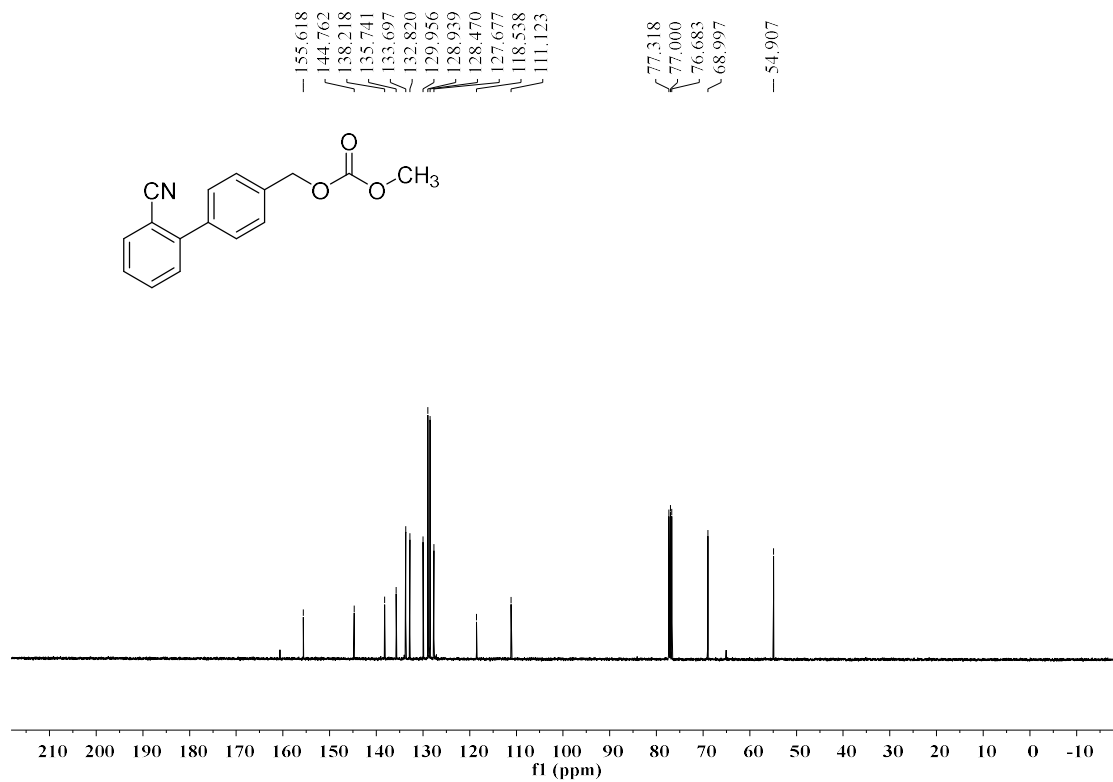

### <sup>1</sup>H NMR (400 MHz, CDCl<sub>3</sub>) spectrum of 3m

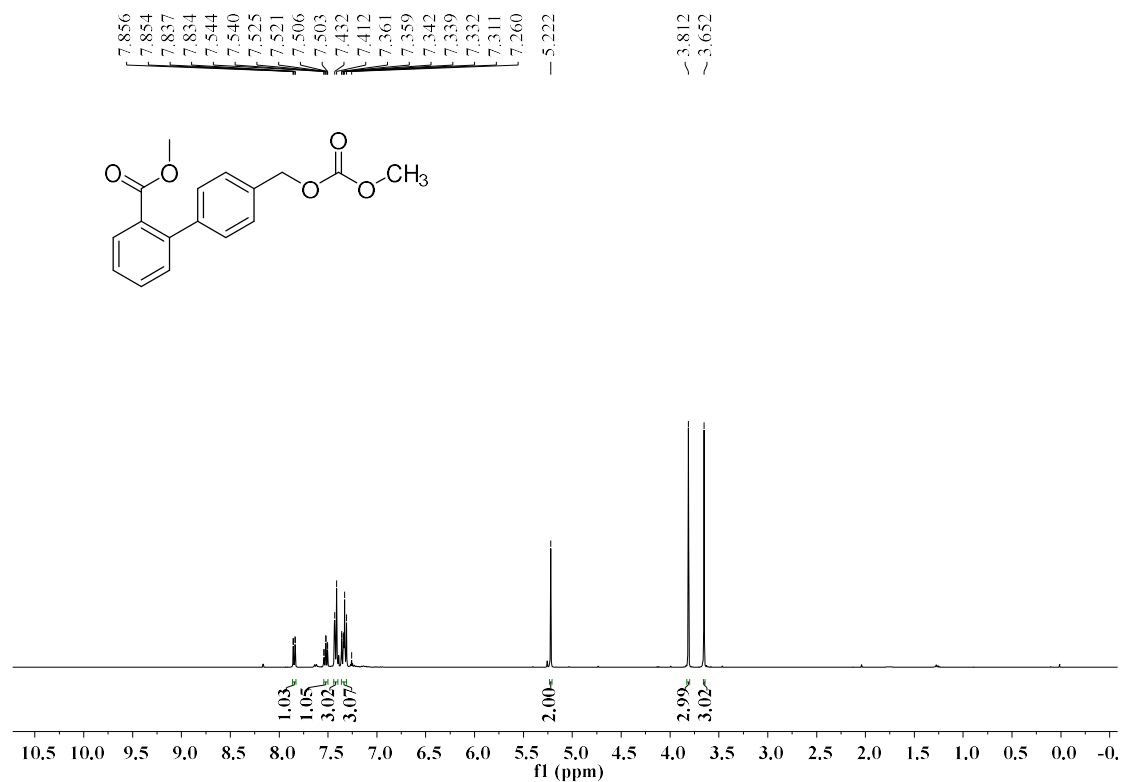

### <sup>13</sup>C NMR (100 MHz, CDCl<sub>3</sub>) spectrum of 3m

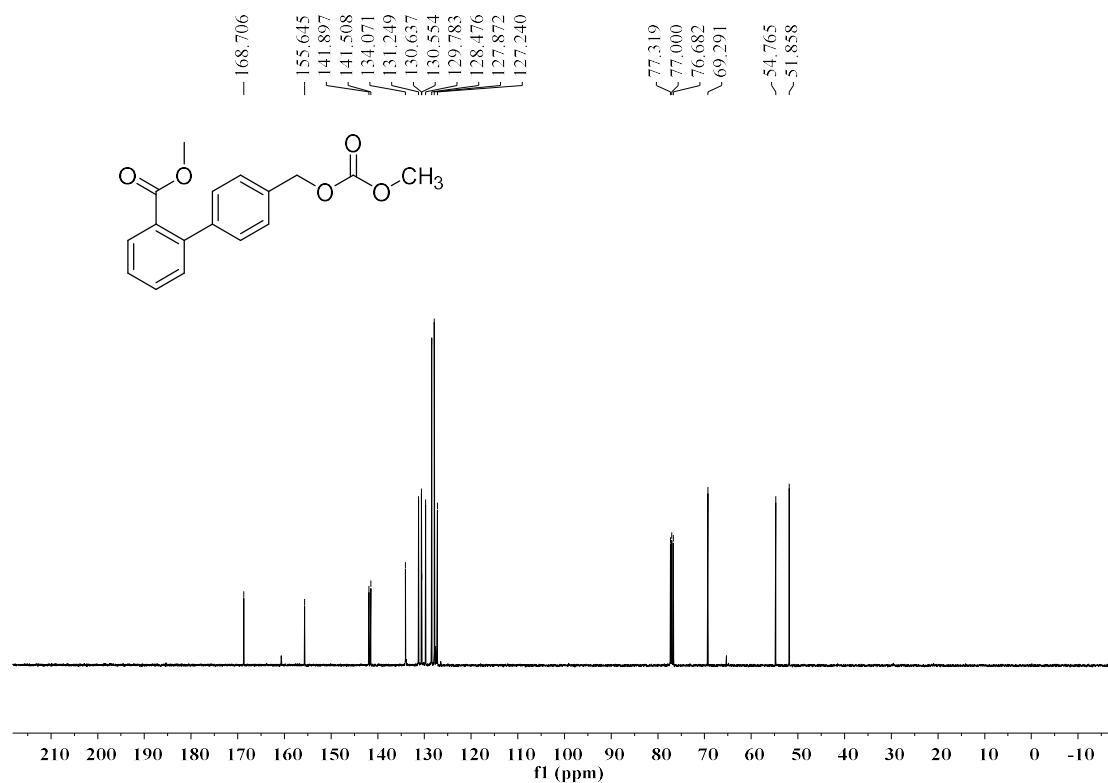

### <sup>1</sup>H NMR (400 MHz, CDCl<sub>3</sub>) spectrum of 3n

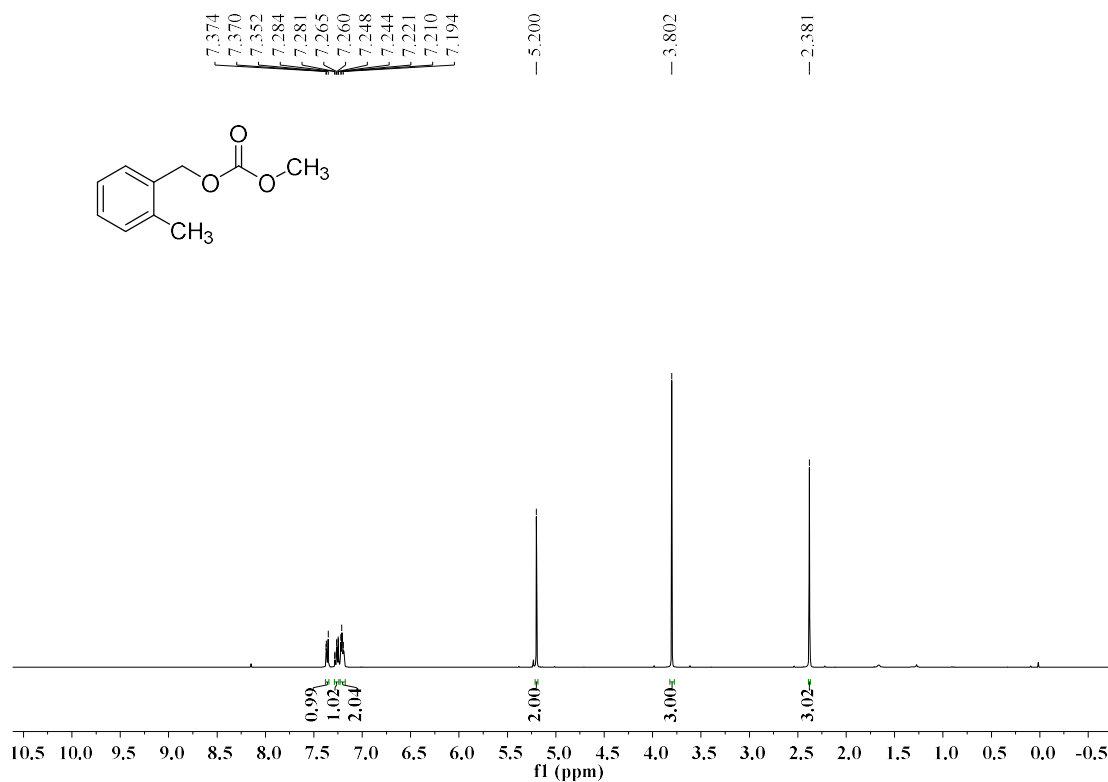

### <sup>13</sup>C NMR (100 MHz, CDCl<sub>3</sub>) spectrum of 3n

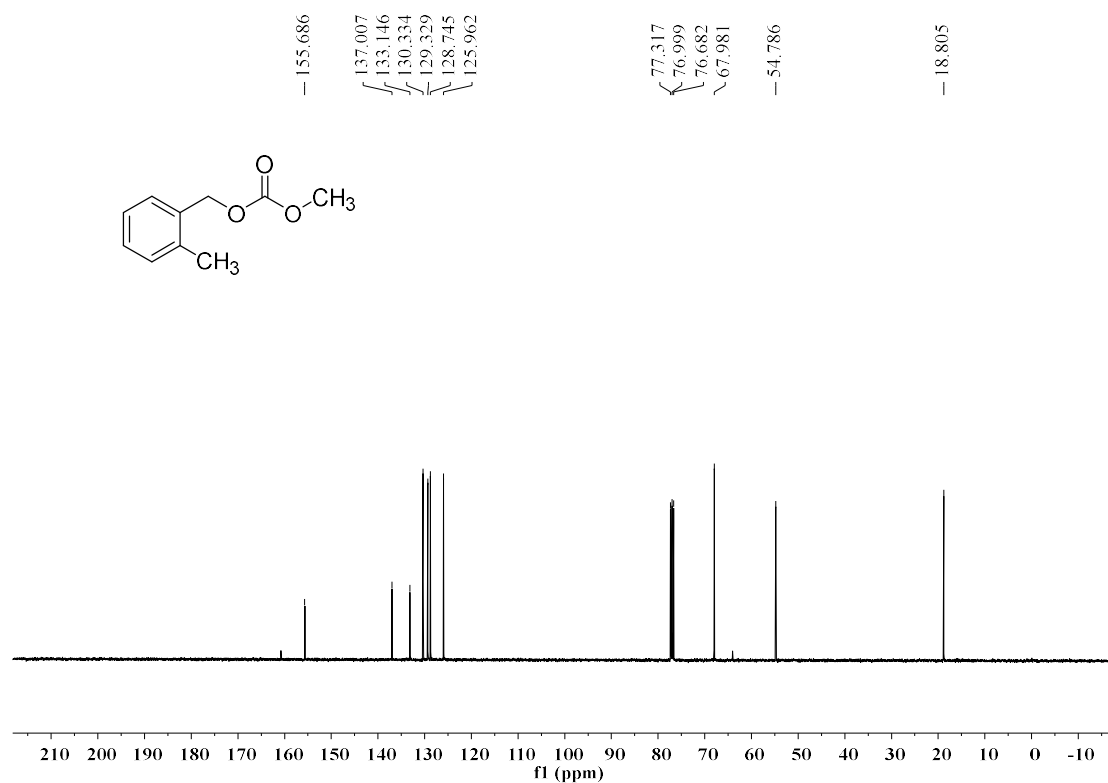

### <sup>1</sup>H NMR (400 MHz, CDCl<sub>3</sub>) spectrum of 3o

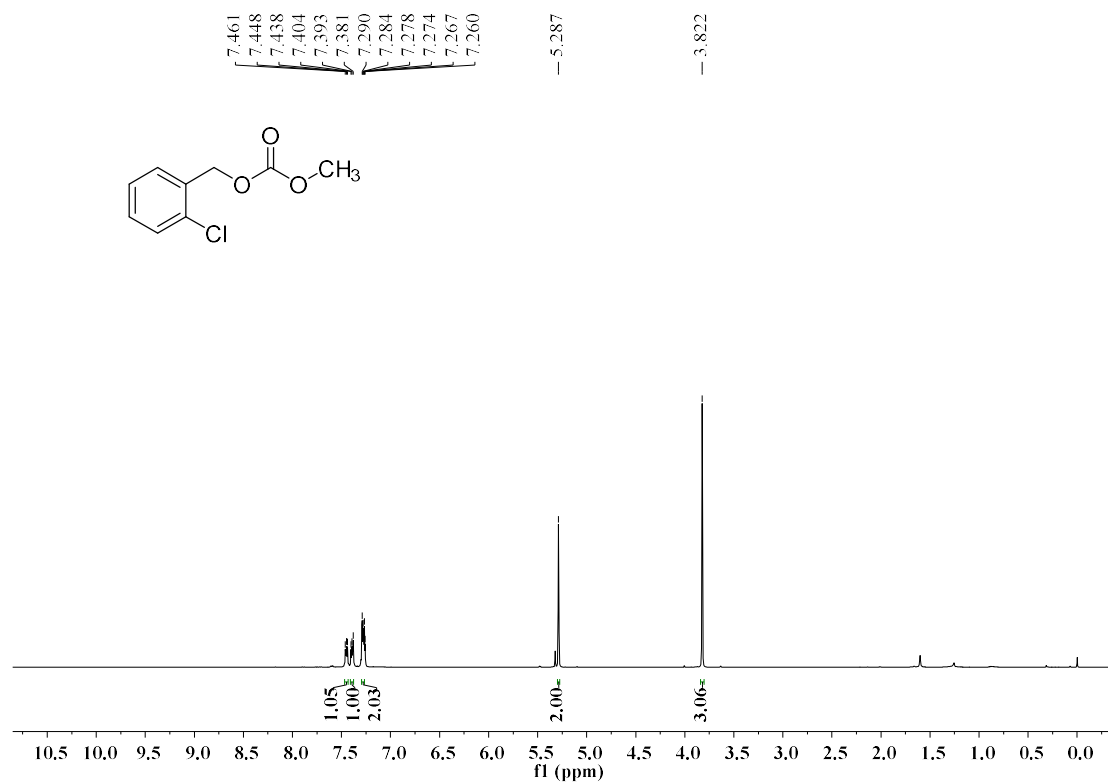

### <sup>13</sup>C NMR (100 MHz, CDCl<sub>3</sub>) spectrum of 3o

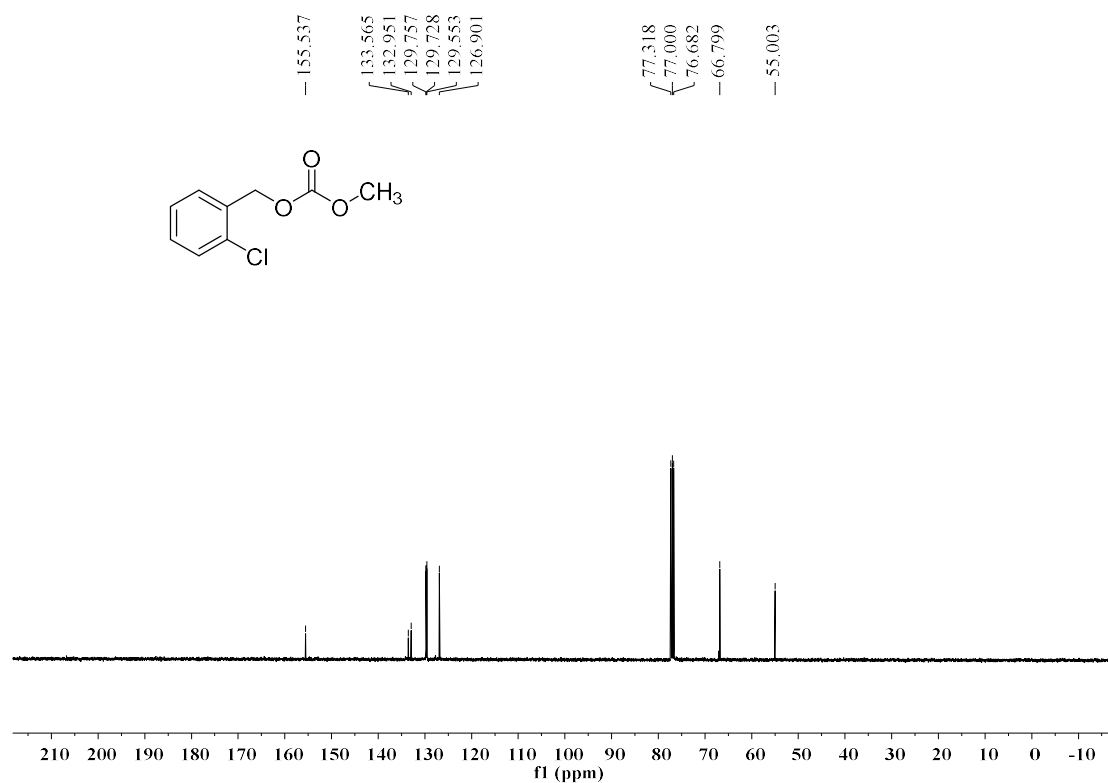

### <sup>1</sup>H NMR (400 MHz, CDCl<sub>3</sub>) spectrum of 3p

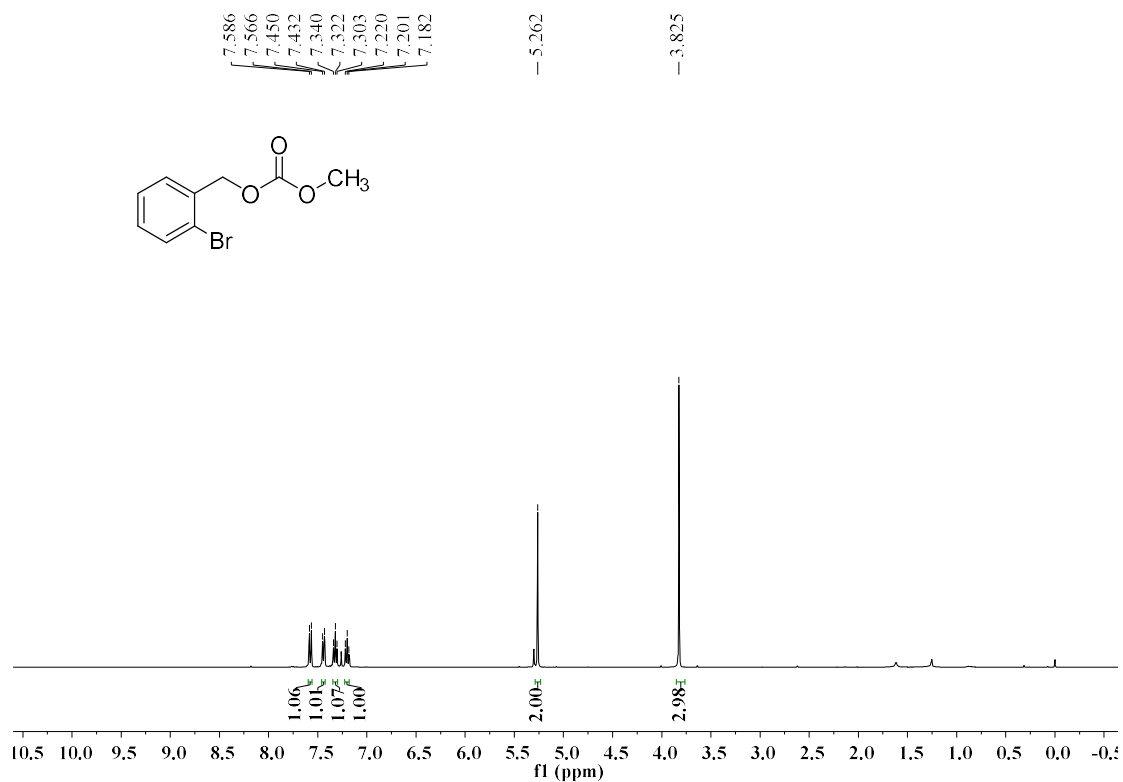

### <sup>13</sup>C NMR (100 MHz, CDCl<sub>3</sub>) spectrum of 3p

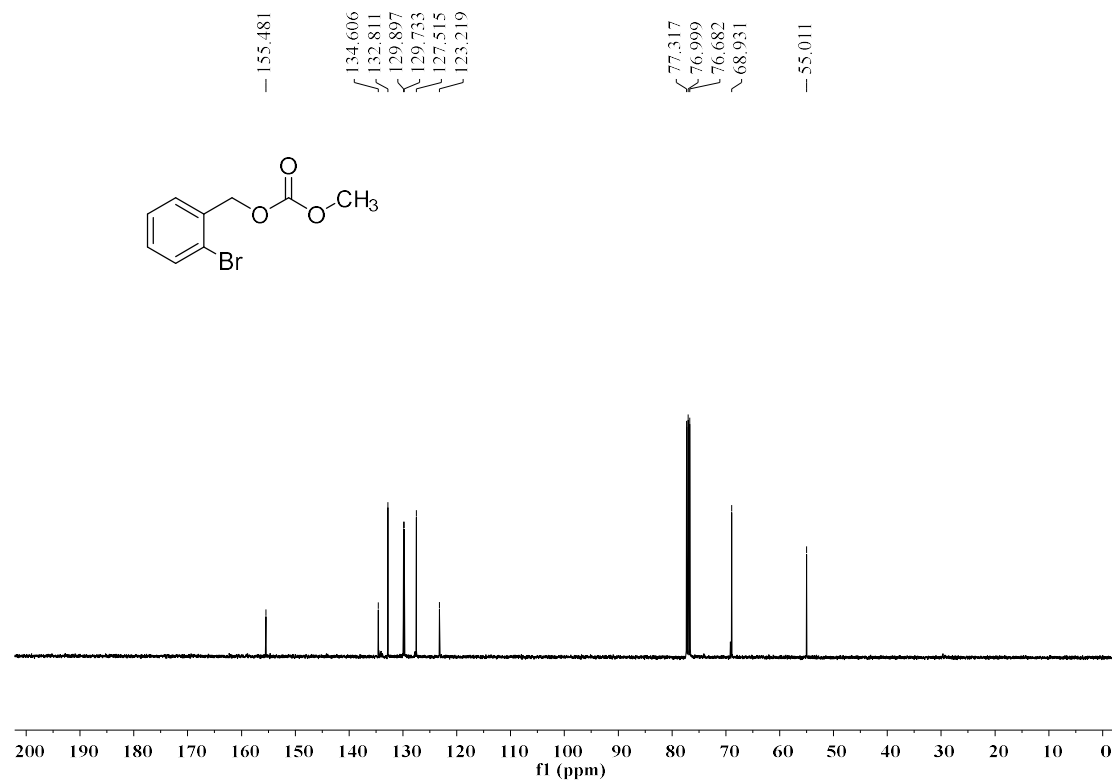

### <sup>1</sup>H NMR (400 MHz, CDCl<sub>3</sub>) spectrum of 3q

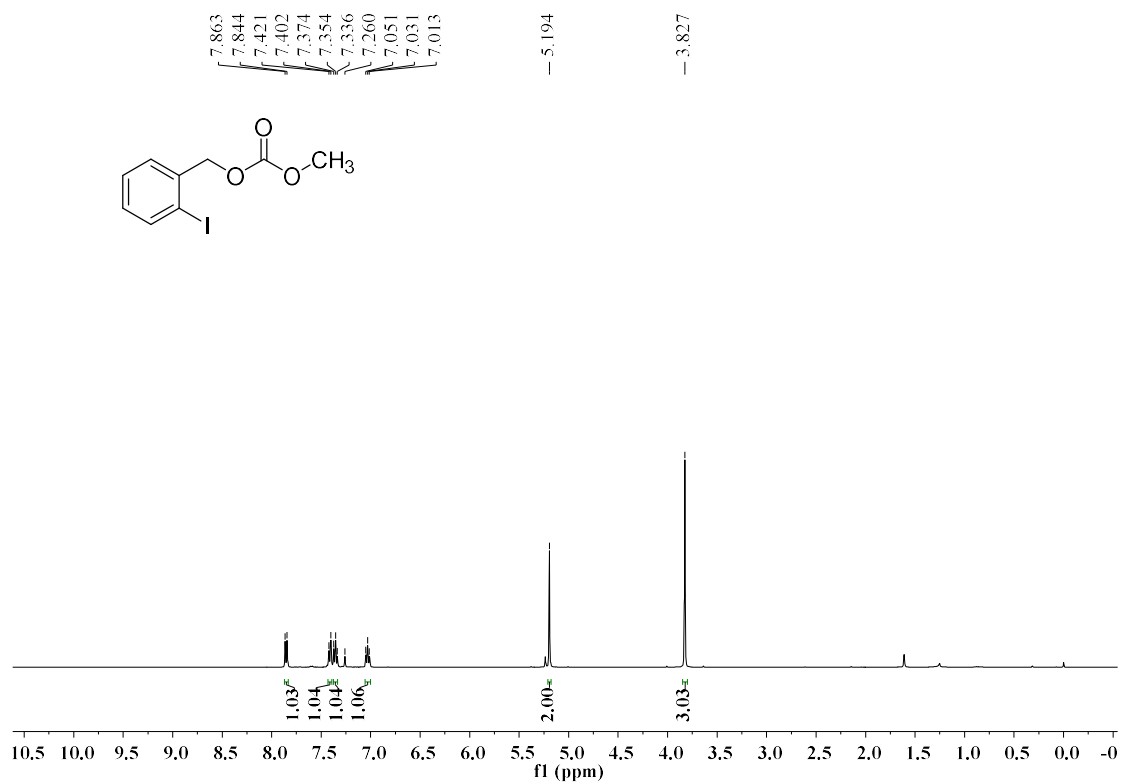

### <sup>13</sup>C NMR (100 MHz, CDCl<sub>3</sub>) spectrum of 3q

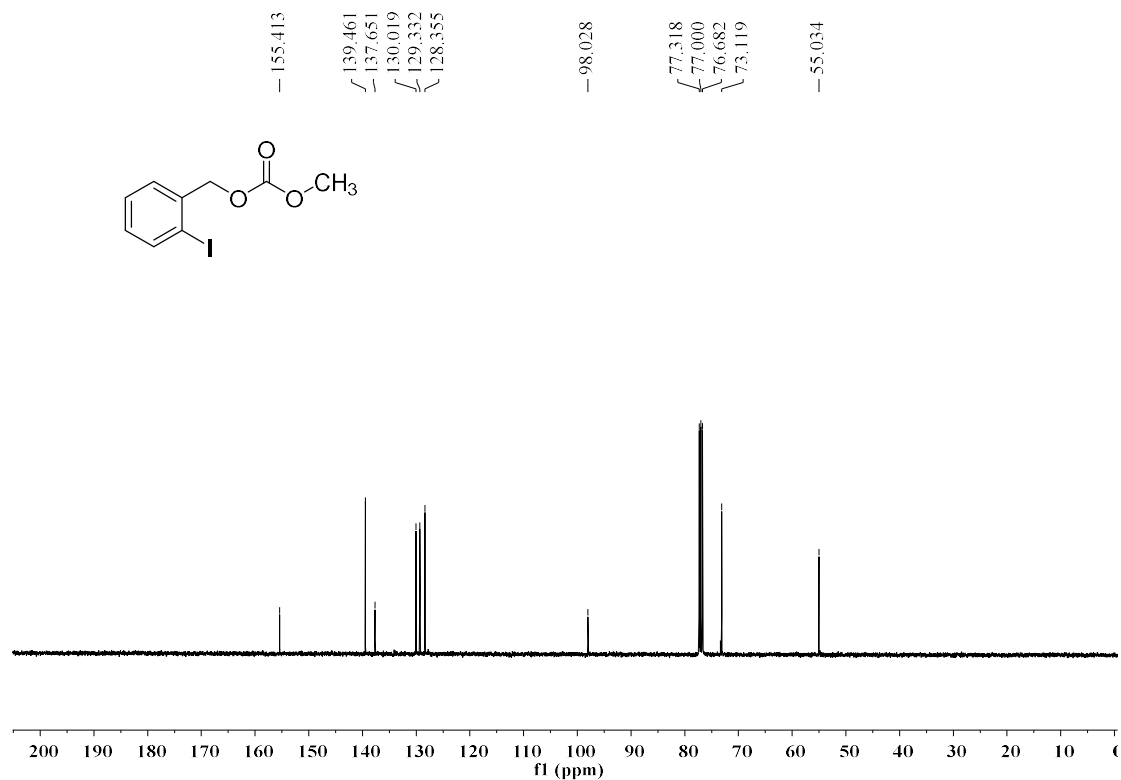

### <sup>1</sup>H NMR (400 MHz, CDCl<sub>3</sub>) spectrum of 3r

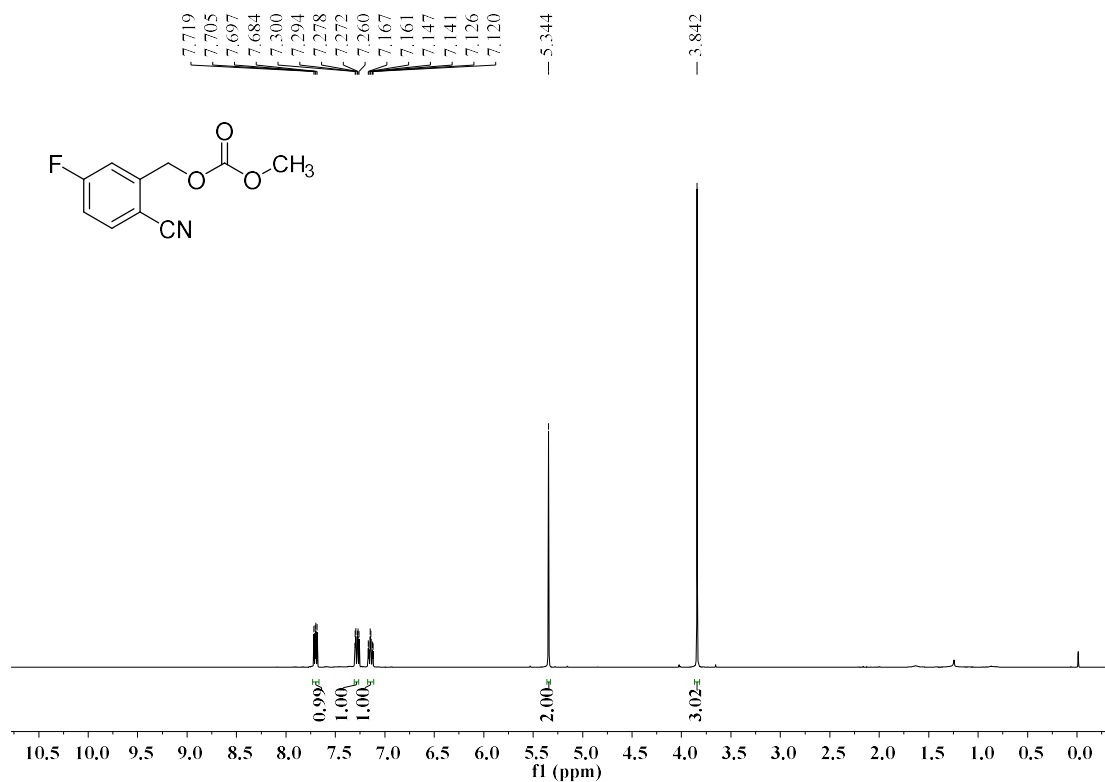

### <sup>13</sup>C NMR (100 MHz, CDCl<sub>3</sub>) spectrum of 3r

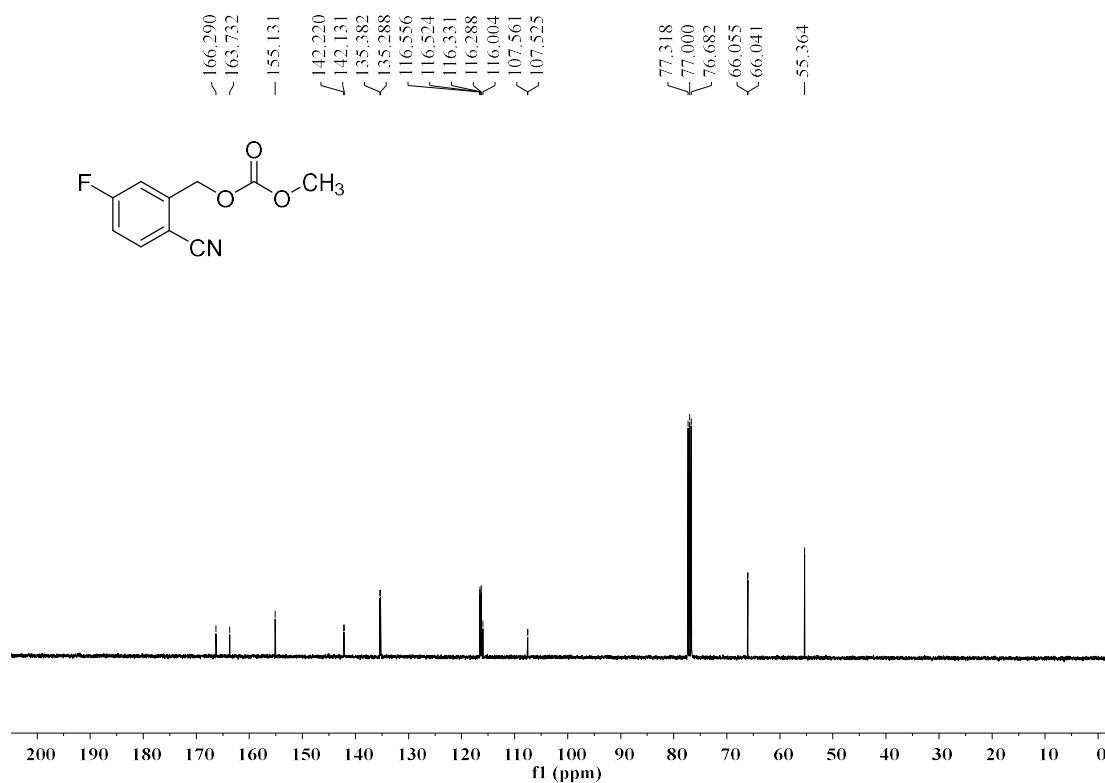

### <sup>1</sup>H NMR (400 MHz, CDCl<sub>3</sub>) spectrum of 3s

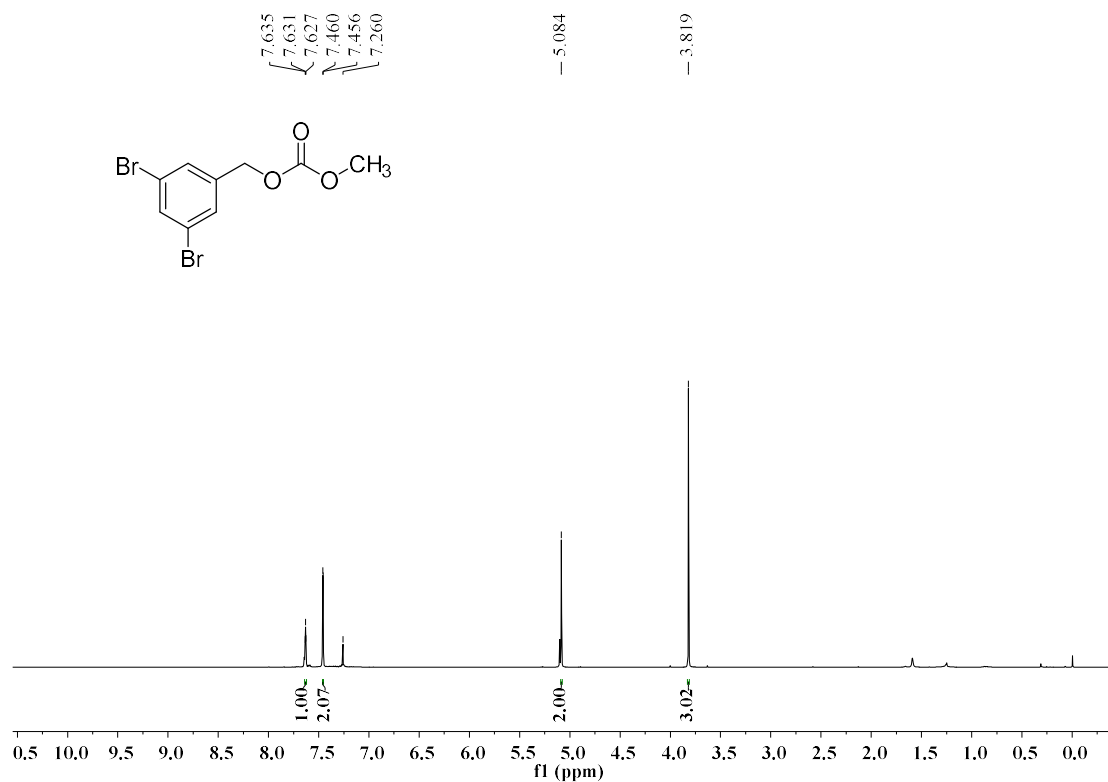

### <sup>13</sup>C NMR (100 MHz, CDCl<sub>3</sub>) spectrum of 3s

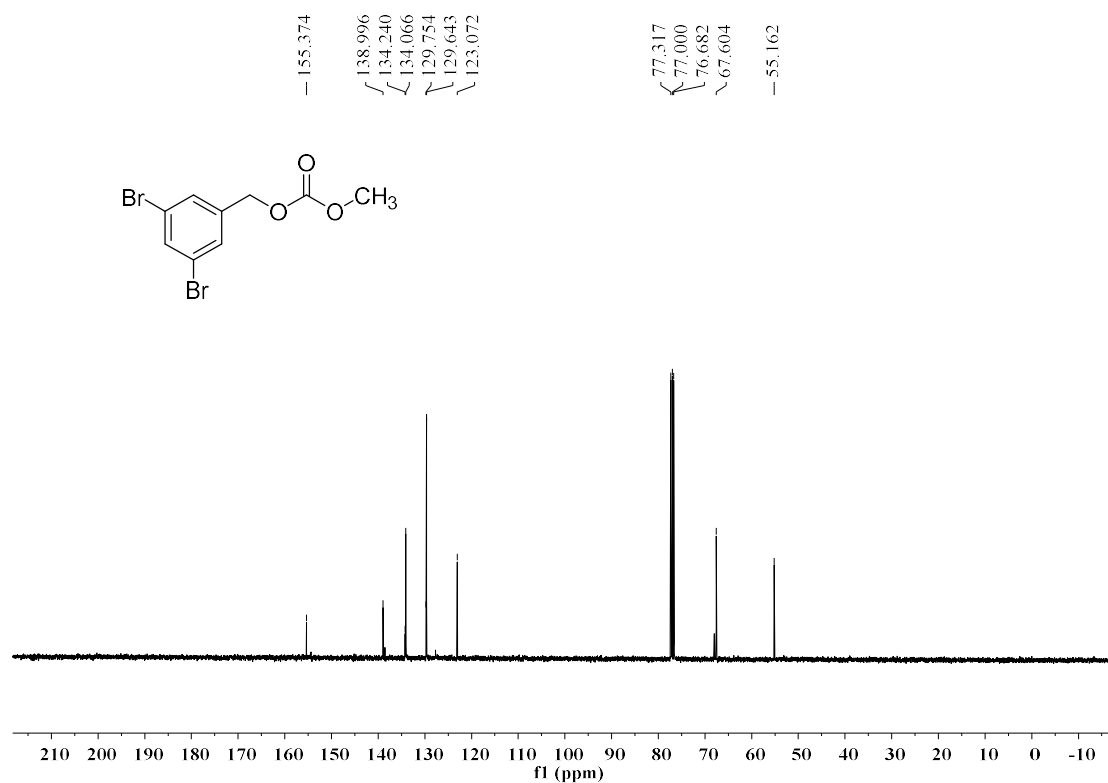

### <sup>1</sup>H NMR (400 MHz, CDCl<sub>3</sub>) spectrum of 3t

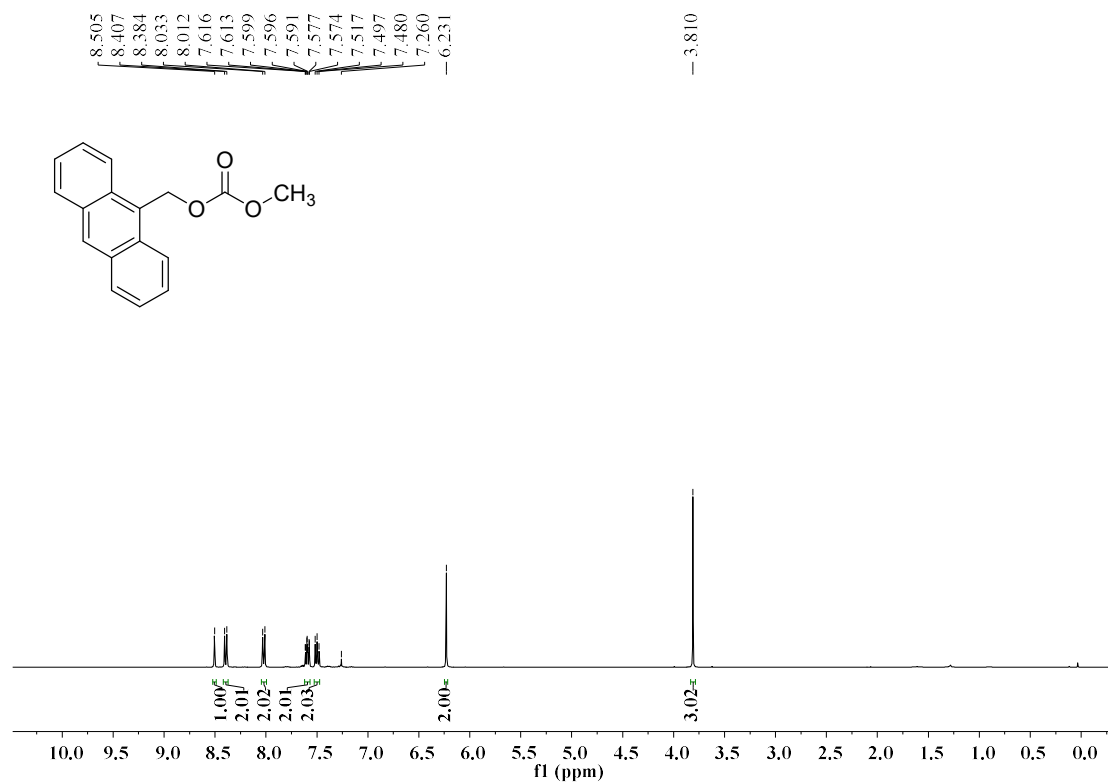

### <sup>13</sup>C NMR (100 MHz, CDCl<sub>3</sub>) spectrum of 3t

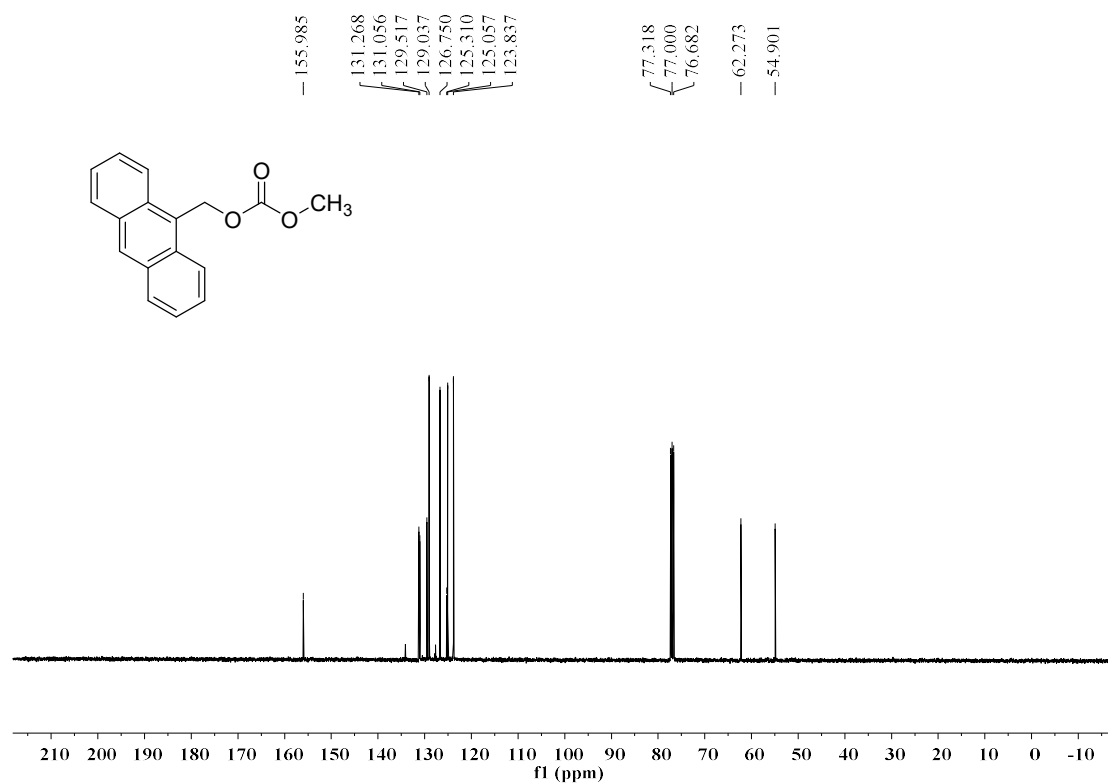

### <sup>1</sup>H NMR (400 MHz, CDCl<sub>3</sub>) spectrum of 3u

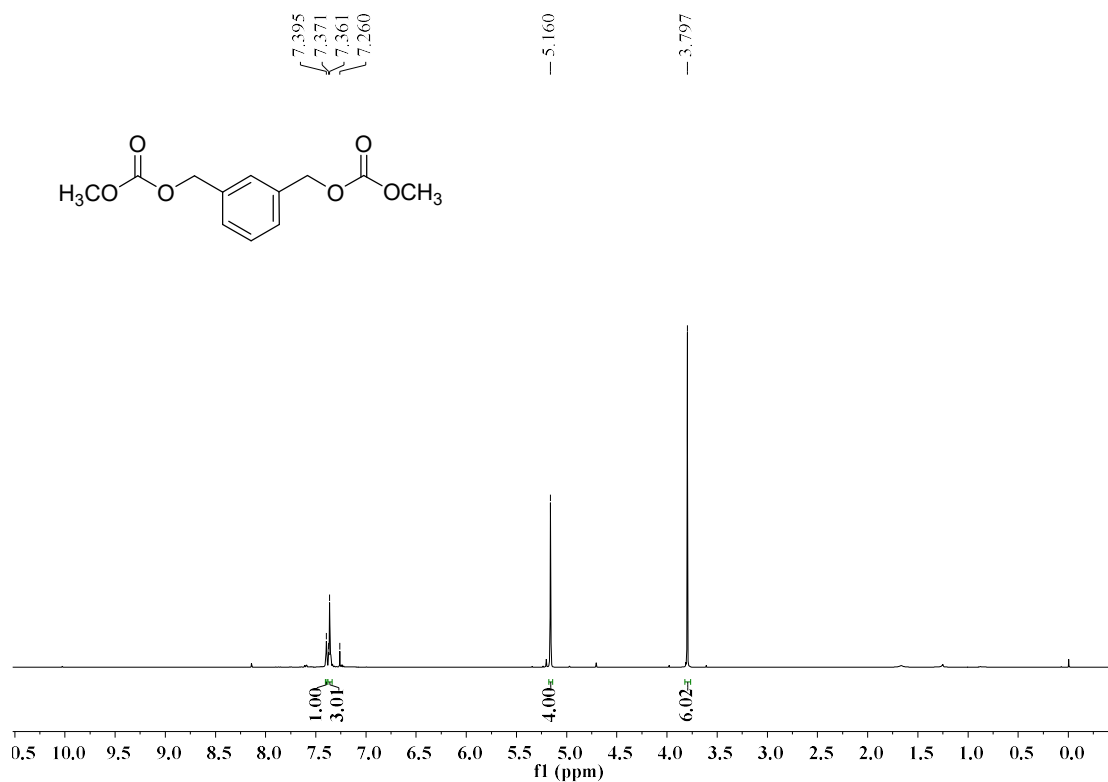

### <sup>13</sup>C NMR (100 MHz, CDCl<sub>3</sub>) spectrum of 3u

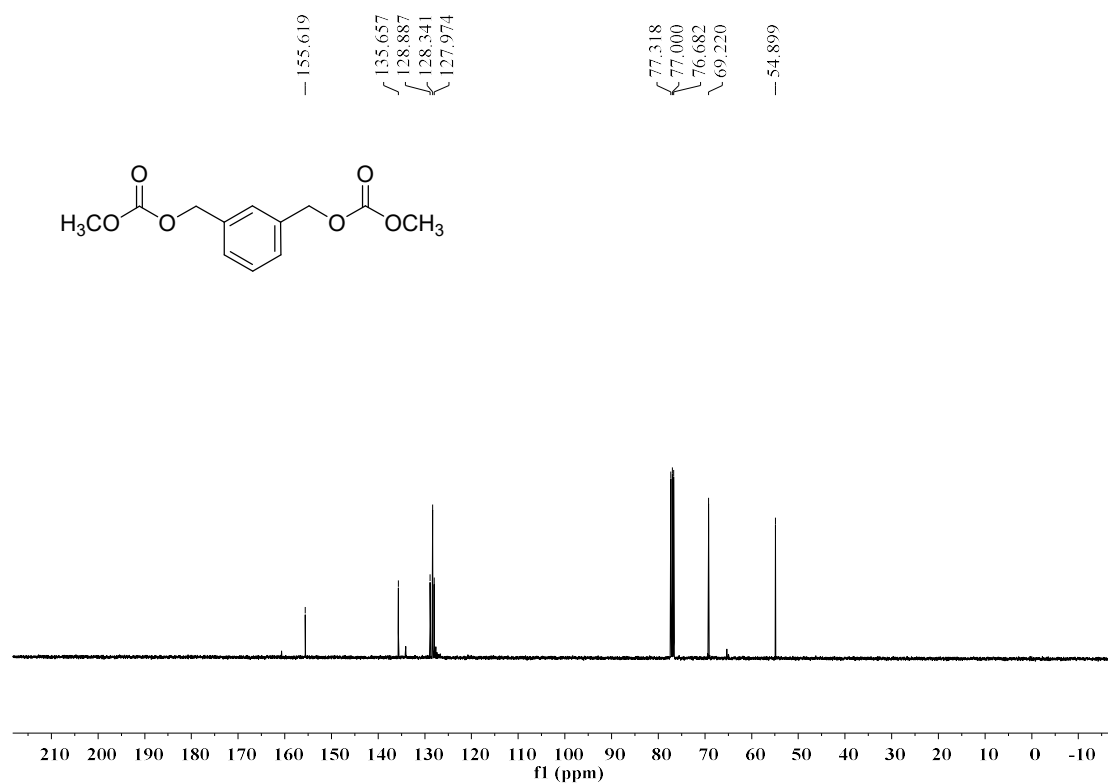

### <sup>1</sup>H NMR (400 MHz, CDCl<sub>3</sub>) spectrum of 3v

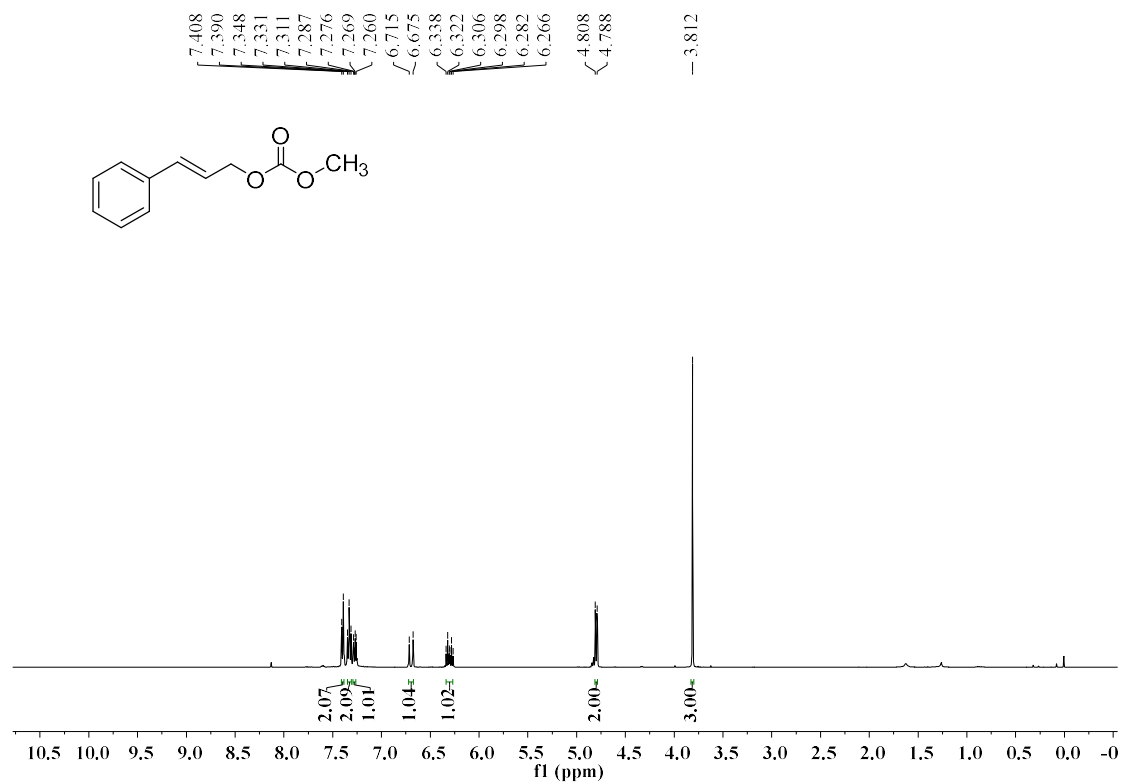

### <sup>13</sup>C NMR (100 MHz, CDCl<sub>3</sub>) spectrum of 3v

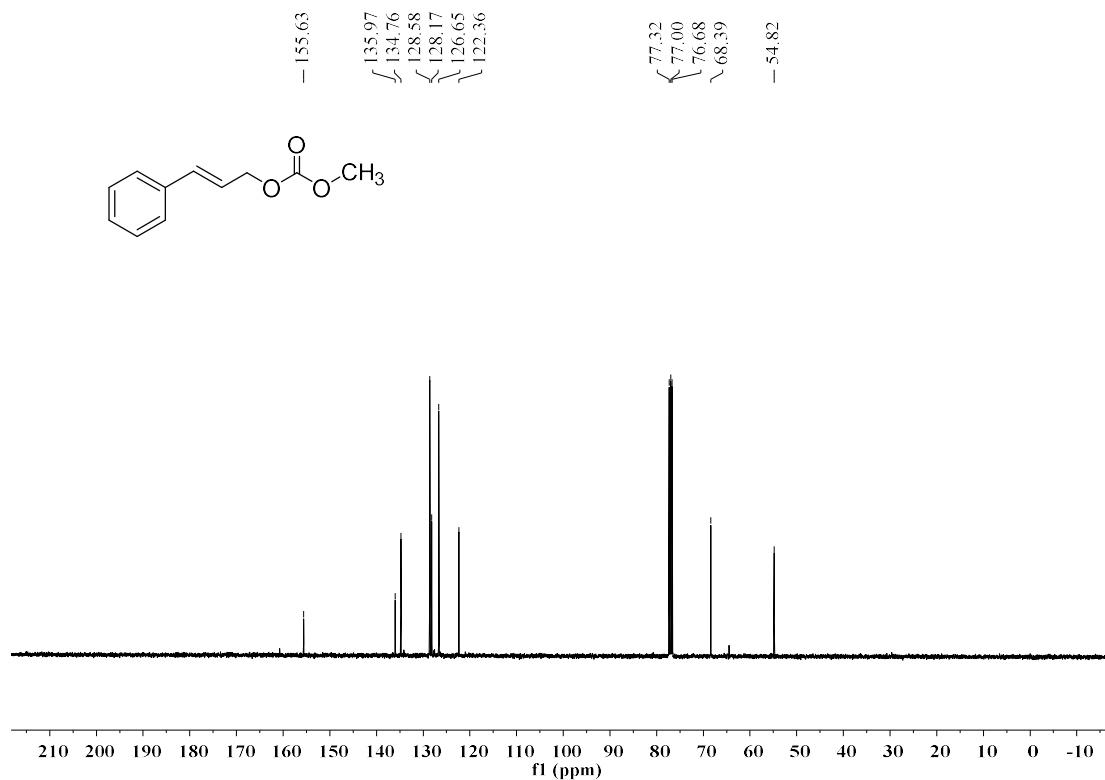

### <sup>1</sup>H NMR (400 MHz, CDCl<sub>3</sub>) spectrum of 3w

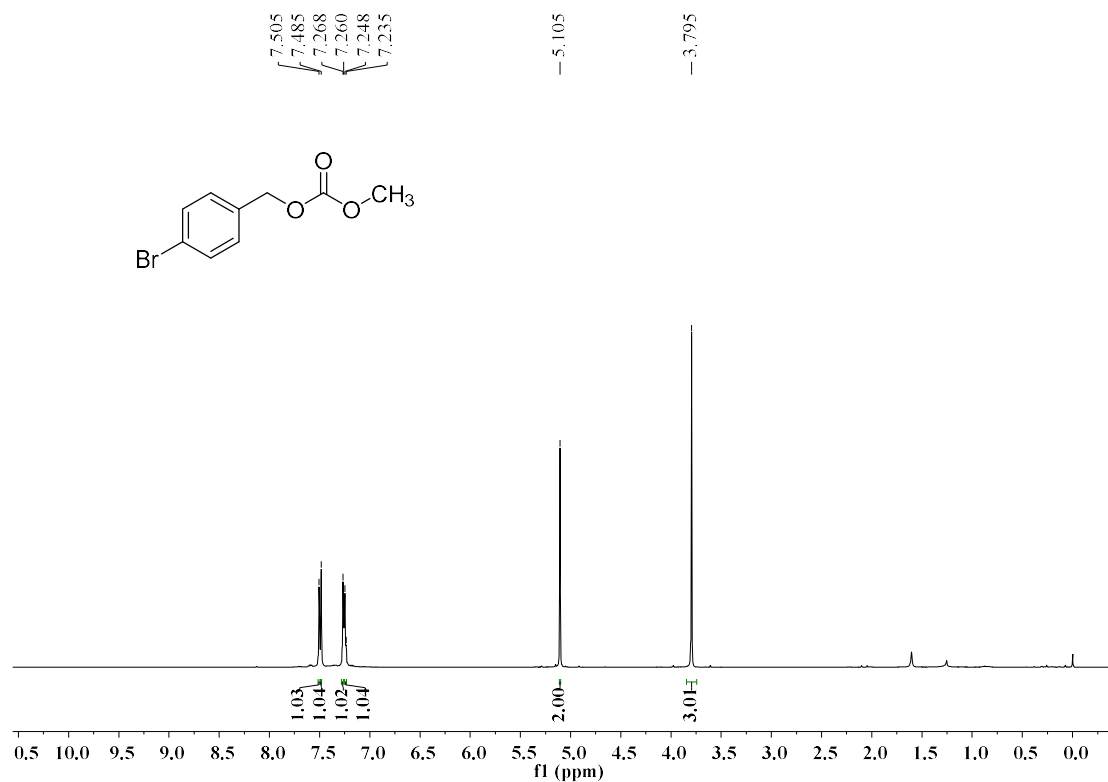

### <sup>13</sup>C NMR (100 MHz, CDCl<sub>3</sub>) spectrum of 3w

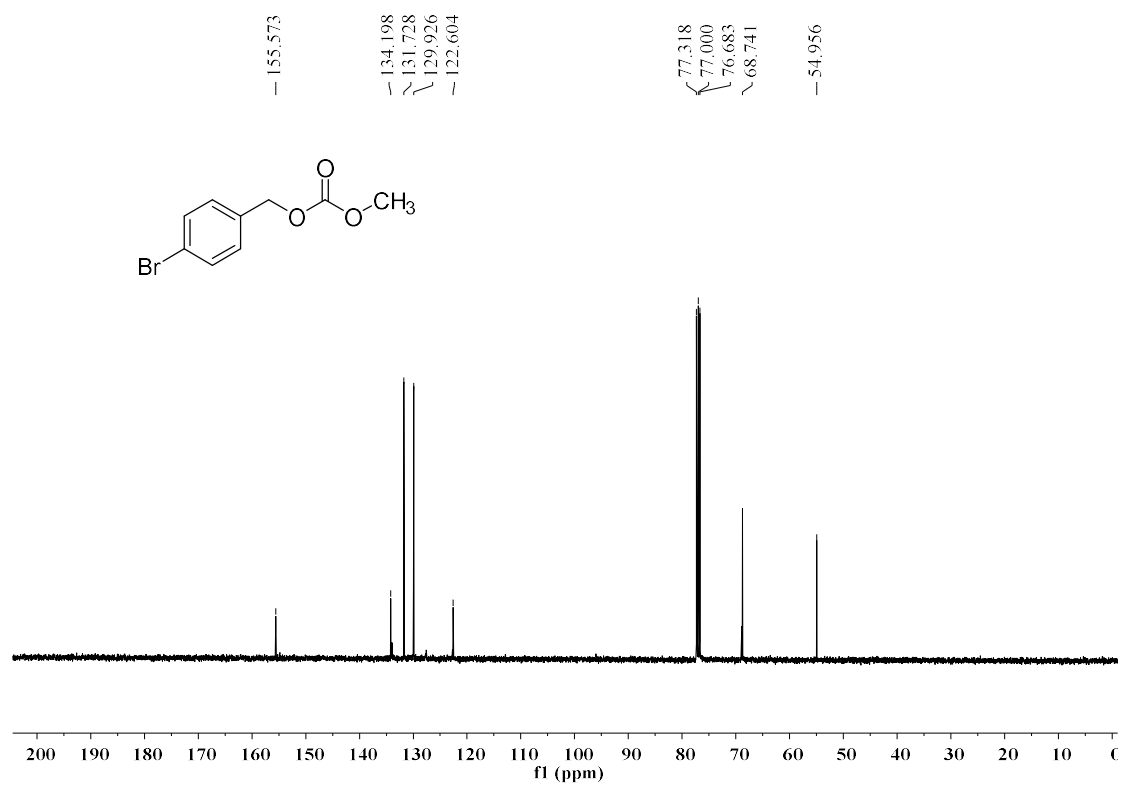

### <sup>1</sup>H NMR (400 MHz, CDCl<sub>3</sub>) spectrum of 3x

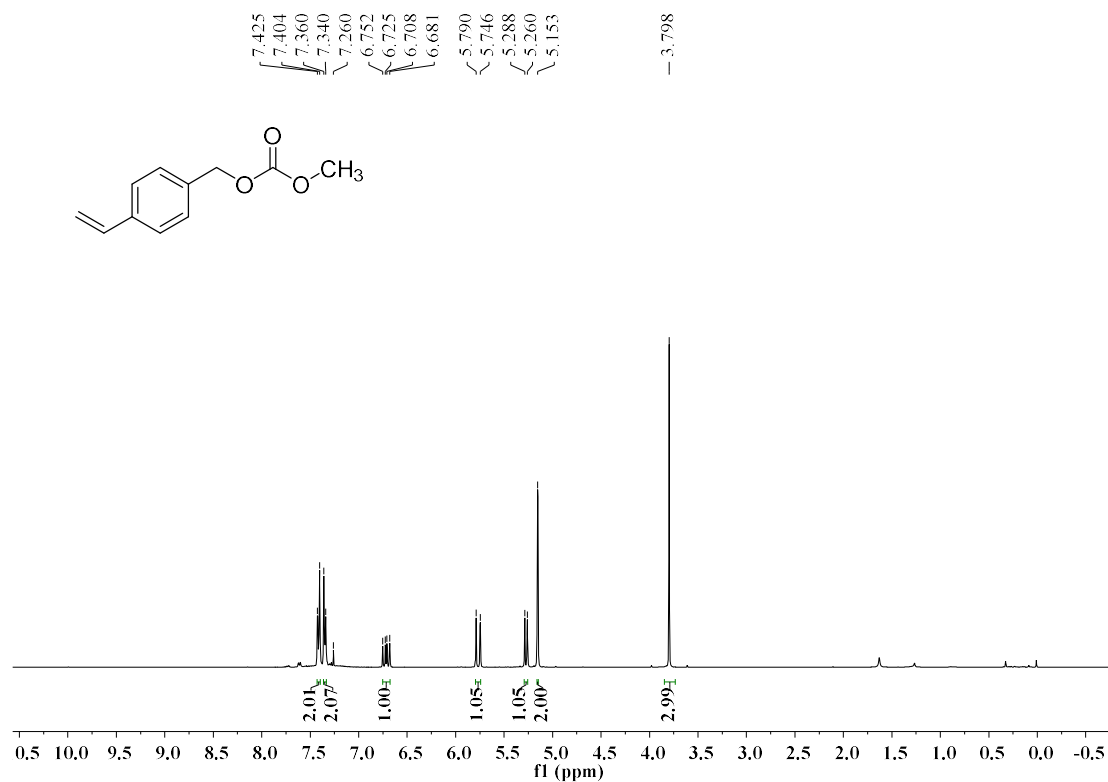

### <sup>13</sup>C NMR (100 MHz, CDCl<sub>3</sub>) spectrum of 3x

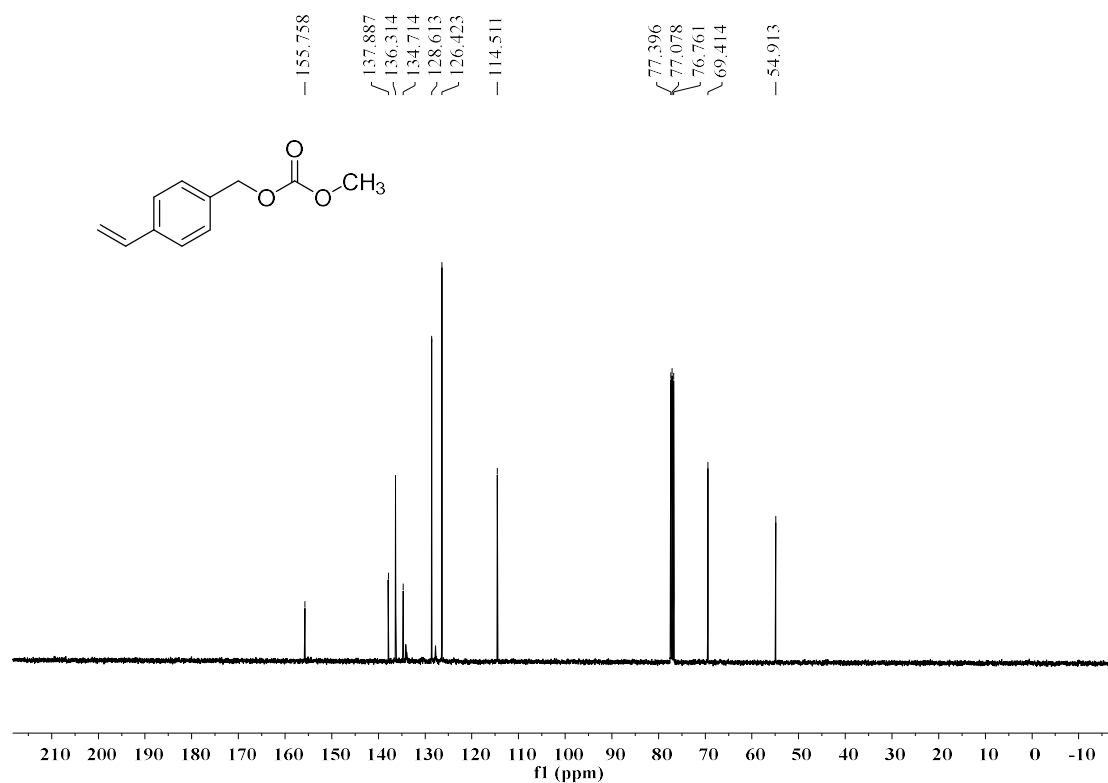

### <sup>1</sup>H NMR (400 MHz, CDCl<sub>3</sub>) spectrum of 3y

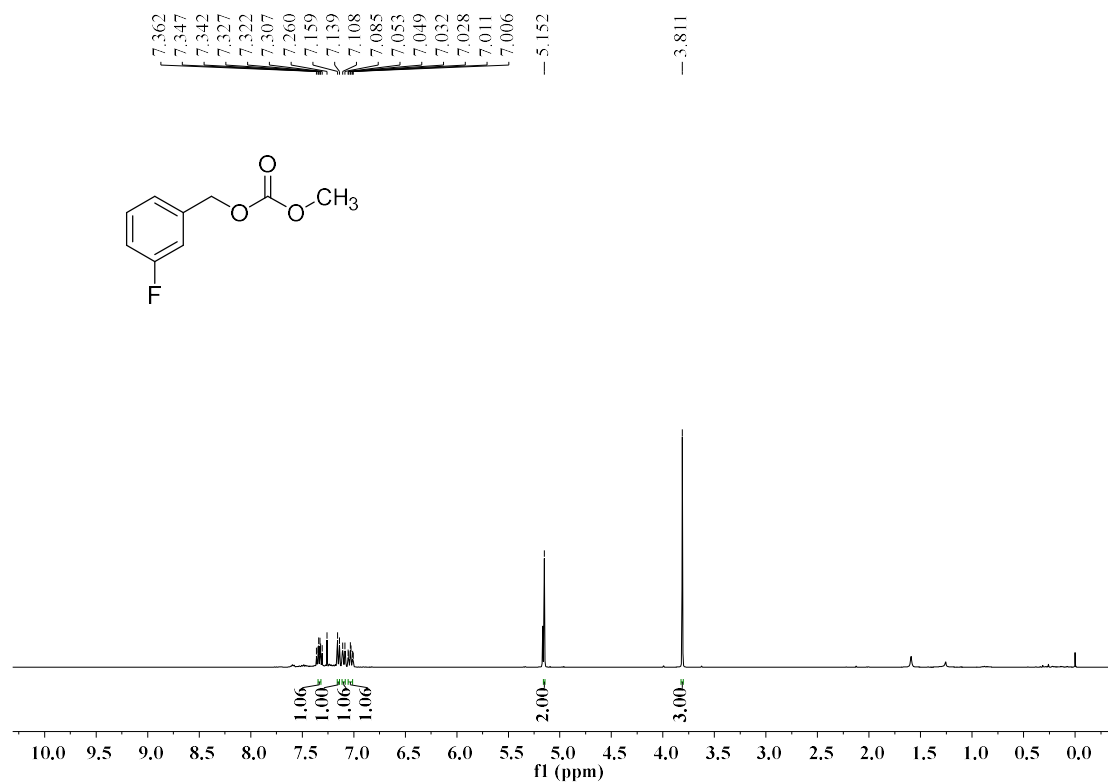

### <sup>13</sup>C NMR (100 MHz, CDCl<sub>3</sub>) spectrum of 3y

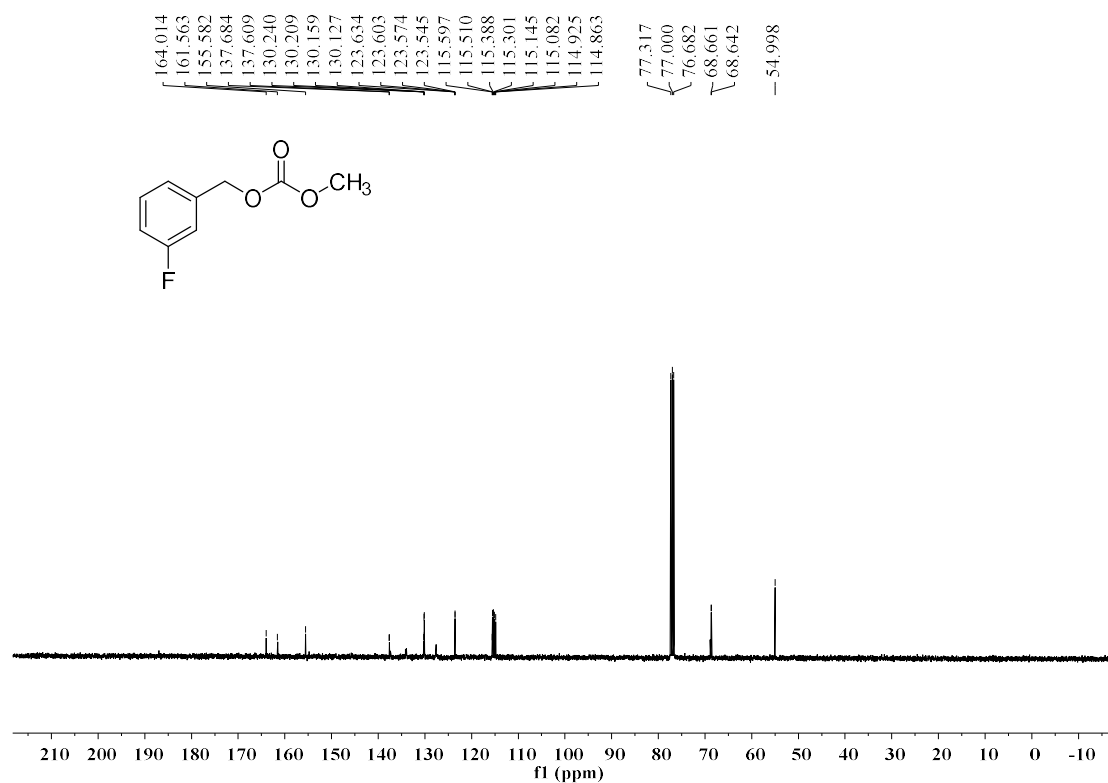

### <sup>1</sup>H NMR (400 MHz, CDCl<sub>3</sub>) spectrum of 3z

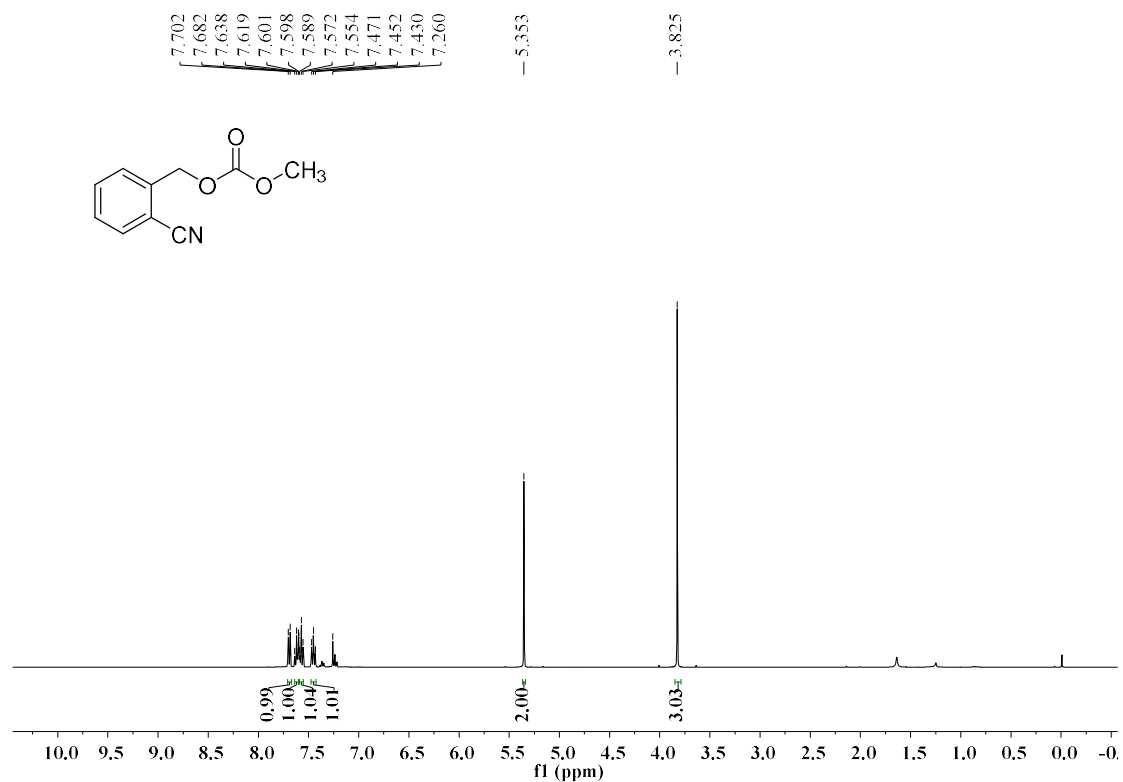

### <sup>13</sup>C NMR (100 MHz, CDCl<sub>3</sub>) spectrum of 3z

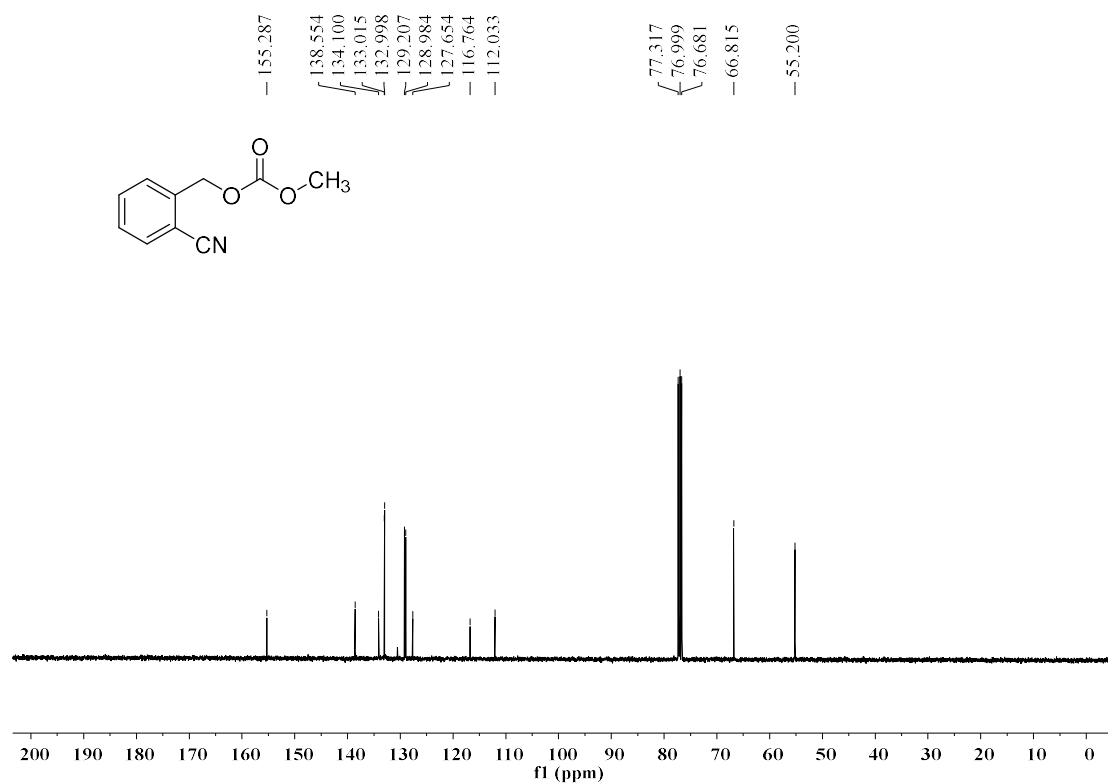

### <sup>1</sup>H NMR (400 MHz, CDCl<sub>3</sub>) spectrum of 3aa

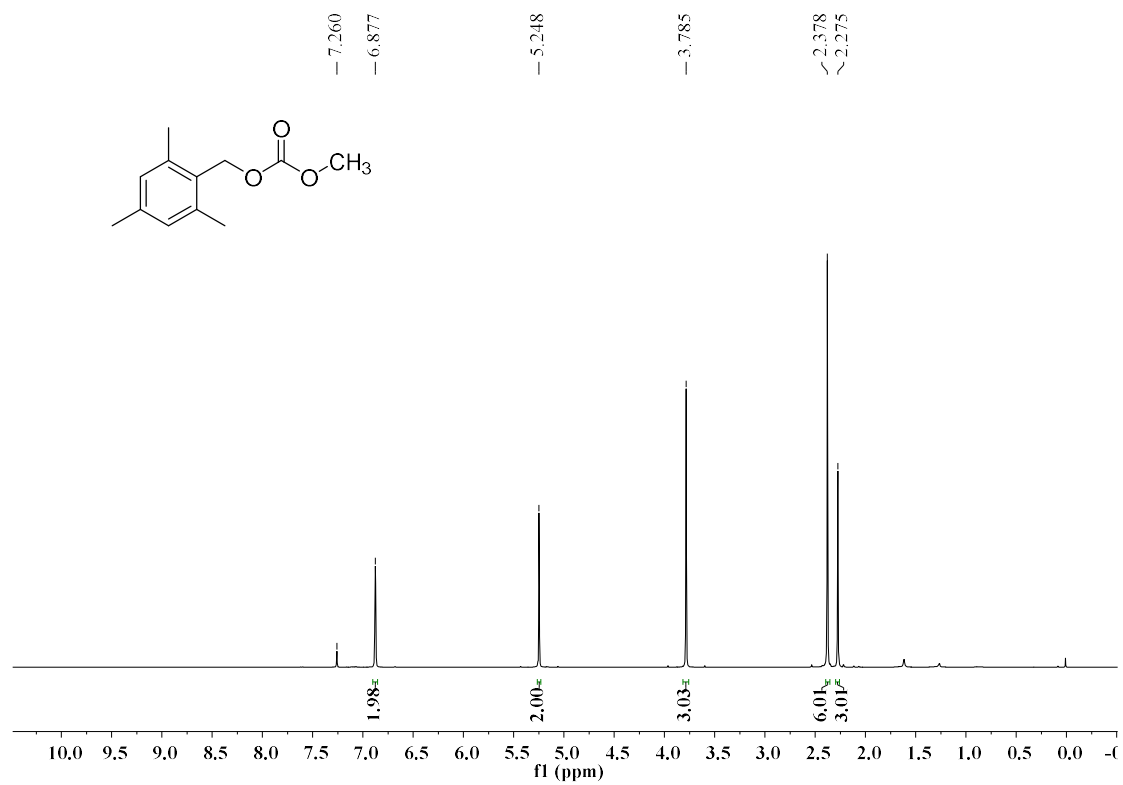

### <sup>13</sup>C NMR (100 MHz, CDCl<sub>3</sub>) spectrum of 3aa

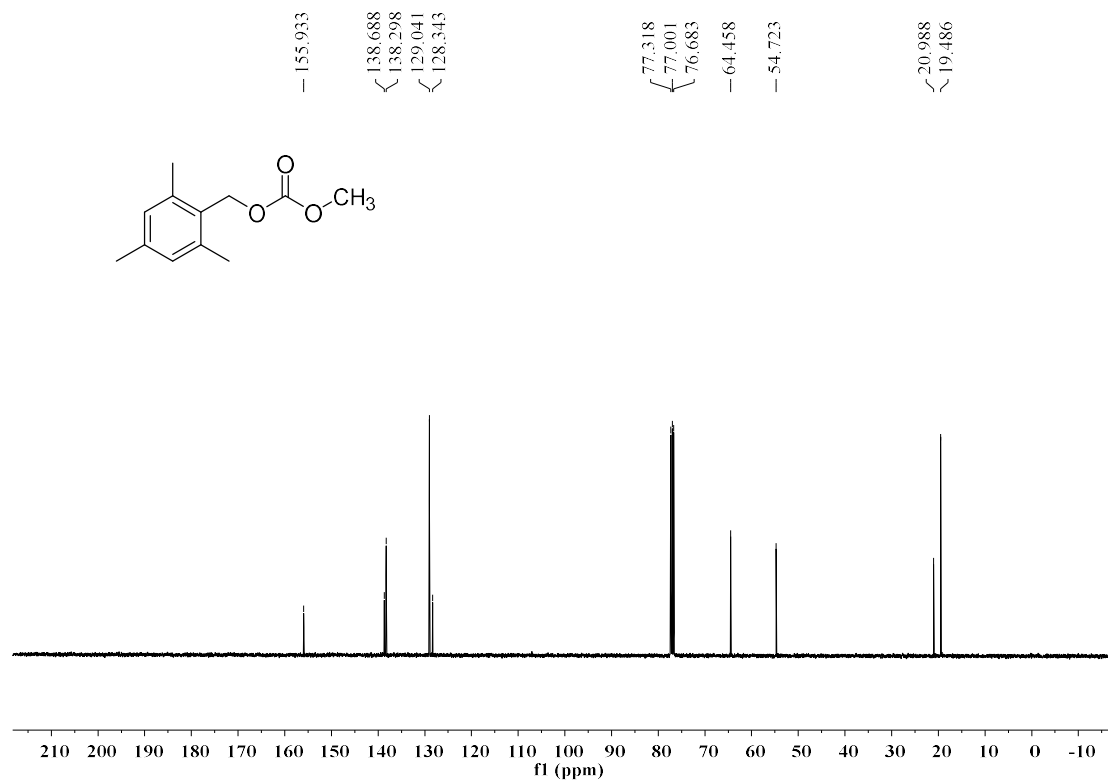

### <sup>1</sup>H NMR (400 MHz, CDCl<sub>3</sub>) spectrum of 3ab

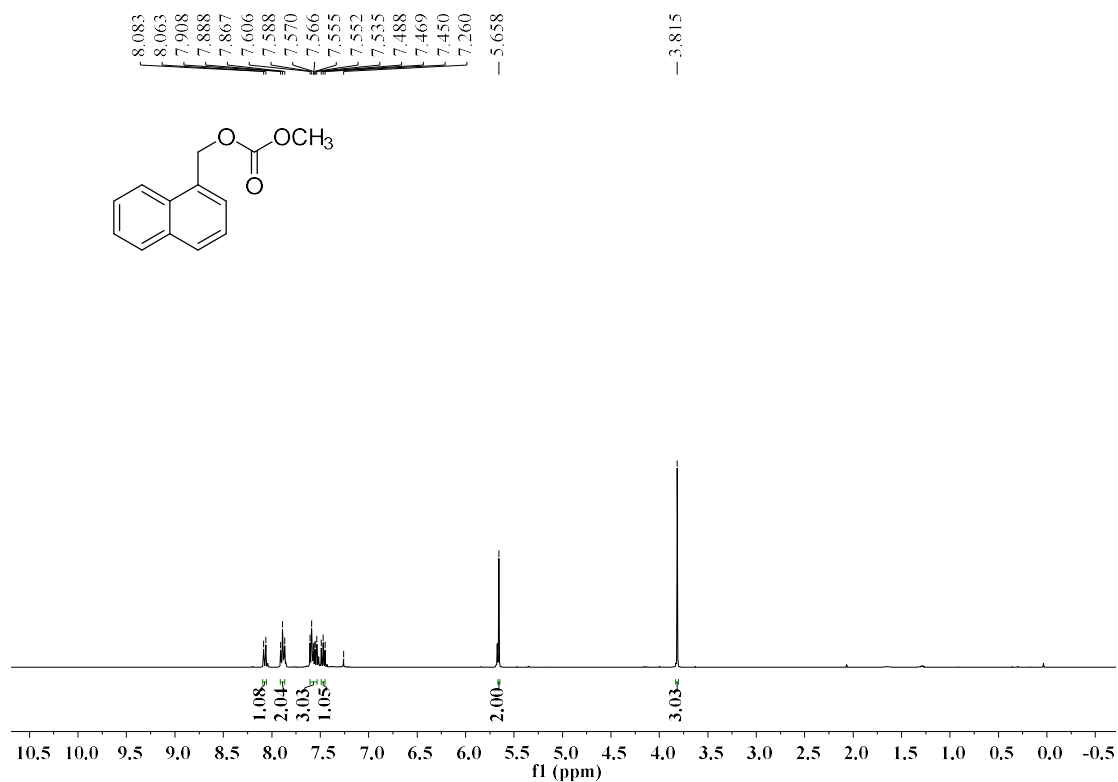

### <sup>13</sup>C NMR (100 MHz, CDCl<sub>3</sub>) spectrum of 3ab

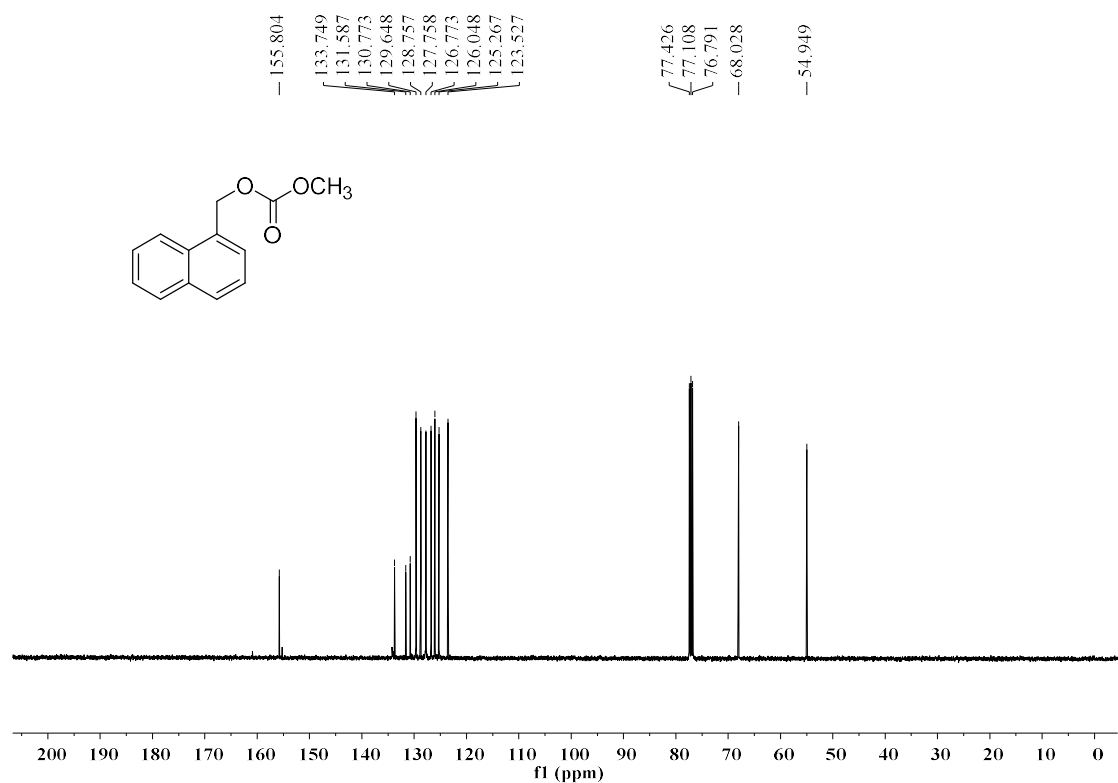

### <sup>1</sup>H NMR (400 MHz, CDCl<sub>3</sub>) spectrum of 2a'

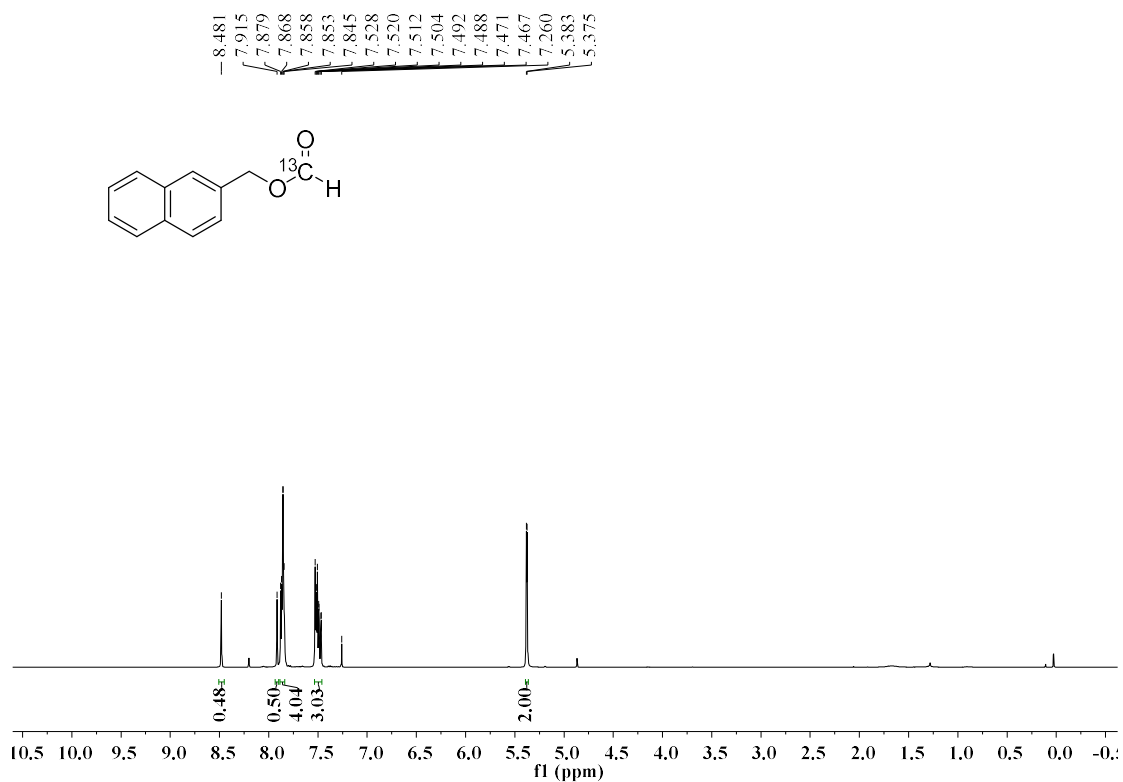

### <sup>13</sup>C NMR (100 MHz, CDCl<sub>3</sub>) spectrum of 2a'

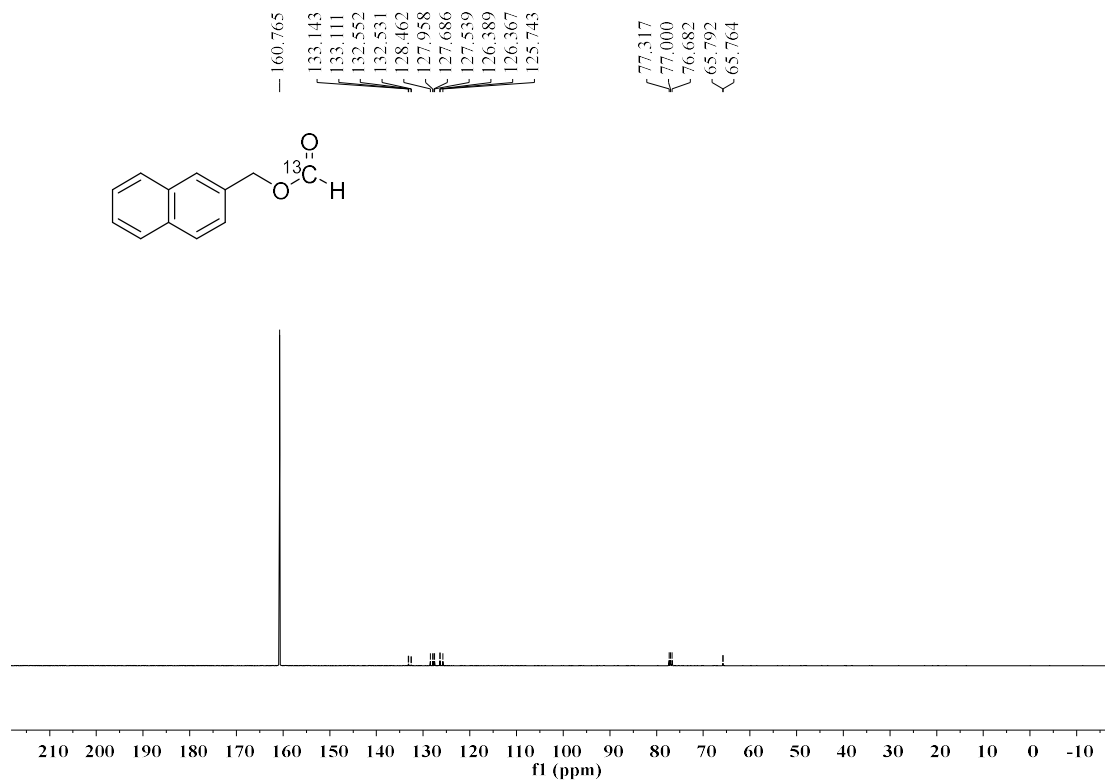

### <sup>1</sup>H NMR (400 MHz, CDCl<sub>3</sub>) spectrum of 2a-D

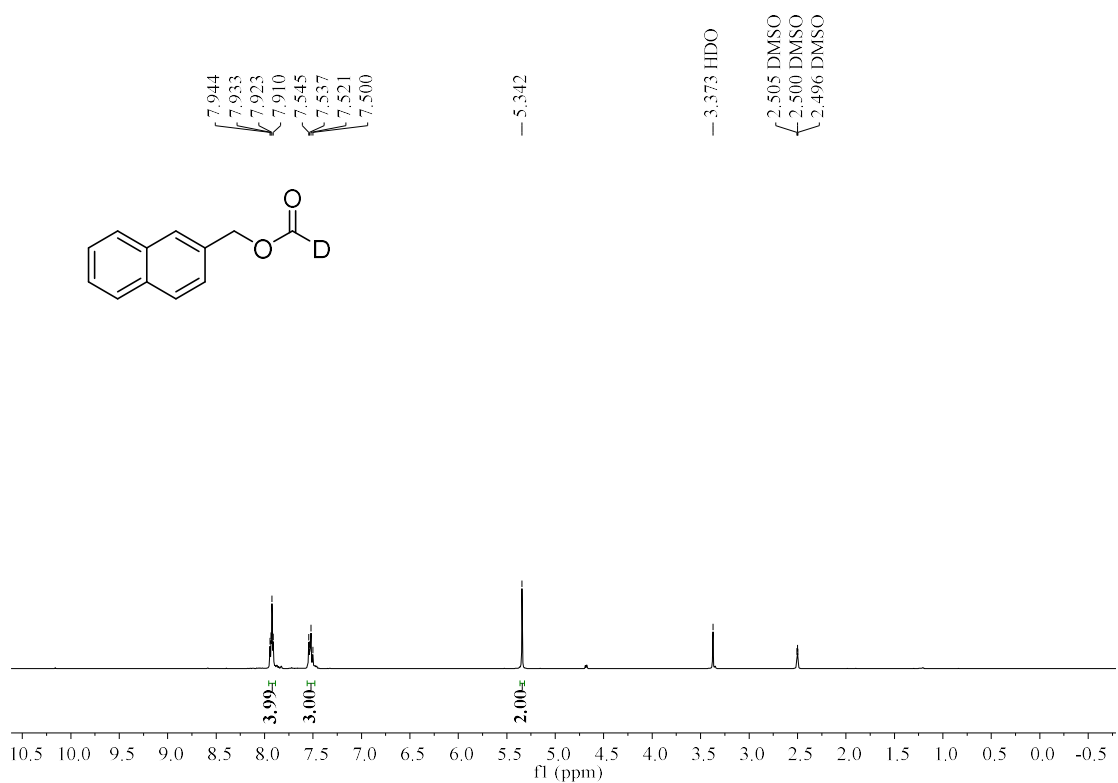

**<sup>13</sup>C NMR (100 MHz, CDCl<sub>3</sub>) spectrum of 2a-D**

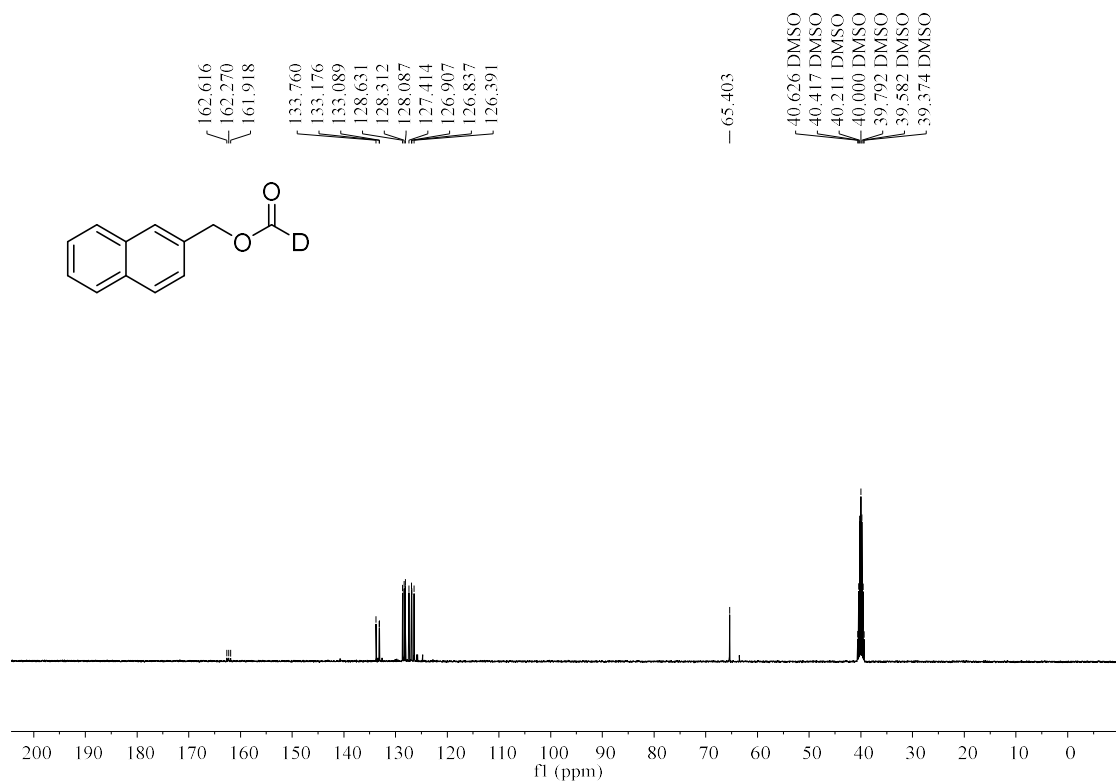

**<sup>1</sup>H NMR (400 MHz, CDCl<sub>3</sub>) spectrum of 3a'**

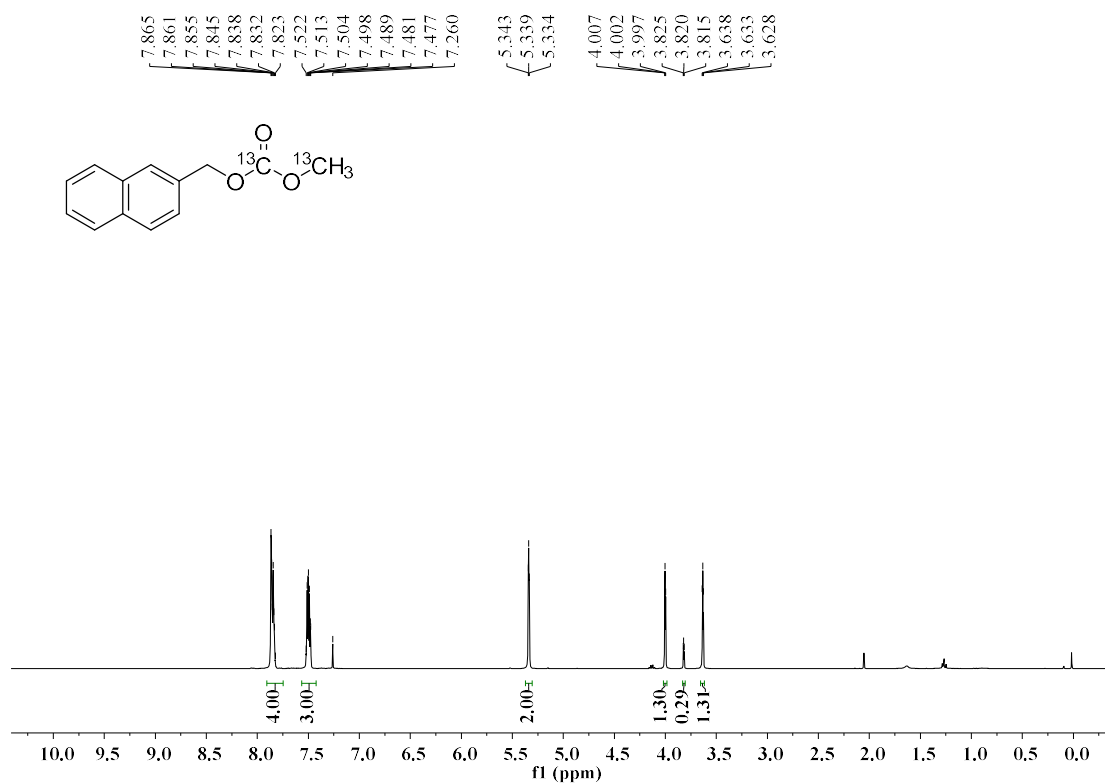

<sup>13</sup>C NMR (100 MHz, CDCl<sub>3</sub>) spectrum of 3a'

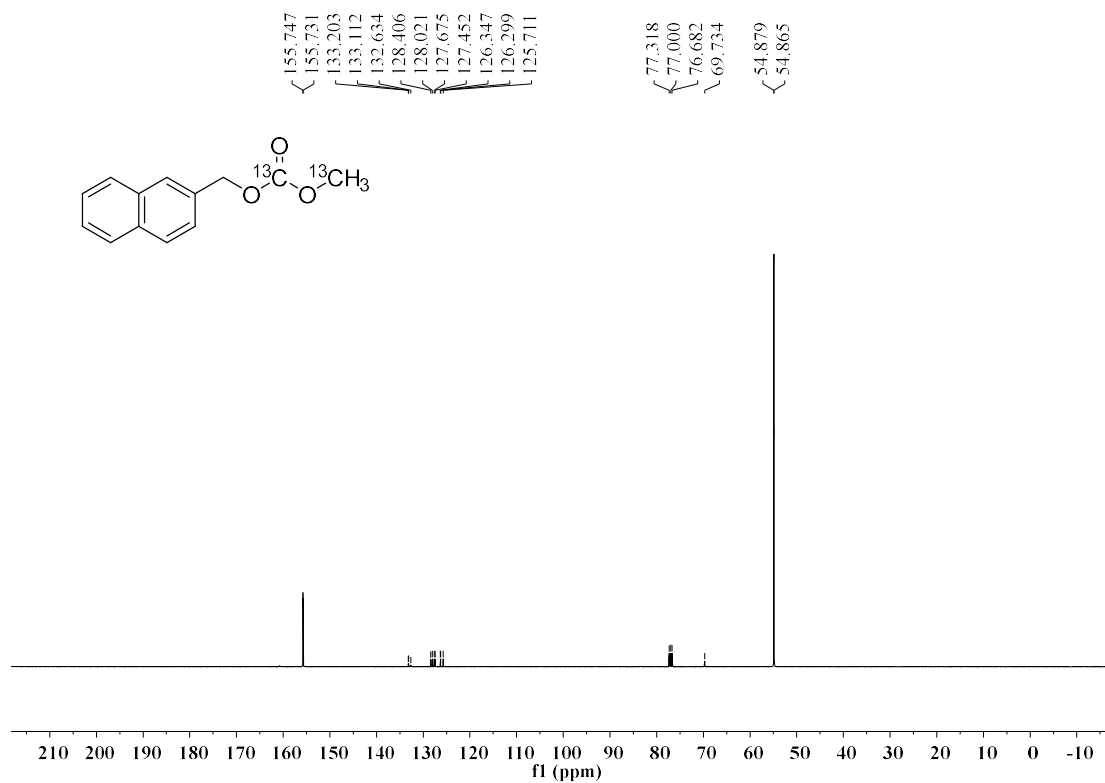

<sup>1</sup>H NMR (400 MHz, CDCl<sub>3</sub>) spectrum of 3a-D

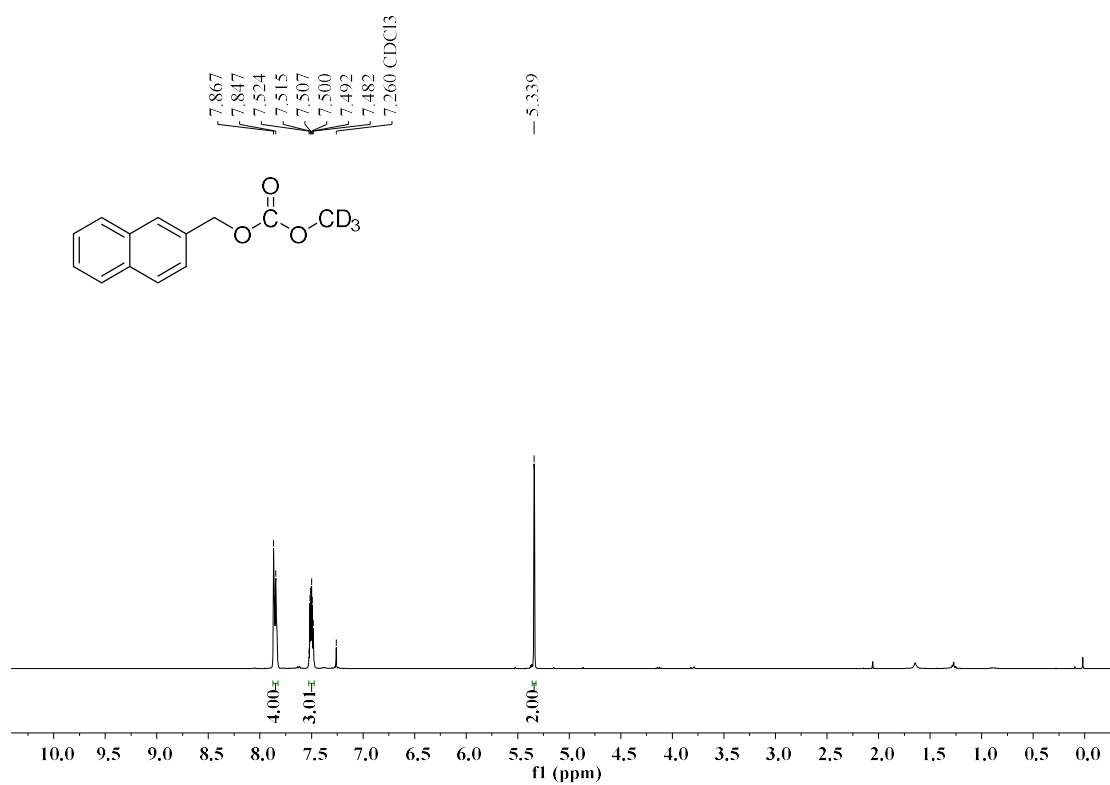

**<sup>13</sup>C NMR (100 MHz, CDCl<sub>3</sub>) spectrum of 3a-D**

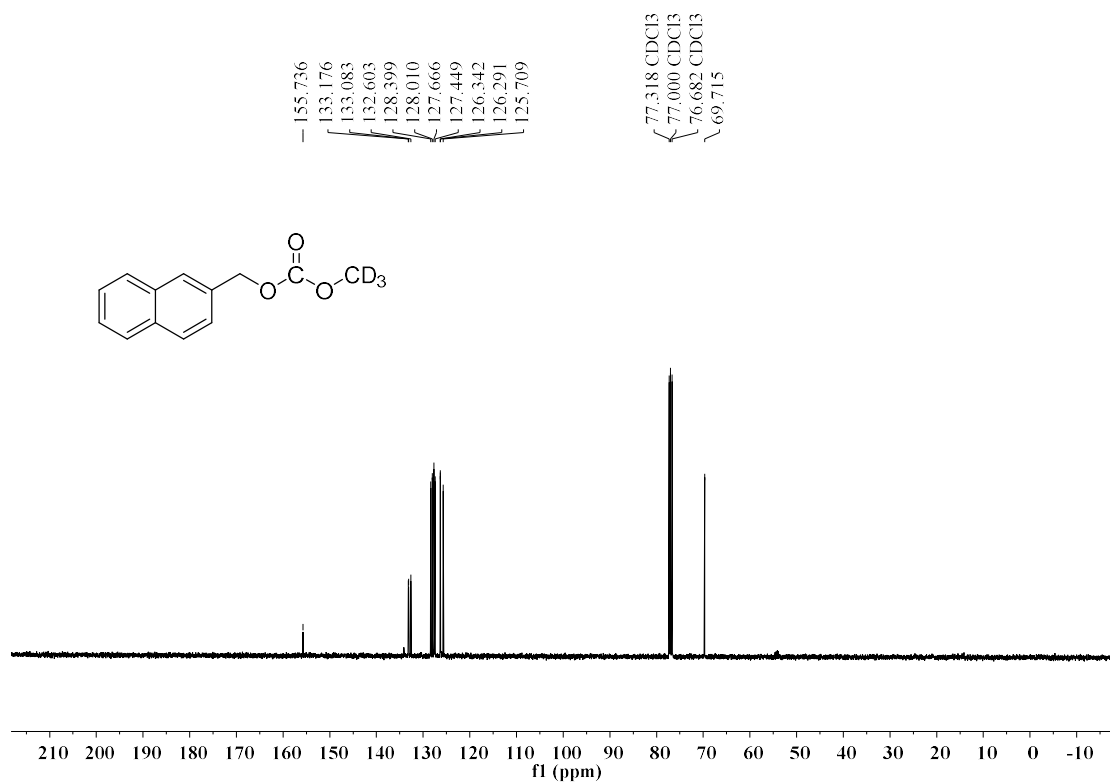

Supplement: d6ob00632a1.pdf [file d6ob00632a1.pdf]
